# Supplementary material
Source: PubMed Central journal article supplement (PMC2600731)
Supplement: NIHMS61266-supplement-si20060728_045.pdf [file NIHMS61266-supplement-si20060728_045.pdf]

# Zirconium Bis(Amido) Catalysts for Asymmetric Intramolecular Alkene Hydroamination

*Donald A. Watson, Melanie Chiu and Robert G. Bergman\**

Department of Chemistry, University of California, Berkeley, California 94720-1460

rbergman@berkeley.edu

## **Supporting Information**

| Index:                                      | Page |
|---------------------------------------------|------|
| General Experimental Details and Procedures | S2   |
| Preparation of Diarylphosphinic Acids       | S3   |
| Preparation of Diphosphinic Amide Ligands   | S5   |
| Procedures for Cyclization Experiments      | S11  |
| Spectral and Chromatographic Data           | S15  |

## General Experimental Details.

“Oven-dried” glassware was dried at 180 °C for at least 12 h before use. THF, CH<sub>2</sub>Cl<sub>2</sub>, and PhMe were dried according to published procedures.<sup>1</sup> Triethylamine, pyridine, F-Ph, and Cl-Ph were distilled from CaH<sub>2</sub> and deoxygenated prior to use. 1,4-Dioxane was distilled from Na/benzophenone ketyl prior to use. For in situ NMR experiments, C<sub>6</sub>D<sub>6</sub> and d<sub>8</sub>-toluene were sparged with N<sub>2</sub> and stored over 4Å molecular sieves prior to use. Ligands were dried under high vacuum (*ca.* 20 mtorr) for at least 12 h prior to use. Hydroamination substrates were prepared according to literature procedures.<sup>2</sup> All other reagents and solvents were purchased at highest commercial quality and used as received. Unless otherwise noted, reactions were run using standard Shlenk line techniques. Where noted a nitrogen filled glovebox was used.

## General Procedures:

**General Procedure 1. Preparation of Diarylphosphinic Acids.** In an oven-dried flask protected by an atmosphere of N<sub>2</sub>, a rapidly stirred solution of aryl bromide in THF was treated dropwise with a solution of either <sup>1</sup>PrMgCl or <sup>t</sup>BuLi at -78 °C. The solution was stirred for 10 min, warmed to 25 °C and stirred for 30 min. The solution was re-cooled to -78 °C and treated with 0.5 equivalents Cl<sub>2</sub>P(O)NMe<sub>2</sub> in one portion. The reaction mixture was warmed to 25 °C and stirred for 12 h. The flask was opened to the atmosphere and treated with 3 equivalents of 6 M aqueous HCl. The resulting suspension was rapidly stirred for 3–12 h until the reaction was completed as judged by TLC or <sup>31</sup>P NMR analysis<sup>3</sup> and then worked up and purified as indicated.

**General Procedure 2. Preparation of Diphosphinic Amide Ligands from Chlorodiarylphosphines or Chlorodialkylphosphines.** In an oven-dried 20 mL vial protected by an atmosphere of N<sub>2</sub> and equipped with a septum and a magnetic stirbar, R<sub>2</sub>PCl (2.1 equiv) was added to a solution of chiral diamine (1 equiv) and Et<sub>3</sub>N (5 equiv) in CH<sub>2</sub>Cl<sub>2</sub> at 25 °C. The reaction mixture was stirred for 12 h, opened to the atmosphere, and cooled to 0 °C with an ice bath. A solution of either *t*-BuOOH (5.5 M in decane, 3-4 equiv) or H<sub>2</sub>O<sub>2</sub> (30% aqueous, 3-4 equiv) was slowly added (note: oxidation is exothermic). The reaction mixture was stirred at 0 °C for 10 min, then at 25 °C for 30 min before being quenched with aqueous Na<sub>2</sub>S<sub>2</sub>O<sub>3</sub> (1 M, 10 equiv). The resulting biphasic solution was extracted with CH<sub>2</sub>Cl<sub>2</sub> and the combined extracts were dried (Na<sub>2</sub>SO<sub>4</sub>) and concentrated in vacuo. The product was purified as specified below.

---

<sup>1</sup> Pangborn, A. B.; Giardello, M. A.; Grubbs, R. H.; Rosen, R. K.; Timmers, F. J. *Organometallics* **1996**, *15*, 1518.

<sup>2</sup> (a) Tamaru, Y.; Hojo, M.; Higashimura, H.; Yoshida, Z. *J. Am. Chem. Soc.* **1988**, *110*, 3994–4002. (b) Harding, K. E.; Burks, S. R. *J. Org. Chem.* **1981**, *46*, 3920–3922. (c) Hurd, C. D.; Jenkins, W. W. *J. Org. Chem.* **1957**, *22*, 1418–1423.

<sup>3</sup> Monitoring by <sup>31</sup>P NMR was readily accomplished by transferring a 200 µL sample of the biphasic solution into an NMR tube containing 0.6 mL CDCl<sub>3</sub> and obtaining a spectrum directly of the solution once the water layer had risen to top of the biphasic solution.

**General Procedure 3. Preparation of Diphosphinic Amide Ligands from Diarylphosphinic Acids.** In an oven-dried Schlenk flask protected by an atmosphere of N<sub>2</sub> and equipped with a reflux condenser, stirbar and nitrogen inlet, the diarylphosphinic acid was dissolved in an excess of SOCl<sub>2</sub> and then heated at reflux for 30 min. The reaction mixture was cooled to 25 °C, the reflux condenser was replaced with a greased glass stopper and the remaining SOCl<sub>2</sub> was removed in vacuo. The resulting phosphinic chloride was dried under high vacuum (*ca.* 100 mm Hg) for at least 12 h before continuing. The glass stopper was then replaced with a rubber septum and the phosphinic chloride was dissolved in CH<sub>2</sub>Cl<sub>2</sub>. Triethylamine (2.5 equiv) and chiral diamine (0.5 equiv) were then added and the reaction mixture was stirred for another 12 h. The flask was then opened to the atmosphere and worked up by the addition of saturated aqueous NaHCO<sub>3</sub>. Extraction with CH<sub>2</sub>Cl<sub>2</sub>, followed by drying the combined extracts (Na<sub>2</sub>SO<sub>4</sub>) and concentration in vacuo provided the crude ligand, which was purified as described below.

#### Preparation of Diarylphosphinic Acids:

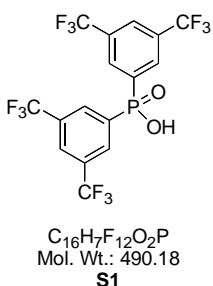

**Bis(3,5-bis(trifluoromethyl)phenyl)phosphinic Acid (S1):** 3,5-Bis(trifluoromethyl)phenyl bromide (18.09 g, 61.7 mmol, 10.5 mL), isopropyl magnesium chloride (34.1 mL, 61.7 mmol, 1.8 M in Et<sub>2</sub>O), *N,N*-dimethylphosphoramidic dichloride (5.0 g, 30.9 mmol, 3.67 mL), 6 M aqueous HCl (30 mL) and THF (150 mL) were combined as described in General Procedure 1. The reaction mixture was then extracted with CH<sub>2</sub>Cl<sub>2</sub>, and the combined extracts were dried over Na<sub>2</sub>SO<sub>4</sub>, concentrated in vacuo and purified by precipitation from THF/hexane solution to give 6.50 g (43%) of **S1** as an off-white powder: IR (solid) cm<sup>-1</sup> 1281, 1135, 674; <sup>1</sup>H NMR (400 MHz, d<sub>6</sub>-DMSO) δ 8.39 (d, *J* = 11.7 Hz, 4 H), 8.23 (s, 4 H), 6.69 (br. s, 1 H); <sup>13</sup>C NMR (101 MHz, d<sub>6</sub>-DMSO) δ 138.5 (d, *J* = 135.7 Hz), 132.2-132.6 (m), 130.9 (qd, *J* = 33.0, 13.2 Hz), 125.8-126.1 (m), 123.4 (q, *J* = 272.9 Hz); <sup>19</sup>F NMR (376 MHz, d<sub>6</sub>-DMSO) δ -60.7; <sup>31</sup>P NMR (162 MHz, d<sub>6</sub>-DMSO) δ 14.0; HRMS (ESI<sup>+</sup>) *m/z* 575.9991 [575.9975 calcd for C<sub>16</sub>H<sub>7</sub>F<sub>12</sub>O<sub>2</sub>P (M+2Na-H+CH<sub>3</sub>CN)<sup>+</sup>].<sup>4</sup>

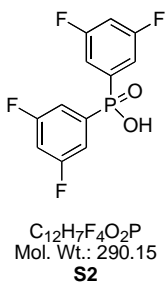

**Bis(3,5-difluorophenyl)phosphinic Acid (S2):** 3,5-Difluorophenyl bromide (7.72 g, 40.0 mmol, 4.6 mL), isopropylmagnesium chloride (22.1 mL, 40 mmol, 1.8 M in Et<sub>2</sub>O), *N,N*-dimethylphosphoramidic dichloride (3.8 g, 30.9 mmol, 2.99 mL), 6 M aqueous HCl (20 mL) and THF (120 mL) were combined as described in General Procedure 1. The reaction mixture was extracted with CH<sub>2</sub>Cl<sub>2</sub>, dried over Na<sub>2</sub>SO<sub>4</sub> and concentrated in vacuo. The product was purified by precipitation from CH<sub>2</sub>Cl<sub>2</sub>/hexane solution to give 1.35 g (10%) of **S2** as a colorless

<sup>4</sup> Acetonitrile from electrospray mass spectrometer.

powder: IR (solid)  $\text{cm}^{-1}$  1584, 1421, 1928, 977;  $^1\text{H}$  NMR (400 MHz,  $\text{d}_6$ -DMSO)  $\delta$  8.77 (br. s, 1 H), 7.39-7.57 (m, 6 H);  $^{13}\text{C}$  NMR (101 MHz,  $\text{d}_6$ -DMSO)  $\delta$  162.7 (ddd,  $J = 250.3, 20.5, 11.0$  Hz), 139.2 (dt,  $J = 138.3, 5.9$  Hz), 114.7 (ddd,  $J = 18.3, 10.2, 8.1$  Hz), 107.9 (t,  $J = 24.9$  Hz);  $^{19}\text{F}$  NMR (376 MHz,  $\text{d}_6$ -DMSO)  $\delta$  -107.1;  $^{31}\text{P}$  NMR (162 MHz,  $\text{d}_6$ -DMSO)  $\delta$  16.9 (t,  $J = 6.9$  Hz); HRMS (ESI $^+$ )  $m/z$  376.0103 [376.0108 calcd for  $\text{C}_{12}\text{H}_7\text{F}_4\text{O}_2\text{P}$  ( $\text{M}+2\text{Na}-\text{H}+\text{CH}_3\text{CN}$ ) $^+$ ].<sup>4</sup>

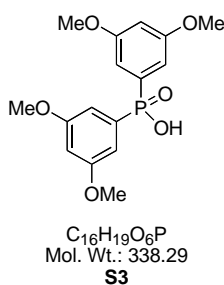

**Bis(3,5-dimethoxyphenyl)phosphinic Acid (S3):** 3,5-Dimethoxyphenyl bromide (4.34 g, 20 mmol), *t*-BuLi (24.2 mL, 40 mmol, 1.65 M in pentane), *N,N*-dimethylphosphoramidic dichloride (1.61 g, 10 mmol, 1.19 mL), 6 M aqueous HCl (10 mL) and THF (100 mL) were combined as described in General Procedure 1 to give a thick, white heterogeneous suspension. The suspension was filtered, and the precipitate was washed with water (50 mL) and Et<sub>2</sub>O (200 mL) to give 2.0 g (74%) of **S3** as a colorless powder: IR (solid)  $\text{cm}^{-1}$  1607, 1409, 1199, 1152;  $^1\text{H}$

NMR (400 MHz,  $\text{d}_6$ -DMSO)  $\delta$  6.78 (dd,  $J = 13.2, 2.2$  Hz, 4 H), 6.61 (t,  $J = 2.2$  Hz, 2 H), 3.72 (s, 12 H);  $^{13}\text{C}$  NMR (101 MHz,  $\text{d}_6$ -DMSO)  $\delta$  160.8 (d,  $J = 18.3$  Hz), 137.3 (d,  $J = 134.2$  Hz), 108.9 (d,  $J = 10.3$  Hz), 103.4 (d,  $J = 1.5$  Hz), 55.8;  $^{31}\text{P}$  NMR (162 MHz,  $\text{d}_6$ -DMSO)  $\delta$  23.0; HRMS (ESI $^+$ )  $m/z$  383.0636 [383.0636 calcd for  $\text{C}_{16}\text{H}_{19}\text{O}_6\text{P}$  ( $\text{M}+2\text{Na}-\text{H}$ ) $^+$ ].

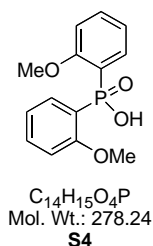

**Di(o-methoxyphenyl)phosphinic Acid (S4):** *O*-methoxyphenyl bromide (3.74 g, 20 mmol), *t*-BuLi (24.2 mL, 40 mmol, 1.65 M in pentane), *N,N*-dimethylphosphoramidic dichloride (1.61 g, 10 mmol, 1.19 mL), 6 M aqueous HCl (10 mL) and THF (100 mL) were combined as described in General Procedure 1 to give a thick, white heterogeneous suspension. The suspension was filtered, and the precipitate was washed with water (50 mL) and Et<sub>2</sub>O (200 mL) to give 2.2 g (79%) of **S4** as a colorless powder: IR (solid)  $\text{cm}^{-1}$  1590, 1479, 1275, 1441, 948;  $^1\text{H}$  NMR

(400 MHz,  $\text{d}_6$ -DMSO)  $\delta$  8.78 (br. s, 1 H), 7.71 (ddd,  $J = 13.7, 7.3, 1.5$  Hz, 2 H), 7.43 (t,  $J = 7.3$  Hz, 2 H), 6.99 (td,  $J = 7.1, 1.7$  Hz, 2 H), 6.92 (dd,  $J = 7.8, 5.9$  Hz, 2 H), 3.47 (s, 6 H);  $^{13}\text{C}$  NMR (101 MHz,  $\text{d}_6$ -DMSO)  $\delta$  160.8 (d,  $J = 3.7$  Hz), 133.7 (d,  $J = 6.6$  Hz), 133.4 (d,  $J = 1.5$  Hz), 123.7 (d,  $J = 141.6$  Hz), 120.3 (d,  $J = 11.7$  Hz), 112.0 (d,  $J = 7.3$  Hz), 55.8;  $^{31}\text{P}$  NMR (162 MHz,  $\text{d}_6$ -DMSO)  $\delta$  19.1; HRMS (ESI $^+$ )  $m/z$  323.0434 [323.0425 calcd for  $\text{C}_{14}\text{H}_{15}\text{O}_4\text{P}$  ( $\text{M}+2\text{Na}-\text{H}$ ) $^+$ ].

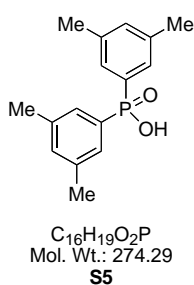

**Bis(3,5-dimethylphenyl)phosphinic Acid (S5):** 3,5-Dimethylphenyl bromide (10.0 g, 54 mmol), *t*-BuLi (65.4 mL, 108 mmol, 1.65 M in pentane), *N,N*-dimethylphosphoramidic dichloride (4.32 g, 27 mmol, 3.21 mL), 6 M aqueous HCl (30 mL) and THF (200 mL) were combined as described in General Procedure 1. The reaction mixture was then extracted with CH<sub>2</sub>Cl<sub>2</sub>, dried over Na<sub>2</sub>SO<sub>4</sub> and concentrated in vacuo. The product was purified by precipitation from CH<sub>2</sub>Cl<sub>2</sub>/hexane solution to give 5.65 g (76%) of **S5** as a colorless powder: IR (solid)  $\text{cm}^{-1}$  2915, 1584, 1275, 1135, 937, 685;

$^1\text{H}$  NMR (400 MHz,  $\text{CD}_2\text{Cl}_2$ )  $\delta$  12.68 (br. s, 1 H), 7.32 (d,  $J = 12.7$  Hz, 4 H), 7.10 (s, 2 H), 2.27 (s, 12 H);  $^{13}\text{C}$  NMR (101 MHz,  $\text{CD}_2\text{Cl}_2$ )  $\delta$  138.1 (d,  $J = 13.9$  Hz), 133.5 (d,  $J = 2.9$  Hz), 132.6 (d,  $J = 137.9$  Hz), 128.5 (d,  $J = 10.3$  Hz), 20.9;  $^{31}\text{P}$  NMR (162 MHz,  $\text{CD}_2\text{Cl}_2$ )  $\delta$  33.4; HRMS (ESI $^+$ )  $m/z$  319.0840 [319.0840 calcd for  $\text{C}_{16}\text{H}_{19}\text{O}_2\text{P}$  ( $\text{M}+2\text{Na}-\text{H}$ ) $^+$ ].

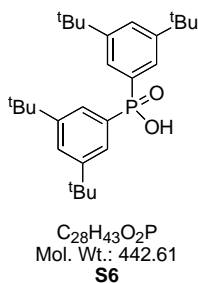

**Bis(3,5-di-*t*-Bu-phenyl)phosphinic Acid (S6):** 3,5-Di-*t*-Bu-phenyl bromide (7.56 g, 28 mmol), *t*-BuLi (39.2 mL, 56 mmol, 1.43 M in pentane), *N,N*-dimethylphosphoramidic dichloride (2.67 g, 14 mmol, 1.27 mL), 6 M aqueous HCl (15 mL) and THF (100 mL) were combined as described in General Procedure 1. The reaction mixture was then extracted with  $\text{CH}_2\text{Cl}_2$ , dried over  $\text{Na}_2\text{SO}_4$  and concentrated in vacuo. The product was purified by flash chromatography (Et $_2$ O/hex) to give 5.44 g (87%) of **S6** as an off-white foamy solid: IR (solid)  $\text{cm}^{-1}$  2961, 2856, 1590, 1357, 1141, 960;  $^1\text{H}$  NMR (400

MHz,  $\text{CD}_2\text{Cl}_2$ )  $\delta$  7.90 (br. s, 1 H), 7.67 (dd,  $J = 13.4, 1.8$  Hz, 4 H), 7.61 (s, 2 H), 1.31 (s, 36 H);  $^{13}\text{C}$  NMR (101 MHz,  $\text{CD}_2\text{Cl}_2$ )  $\delta$  151.0 (d,  $J = 13.2$  Hz), 131.8 (d,  $J = 139.0$  Hz), 126.3 (d,  $J = 2.2$  Hz), 125.1 (d,  $J = 11.7$  Hz), 34.9, 31.1;  $^{31}\text{P}$  NMR (162 MHz,  $d_6$ -DMSO)  $\delta$  36.5; HRMS (ESI $^+$ )  $m/z$  487.2708 [487.2718 calcd for  $\text{C}_{28}\text{H}_{43}\text{O}_2\text{P}$  ( $\text{M}+2\text{Na}-\text{H}$ ) $^+$ ].

### Preparation of Diphosphinic Amide Ligands **3c**, **9-12** and **13a-13i**:

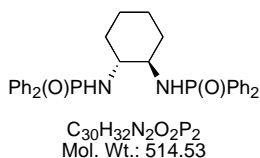

**(*R,R*)-Diphosphinic Amide Ligand **3c**:** In an oven-dried 20 mL vial protected by an atmosphere of  $\text{N}_2$  and equipped with a septum and a magnetic stirbar, diphenylphosphinic chloride (2.07 g, 3.05 mL, 8.75 mmol) was added dropwise to a solution of (*R,R*)-1,2-cyclohexanediamine (500 mg, 4.78 mmol) and  $\text{Et}_3\text{N}$  (2.21 g, 3.05 mL, 21.9 mmol) in  $\text{CH}_2\text{Cl}_2$  (10 mL) at 0  $^\circ\text{C}$ .

The reaction mixture was warmed to 25  $^\circ\text{C}$  and stirred for 2 h, during which time colorless precipitates were observed. The reaction mixture was quenched by the careful addition of saturated aqueous  $\text{NaHCO}_3$  and extracted with  $\text{CH}_2\text{Cl}_2$ . The combined extracts were dried over  $\text{Na}_2\text{SO}_4$  and concentrated in vacuo to give a yellow foam. The product was purified by precipitation from EtOAc/hex solution to give 1.66 g (74%) of **3c** as an extremely fluffy white solid: IR (solid)  $\text{cm}^{-1}$  3181, 2922, 1434, 1185;  $^1\text{H}$  NMR (400 MHz,  $\text{CD}_2\text{Cl}_2$ )  $\delta$  7.99 (ddd,  $J = 11.9, 6.8, 1.3$  Hz, 4 H), 7.81-7.88 (m,  $J = 11.6, 7.1$  Hz, 4 H), 7.46-7.59 (m, 8 H), 7.39 (td,  $J = 7.6, 3.0$  Hz, 4 H), 4.42 (t,  $J = 7.1$  Hz, 2 H), 2.83-2.97 (m, 2 H), 2.07 (d,  $J = 13.4$  Hz, 2 H), 1.58 (d,  $J = 7.8$  Hz, 2 H), 1.32 (q,  $J = 10.4$  Hz, 2 H), 1.12 (t,  $J = 9.9$  Hz, 2 H);  $^{13}\text{C}$  NMR (101 MHz,  $\text{CD}_2\text{Cl}_2$ )  $\delta$  133.66 (d,  $J = 122.9$  Hz), 133.62 (d,  $J = 129.2$  Hz), 131.58 (d,  $J = 2.9$  Hz), 131.55 (d,  $J = 2.9$  Hz), 131.51 (d,  $J = 9.5$  Hz), 132.4 (d,  $J = 9.5$  Hz), 128.34 (d,  $J = 12.4$  Hz), 128.31 (d,  $J = 12.4$  Hz), 56.1, 36.0 (d,  $J = 4.4$  Hz), 25.0;  $^{31}\text{P}$  NMR (162 MHz,  $\text{CD}_2\text{Cl}_2$ )  $\delta$  24.3; HRMS (FAB $^+$ )  $m/z$  515.2010 [515.2017 calcd for  $\text{C}_{30}\text{H}_{32}\text{N}_2\text{O}_2\text{P}_2$  ( $\text{M}+\text{H}$ ) $^+$ ].

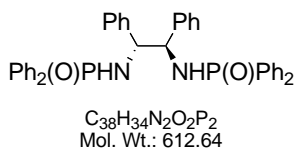

**(*R,R*)-Diphosphinic Amide Ligand 9:** In an oven-dried 20 mL vial protected by an atmosphere of  $N_2$  and equipped with a septum and a magnetic stirbar, diphenylphosphinic chloride (111 mg, 90  $\mu$ L, 470  $\mu$ mol) was added dropwise to a solution of (*R,R*)-1,2-diphenylethylenediamine (50 mg, 235  $\mu$ mol) and  $Et_3N$  (120 mg, 160  $\mu$ L, 1.17 mmol) in  $CH_2Cl_2$  (5 mL) at 25  $^\circ C$ . The reaction mixture was stirred for 12 h, during which time colorless precipitates were observed. The reaction mixture was quenched by the careful addition of saturated aqueous  $NaHCO_3$  and extracted with  $CH_2Cl_2$ . The combined extracts were dried over  $Na_2SO_4$  and concentrated to give a yellow foam. The product was purified by precipitation from  $CH_2Cl_2$ /hexanes solution to give 140 mg (97%) of **9** as a white powder: IR (solid)  $cm^{-1}$  3210, 3056, 1434, 1188, 1108;  $^1H$  NMR (500 MHz,  $CD_2Cl_2$ )  $\delta$  7.77 (dd,  $J = 11.3, 7.9$  Hz, 4 H), 7.61 (dd,  $J = 11.3, 7.9$  Hz, 4 H), 7.53 (t,  $J = 7.0$  Hz, 2 H), 7.33-7.45 (m, 8 H), 7.18-7.28 (m, 4 H), 7.07 (d,  $J = 7.3$  Hz, 4 H), 6.88 (d,  $J = 6.4$  Hz, 4 H), 6.19 (br. s, 2 H), 4.26-4.37 (m, 2 H);  $^{13}C$  NMR (126 MHz,  $CD_2Cl_2$ )  $\delta$  132.70 (d,  $J = 126.2$  Hz), 132.69 (d,  $J = 9.9$  Hz), 131.9 (d,  $J = 133.8$  Hz), 131.7 (d,  $J = 2.4$  Hz), 131.53 (d,  $J = 9.4$  Hz), 131.48 (d,  $J = 2.4$  Hz), 128.2 (d,  $J = 12.7$  Hz), 128.07, 128.05 (d,  $J = 13.2$  Hz), 127.8, 127.5, 126, 61.7;  $^{31}P$  NMR (162 MHz,  $CD_2Cl_2$ )  $\delta$  27.8; HRMS (FAB $^+$ )  $m/z$  613.2188 [613.2173 calcd for  $C_{38}H_{34}N_2O_2P_2$  (M+H) $^+$ ].

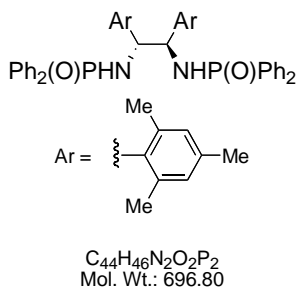

**(*R,R*)-Diphosphinic Amide Ligand 10:** (*R,R*)-1,2-dimesitylethylenediamine (75 mg, 252  $\mu$ mol), chlorodiphenylphosphine (117 mg, 98  $\mu$ L, 531  $\mu$ mol),  $Et_3N$  (128 mg, 176  $\mu$ L, 1.26 mmol), aqueous  $H_2O_2$  (30%, 171  $\mu$ L, 1.51 mmol) and  $CH_2Cl_2$  (4 mL) were combined according to General Procedure 2 to produce a crude oil. The product was isolated by flash chromatography (65:35  $Et_2O$ /hexanes) to provide 152 mg (87%) of **10** as a colorless solid: IR (solid)  $cm^{-1}$  3199, 3064, 2965, 1617, 1434, 1185;  $^1H$  NMR (500 MHz,  $CD_2Cl_2$ )  $\delta$  7.85 (dd,  $J = 11.3, 7.9$  Hz, 4 H), 7.72 (dd,  $J = 11.6, 7.9$  Hz, 4 H), 7.55 (t,  $J = 7.3$  Hz, 2 H), 7.39-7.50 (m, 10 H), 7.28 (td,  $J = 7.6, 3.1$  Hz, 4 H), 6.78 (s, 2 H), 6.30 (s, 2 H), 5.91 (d,  $J = 9.2$  Hz, 2 H), 4.80-4.92 (m, 2 H), 2.68 (s, 6 H), 2.14 (s, 6 H), 0.73 (s, 6 H);  $^{13}C$  NMR (125 MHz,  $CD_2Cl_2$ )  $\delta$  136.9, 136.6, 134.2 (d,  $J = 6.6$  Hz), 133.2 (d,  $J = 125.7$  Hz), 132.9 (d,  $J = 9.4$  Hz), 132.3 (d,  $J = 133.9$  Hz), 131.7 (d,  $J = 7.5$  Hz), 131.6 (d,  $J = 7.5$  Hz), 131.5 (d,  $J = 9.4$  Hz), 130.8, 128.32, 128.31 (d,  $J = 12.2$  Hz), 128.2 (d,  $J = 12.3$  Hz), 53.7 (d,  $J = 1.9$  Hz), 21.4, 20.3, 18.5;  $^{31}P$  NMR (202 MHz,  $CD_2Cl_2$ )  $\delta$  26.7; HRMS (FAB $^+$ )  $m/z$  697.3123 [697.3113 calcd for  $C_{62}H_{96}N_2O_2P_2$  (M+H) $^+$ ].

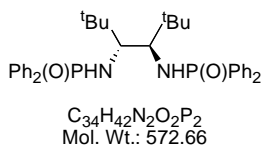

**(R,R)-Diphosphinic Amide Ligand 11:** (*R,R*)-1,2-di-*t*-Bu-ethylenediamine<sup>5</sup> (100 mg, 577  $\mu$ mol), chlorodiphenylphosphine (380 mg, 320  $\mu$ L, 1.73 mmol), Et<sub>3</sub>N (290 mg, 400  $\mu$ L, 2.88 mmol), *t*-BuOOH (5.5 M in decane, 420  $\mu$ L, 2.30 mmol) and CH<sub>2</sub>Cl<sub>2</sub> (6 mL) were combined according to

General Procedure 2 to produce a crude oil. The product was isolated by flash chromatography (40:60 EtOAc/hexanes) then crystallized from hexanes to provide 90 mg (27%) of **11** as colorless needles: IR (solid) cm<sup>-1</sup> 3350, 3280, 2958, 1442, 1108; <sup>1</sup>H NMR (400 MHz, CD<sub>2</sub>Cl<sub>2</sub>)  $\delta$  7.89 (dd, *J* = 11.6, 10.4 Hz, 4H), 7.84 (dd, *J* = 12.0, 10.4 Hz, 4H), 7.39–7.52 (m, 8H), 7.26 (t, *J* = 7.6 Hz, 4H), 4.63 (dd, *J* = 12.0, 5.2 Hz, 2H), 3.06 (t, *J* = 9.2 Hz, 2H), 0.88 (s, 18H); <sup>13</sup>C NMR (100 MHz, CD<sub>2</sub>Cl<sub>2</sub>)  $\delta$  135.7 (d, *J* = 127.0 Hz), 132.5 (d, *J* = 129.0 Hz), 132.4 (d, *J* = 10 Hz), 131.5, 131.3 (d, *J* = 9.0 Hz), 131.2, 128.3 (d, *J* = 13.0 Hz), 128.2 (d, *J* = 12 Hz), 58.6 (d, *J* = 4.0 Hz), 36.8 (d, *J* = 9.0 Hz), 28.1; <sup>31</sup>P NMR (162 MHz, CD<sub>2</sub>Cl<sub>2</sub>)  $\delta$  21.2; HRMS (FAB<sup>+</sup>) *m/z* 573.2801 [573.2800 calcd for C<sub>34</sub>H<sub>42</sub>N<sub>2</sub>O<sub>2</sub>P<sub>2</sub> (M<sup>+</sup>)].

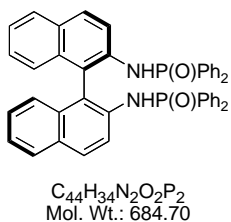

**(R,R)-Diphosphinic Amide Ligand 12:** (*R*)-BINAM (56 mg, 196  $\mu$ mol), chlorodiphenylphosphine (91 mg, 77  $\mu$ L, 413  $\mu$ mol), Et<sub>3</sub>N (100 mg, 137  $\mu$ L, 984  $\mu$ mol), *t*-BuOOH (5.5 M in decane, 200  $\mu$ L) and CH<sub>2</sub>Cl<sub>2</sub> (4 mL) were combined according to General Procedure 2 to produce a crude oil. The product was isolated by flash chromatography (50:50 Et<sub>2</sub>O/hexanes) and then crystallized

by slow diffusion of hexanes into a toluene solution to provide 94 mg (70%) of **12** as colorless prisms: IR (solid) cm<sup>-1</sup> 3354, 3058, 1623, 1583, 1211; <sup>1</sup>H NMR (500 MHz, CD<sub>2</sub>Cl<sub>2</sub>)  $\delta$  7.90 (d, *J* = 6.1 Hz, 2 H), 7.82 (d, *J* = 9.2 Hz, 2 H), 7.62–7.72 (m, 6 H), 7.31–7.50 (m, 18 H), 7.29 (d, *J* = 7.6 Hz, 2 H), 7.12–7.21 (m, 4 H); <sup>13</sup>C NMR (125 MHz, CD<sub>2</sub>Cl<sub>2</sub>)  $\delta$  138.0, 132.7, 132.2 (d, *J* = 129.0 Hz), 132.1 (d, *J* = 128.0 Hz), 132.0 (d, *J* = 2.8 Hz), 131.9 (d, *J* = 2.4 Hz), 131.6 (d, *J* = 9.9 Hz), 131.0 (d, *J* = 9.9 Hz), 130.0, 129.8, 128.7 (d, *J* = 12.7 Hz), 128.6 (d, *J* = 12.5 Hz), 128.5, 127.5, 124.5, 124.4, 119.0 (d, *J* = 3.8 Hz), 116.9 (d, *J* = 8.0 Hz); <sup>31</sup>P NMR (162 MHz, CD<sub>2</sub>Cl<sub>2</sub>)  $\delta$  15.8; HRMS (FAB<sup>+</sup>) *m/z* 685.2171 [685.2174 calcd for C<sub>62</sub>H<sub>96</sub>N<sub>2</sub>O<sub>2</sub>P<sub>2</sub> (M+H<sup>+</sup>)].

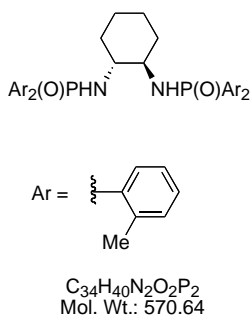

**(R,R)-Diphosphinic Amide Ligand 13a:** (*R,R*)-1,2-cyclohexanediamine (50 mg, 437  $\mu$ mol), chlorodi(*o*-tolyl)phosphine (228 mg, 919  $\mu$ mol), Et<sub>3</sub>N (443 mg, 610  $\mu$ L, 4.37 mmol), *t*-BuOOH (5.5 M in decane, 310  $\mu$ L, 1.78 mmol) and CH<sub>2</sub>Cl<sub>2</sub> (10 mL) were combined according to General Procedure 2 to produce a crude oil. The product was purified by precipitation from CH<sub>2</sub>Cl<sub>2</sub>/hexane solution to provide 92 mg (37%) of **13a** as a colorless powder: IR (solid) cm<sup>-1</sup> 3467, 3178, 2942, 2853, 1560, 1455, 1163; <sup>1</sup>H NMR (500 MHz, CD<sub>2</sub>Cl<sub>2</sub>)  $\delta$  7.98 (dd, *J* = 13.4, 7.6 Hz, 2 H), 7.59 (dd, *J* = 12.5, 7.9 Hz, 2 H),

7.35–7.44 (m, 4 H), 7.28–7.34 (m, 2 H), 7.08–7.22 (m, 6 H), 4.49–4.56 (m, 2 H), 3.13–3.23 (m, 2 H), 2.32 (s, 6 H), 2.24 (s, 6 H), 2.19 (d, *J* = 12.8 Hz, 2 H), 1.55–1.68 (m, 2 H), 1.40

<sup>5</sup> Roland, S.; Mangeney, P.; Alexakis, A. *Synthesis* **1999**, 228-230.

(q,  $J = 10.1$  Hz, 2 H), 1.21 (t,  $J = 9.8$  Hz, 2 H);  $^{13}\text{C}$  NMR (125 MHz,  $\text{CD}_2\text{Cl}_2$ , one aromatic signal partially obscured)  $\delta$  142.0 (d,  $J = 10.8$  Hz), 141.4 (d,  $J = 9.9$  Hz), 133.2 (d,  $J = 9.9$  Hz), 132.7 (d,  $J = 10.4$  Hz), 131.5 (d,  $J = 118.2$  Hz), 131.43, 131.42, 131.41 (d,  $J = 7.6$  Hz), 131.3 (d,  $J = 6.1$  Hz), 125.2 (d,  $J = 12.2$  Hz), 125.1 (d,  $J = 12.2$  Hz), 56.4 (d,  $J = 3.8$  Hz), 35.7 (d,  $J = 2.8$  Hz), 25.1, 21.2 (d,  $J = 3.8$  Hz), 21.1 (d,  $J = 3.8$  Hz);  $^{31}\text{P}$  NMR (162 MHz,  $\text{CD}_2\text{Cl}_2$ )  $\delta$  26.7; HMRS (FAB $^+$ )  $m/z$  571.2652 [571.2643 calcd for  $\text{C}_{34}\text{H}_{40}\text{N}_2\text{O}_2\text{P}_2$  (M+H $^+$ )].

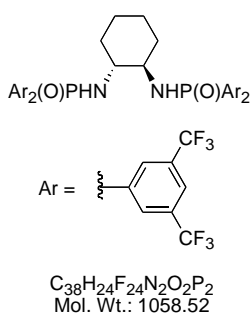

**(*R,R*)-Diphosphinic Amide Ligand 13b:** Bis(bis(3,5-trifluoromethyl)phenyl)phosphinic acid (1.0 g, 2.04 mmol),  $\text{SOCl}_2$  (10 mL), (*R,R*)-1,2-cyclohexanediamine (116 mg, 1.02 mmol),  $\text{Et}_3\text{N}$  (516 mg, 710  $\mu\text{L}$ , 5.10 mmol), and  $\text{CH}_2\text{Cl}_2$  (10 mL) were combined according to General Procedure 3 to provide a light brown solid. The product was dissolved in  $\text{Et}_2\text{O}$  and filtered through a short plug of silica gel. The silica was washed with  $\text{Et}_2\text{O}$ , and the resulting solution was concentrated. The product was further purified by precipitation from  $\text{Et}_2\text{O}$ /hexanes solution to provide 618 mg (57%) of **13b** as a

colorless powder: IR (solid)  $\text{cm}^{-1}$  3174, 2932, 1621, 1456, 1360, 1277, 1119;  $^1\text{H}$  NMR (400 MHz,  $\text{CD}_2\text{Cl}_2$ )  $\delta$  8.45 (d,  $J = 12.0$  Hz, 4 H), 8.32 (d,  $J = 11.7$  Hz, 4 H), 8.08 (d,  $J = 14.2$  Hz, 4 H), 4.80-4.98 (m, 2 H), 2.80-2.98 (m, 2 H), 1.92 (d,  $J = 13.0$  Hz, 2 H), 1.60 (d,  $J = 8.3$  Hz, 2 H), 1.33-1.47 (m, 2 H), 1.05 (t,  $J = 9.5$  Hz, 2 H);  $^{13}\text{C}$  NMR (101 MHz,  $\text{CD}_2\text{Cl}_2$ )  $\delta$  135.1 (d,  $J = 135.0$  Hz), 134.7 (d,  $J = 128.2$  Hz), 132.8-133.1 (m), 132.3 (t,  $J = 12.5$  Hz), 131.9 (t,  $J = 12.5$  Hz), 131.5-131.8 (m), 126.1-126.5 (m), 122.9 (q,  $J = 272.2$  Hz), 122.7 (q,  $J = 272.2$  Hz), 56.6, 35.6 (d,  $J = 5.9$  Hz), 24.7;  $^{31}\text{P}$  NMR (162 MHz,  $\text{CD}_2\text{Cl}_2$ )  $\delta$  20.2;  $^{19}\text{F}$  NMR (376 MHz,  $\text{CD}_2\text{Cl}_2$ )  $\delta$  -62.57, -62.65; LRMS (FAB $^+$ )  $m/z$  1059 (M+H $^+$ ).

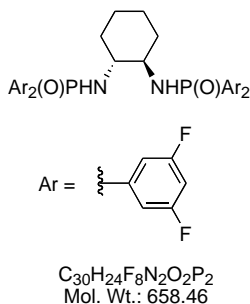

**(*R,R*)-Diphosphinic Amide Ligand 13c:** Bis(3,5-difluorophenyl)phosphinic acid (300 mg, 1.03 mmol),  $\text{SOCl}_2$  (5 mL), (*R,R*)-1,2-cyclohexanediamine (59 mg, 516  $\mu\text{mol}$ ),  $\text{Et}_3\text{N}$  (253 mg, 350  $\mu\text{L}$ , 2.5 mmol), and  $\text{CH}_2\text{Cl}_2$  (5 mL) were combined according to General Procedure 3 to provide a light brown solid. The product was purified by flash chromatography (90:10 hexanes/ $\text{Et}_2\text{O}$ ) to provide 165 mg (49%) of **13c** as a colorless solid: IR (solid)  $\text{cm}^{-1}$  3150, 2907, 2852, 1613, 1591,

1420, 1298, 1999, 1121;  $^1\text{H}$  NMR (400 MHz,  $\text{CD}_2\text{Cl}_2$ )  $\delta$  7.51 (ddt,  $J = 12.9, 5.6, 2.3$  Hz, 4H), 7.02 (ddt,  $J = 12.6, 5.6, 2.3$  Hz, 4H), 6.96-7.09 (m, 4 H), 4.79-4.87 (m, 2 H), 2.91-3.01 (m, 1 H), 2.02 (d,  $J = 14.4$  Hz, 2 H), 1.59-1.68 (m, 2 H), 1.38 (q,  $J = 9.3$  Hz, 6 H), 1.15 (t,  $J = 10.1$  Hz, 2 H);  $^{13}\text{C}$  NMR (100 MHz,  $\text{CD}_2\text{Cl}_2$ )  $\delta$  164.2 (dt,  $J = 24.9, 11.7$  Hz), 161.7 (ddd,  $J = 21.2, 13.2, 11.0$  Hz), 136.8 (dt,  $J = 133.9, 7.3$  Hz), 136.2 (dt,  $J = 126.8, 7.3$  Hz), 115.4 (ddd,  $J = 18.3, 10.2$  Hz), 114.4 (dt,  $J = 18.3, 10.3$  Hz), 107.5 (d,  $J = 24.9$  Hz), 107.8 (d,  $J = 25.6$  Hz), 56.2, 35.6 (d,  $J = 4.4$  Hz), 24.9;  $^{31}\text{P}$  NMR (162 MHz,  $\text{CD}_2\text{Cl}_2$ )  $\delta$  21.0 (td,  $J = 13.8, 5.9$  Hz);  $^{19}\text{F}$  NMR (376 MHz,  $\text{CD}_2\text{Cl}_2$ )  $\delta$  -107.04 (q,  $J = 8.2$  Hz), -107.26 (q,  $J = 8.3$  Hz); HRMS (FAB $^+$ )  $m/z$  659.1255 [659.1264 calcd for  $\text{C}_{30}\text{H}_{24}\text{F}_8\text{N}_2\text{O}_2\text{P}_2$  (M+H $^+$ )].



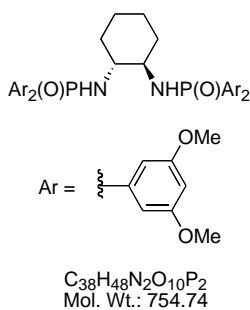

**(*R,R*)-Diphosphinic Amide Ligand 13d:** Bis(3,5-dimethoxyphenyl)phosphinic acid (676 mg, 2.0 mmol),  $SOCl_2$  (10 mL), (*R,R*)-1,2-cyclohexanediamine (114 mg, 1.0 mmol),  $Et_3N$  (506 mg, 700  $\mu$ L, 5.0 mmol), and  $CH_2Cl_2$  (10 mL) were combined according to General Procedure 3 to provide a light brown solid. The product was purified by flash chromatography ( $EtOAc$ ) to provide 660 mg (89%) of **13d** as a tan foamy solid: IR (film)  $cm^{-1}$  3174, 2930, 2833, 1587, 1447, 1423, 1151;  $^1H$  NMR (500 MHz,  $CD_2Cl_2$ )  $\delta$  7.15 (d,  $J = 13.4$  Hz, 4 H), 7.02 (d,  $J = 12.8$  Hz, 4 H), 6.61 (s, 2 H), 6.55 (s, 2 H), 4.57-4.67 (m, 2 H), 3.84 (s, 12 H), 3.75 (s, 12 H), 2.89-3.03 (m, 2 H), 2.11 (d,  $J = 12.5$  Hz, 2 H), 1.52-1.63 (m, 2 H), 1.35 (q,  $J = 9.2$  Hz, 2 H), 1.13 (t,  $J = 8.9$  Hz, 2 H);  $^{13}C$  NMR (125 MHz,  $CD_2Cl_2$ )  $\delta$  160.8 (d,  $J = 18.4$  Hz), 135.6 (d,  $J = 130.5$  Hz), 135.5 (d,  $J = 123.9$  Hz), 109.9 (d,  $J = 10.4$  Hz), 109.0 (d,  $J = 10.8$  Hz), 103.8, 103.4, 56.2, 55.4, 35.7 (d,  $J = 3.8$  Hz), 25.0;  $^{31}P$  NMR (162 MHz,  $CD_2Cl_2$ )  $\delta$  24.9; HRMS (FAB $^+$ )  $m/z$  755.2869 [755.2862 calcd for  $C_{38}H_{48}N_2O_{10}P_2$  ( $M+H^+$ )].

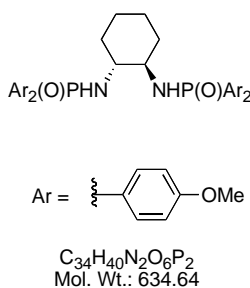

**(*R,R*)-Diphosphinic Amide Ligand 13e:** Using a modification of General Procedure 3, di(*p*-methoxyphenyl)phosphinic acid (2.5 g, 8.9 mmol) was heated at reflux in  $SOCl_2$  (15 mL) for 1 h. After concentration, the resulting oil was distilled bulb-to-bulb (300  $^{\circ}C$ , 0.4 mmHg) to provide *ca.* 2 g of the phosphinic chloride as a thick yellow oil, which was used without further purification. A portion of the phosphinic chloride (1.10 g, 3.70 mmol) was transferred to an oven-dried 100 mL round bottom flask via pipet and dissolved in  $CH_2Cl_2$  (15 mL). Triethylamine (750 mg, 1.03 mL, 7.40 mmol) and (*R,R*)-1,2-cyclohexanediamine (212 mg, 1.89 mmol) were then added sequentially, and the reaction mixture was stirred for 12 h. Saturated aqueous  $NaHCO_3$  (10 mL) was added to quench the reaction. Extraction with  $CH_2Cl_2$ , followed by drying the combined extracts over  $Na_2SO_4$  and concentration, gave an oily solid. The product was purified by precipitation from  $CH_2Cl_2/Et_2O$  solution to provide 1.05 g (89%) of **13e** as a fluffy, colorless solid: IR (solid)  $cm^{-1}$  3192, 2921, 2844, 1595, 1500, 1159, 1122;  $^1H$  NMR (500 MHz,  $CDCl_3$ )  $\delta$  7.87 (dd,  $J = 11.3, 8.9$  Hz, 4 H), 7.74 (dd,  $J = 11.0, 8.9$  Hz, 4 H), 6.98 (d,  $J = 6.4$  Hz, 4 H), 6.87 (d,  $J = 6.7$  Hz, 4 H), 4.15-4.28 (m, 2 H), 3.85 (s, 6 H), 3.81 (s, 6 H), 2.71-2.87 (m, 2 H), 2.02 (d,  $J = 12.5$  Hz, 2 H), 1.50-1.59 (m, 2 H), 1.21-1.31 (m, 2 H), 1.09 (t,  $J = 9.5$  Hz, 2 H);  $^{13}C$  NMR (126 MHz,  $CDCl_3$ )  $\delta$  162.2 (d,  $J = 2.4$  Hz), 162.1 (d,  $J = 2.8$  Hz), 134.1 (d,  $J = 10.8$  Hz), 133.3 (d,  $J = 10.8$  Hz), 125.4 (d,  $J = 131.4$  Hz), 125.0 (d,  $J = 135.0$  Hz), 113.7 (d,  $J = 8.9$  Hz), 113.6 (d,  $J = 8.5$  Hz), 55.9, 55.3, 55.2, 36.0 (d,  $J = 3.3$  Hz), 25.1;  $^{31}P$  NMR (162 MHz,  $CDCl_3$ )  $\delta$  24.4; HRMS (FAB $^+$ )  $m/z$  635.2441 [635.2440 calcd for  $C_{34}H_{40}N_2O_6P_2$  ( $M+H^+$ )].

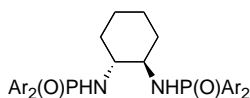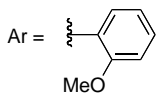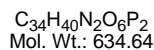

**(*R,R*)-Diphosphinic Amide Ligand 13f:** Di(*o*-methoxyphenyl)phosphinic acid (556 mg, 2.0 mmol),  $SOCl_2$  (10 mL), (*R,R*)-1,2-cyclohexanediamine (114 mg, 1.0 mmol),  $Et_3N$  (506 mg, 700  $\mu$ L, 5.0 mmol), and  $CH_2Cl_2$  (10 mL) were combined according to General Procedure 3 to provide a light brown solid. The product was purified by flash chromatography, first with  $CH_2CH_2/MeOH$ , then with acetone/ $EtOAc$  to provide 121 mg (19%) of **13f** as a tan foamy solid: IR (film)  $cm^{-1}$  3367, 2939, 2853, 1591, 1479, 1279, 1243;  $^1H$  NMR (500 MHz,  $CD_2Cl_2$ )  $\delta$  7.87 (dd,  $J = 13.7, 7.3$  Hz, 2 H), 7.73-7.80 (m,  $J = 14.0, 7.6$  Hz, 2 H), 7.42 (t,  $J = 7.3$  Hz, 2 H), 7.37 (t,  $J = 7.6$  Hz, 2 H), 7.03 (t,  $J = 7.0$  Hz, 2 H), 6.79-6.88 (m, 4 H), 6.74 (t,  $J = 7.3$  Hz, 2 H), 4.04-4.19 (m, 2 H), 3.61 (s, 6 H), 3.48 (s, 6 H), 3.15-3.27 (m, 2 H), 2.03 (d,  $J = 9.8$  Hz, 2 H), 1.50-1.62 (m, 2 H), 1.15-1.33 (m, 4 H);  $^{13}C$  NMR (125 MHz,  $CD_2Cl_2$ )  $\delta$  160.2 (d,  $J = 3.8$  Hz), 160.0 (d,  $J = 3.8$  Hz), 133.6 (d,  $J = 7.1$  Hz), 133.4 (d,  $J = 7.1$  Hz), 132.5, 125.1 (d,  $J = 124.8$  Hz), 123.3 (d,  $J = 125.3$  Hz), 120.2 (d,  $J = 12.2$  Hz), 120.1 (d,  $J = 11.9$  Hz), 110.9 (d,  $J = 2.4$  Hz), 110.9 (d,  $J = 2.4$  Hz), 55.3, 55.3, 55.2, 35.7, 25.1;  $^{31}P$  NMR (162 MHz,  $CD_2Cl_2$ )  $\delta$  21.2; HRMS (FAB<sup>+</sup>)  $m/z$  635.2447 [635.2440 calcd for  $C_{34}H_{40}N_2O_6P_2$  (M+H<sup>+</sup>)].

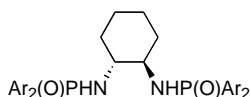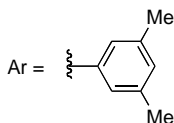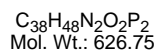

**(*R,R*)-Diphosphinic Amide Ligand 13g.** (This ligand has been prepared in two ways. Both procedures are presented.)

**Method A:** (*R,R*)-1,2-cyclohexanediamine (706 mg, 6.18 mmol), chlorodi(3,5-dimethylphenyl)phosphine (3.51 g, 12.9 mmol),  $Et_3N$  (6.26 g, 8.62 mL, 61.8 mmol), *t*-BuOOH (5.5 M in decane, 4.5 mL, 24.7 mmol) and  $CH_2Cl_2$  (100 mL) were combined according to General Procedure 2 to produce a crude solid. The product was purified by flash chromatography (60:40  $Et_2O/CH_2Cl_2$ ) to provide 1.74 g (45%) of **13g** as an off-white, foamy solid. **Method B:** Di(3,5-dimethylphenyl)phosphinic acid (3.0 g, 10.9 mmol),  $SOCl_2$  (20 mL), (*R,R*)-1,2-cyclohexanediamine (624 mg, 5.46 mmol),  $Et_3N$  (2.76 g, 3.8 mL, 27.3 mmol), and  $CH_2Cl_2$  (50 mL) were combined according to General Procedure 3 to provide a light brown solid. The product was purified by flash chromatography (60:40  $Et_2O/CH_2Cl_2$ ) to provide 2.73 g (80%) of **13g** as a colorless solid: IR (solid)  $cm^{-1}$  3189, 2925, 2859, 1603, 1448, 1189;  $^1H$  NMR (400 MHz,  $CDCl_3$ )  $\delta$  7.63 (d,  $J = 12.4$  Hz, 4 H), 7.47 (d,  $J = 12.1$  Hz, 4 H), 7.15 (s, 2 H), 7.10 (s, 2 H), 4.31 (br. s, 2 H), 2.93-3.12 (m, 2 H), 2.38 (s, 12 H), 2.28 (s, 12 H), 2.04 (d,  $J = 12.6$  Hz, 2 H), 1.57 (d,  $J = 7.8$  Hz, 2 H), 1.24-1.37 (m, 2 H), 1.12 (t,  $J = 9.6$  Hz, 2 H);  $^{13}C$  NMR (126 MHz,  $CDCl_3$ )  $\delta$  137.9 (d,  $J = 13.2$  Hz), 137.8 (d,  $J = 13.4$  Hz), 133.4 (d,  $J = 2.4$  Hz), 133.3 (d,  $J = 2.8$  Hz), 133.0 (d,  $J = 128.1$  Hz), 132.7 (d,  $J = 126.0$  Hz), 130.1 (d,  $J = 9.9$  Hz), 129.0 (d,  $J = 9.9$  Hz), 55.8 (d,  $J = 1.4$  Hz), 35.8 (d,  $J = 2.4$  Hz), 25.0, 21.3, 21.2;  $^{31}P$  NMR (162 MHz,  $CD_2Cl_2$ )  $\delta$  26.4; HRMS (FAB<sup>+</sup>)  $m/z$  627.3266 [627.3269 calcd for  $C_{38}H_{48}N_2O_6P_2$  (M+H<sup>+</sup>)].

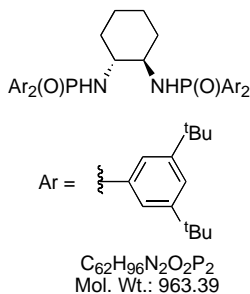

**(*R,R*)-Diphosphinic Amide Ligand 13h.** Bis(3,5-di-*t*-Bu-phenyl)phosphinic acid (5.44 g, 12.3 mmol), SOCl<sub>2</sub> (20 mL), (*R,R*)-1,2-cyclohexanediamine (701 mg, 6.13 mmol), Et<sub>3</sub>N (3.10 g, 4.3 mL, 30.7 mmol), and CH<sub>2</sub>Cl<sub>2</sub> (50 mL) were combined according to General Procedure 3 to provide a light brown solid. The product was purified by flash chromatography (50:50 Et<sub>2</sub>O/hexanes) to provide 4.90 g (83%) of **13h** as an off-white foamy solid: IR (solid) cm<sup>-1</sup> 3189, 2958, 2859, 1602, 1247, 1178, 1119; <sup>1</sup>H NMR (500 MHz, CD<sub>2</sub>Cl<sub>2</sub>, one aliphatic signal not observed) δ 7.86 (d, *J* =

12.5 Hz, 4 H), 7.77 (d, *J* = 12.2 Hz, 4 H), 7.56 (d, *J* = 10.0 Hz, 4 H), 2.87 (s, 2 H), 2.14 (d, *J* = 12.5 Hz, 2H), 1.55 (m, 2 H), 1.36 (s, 36 H), 1.29 (s, 36 H), 1.08 (t, *J* = 10.0 Hz, 2 H); <sup>13</sup>C NMR (125 MHz, CD<sub>2</sub>Cl<sub>2</sub>) δ 150.8 (d, *J* = 12.0 Hz), 150.7 (d, *J* = 12.0 Hz), 133.6 (d, *J* = 32.5 Hz), 132.6 (d, *J* = 37.5 Hz), 126.4 (d, *J* = 9.9 Hz), 125.6 (d, *J* = 10.4 Hz), 125.4 (d, *J* = 2.4 Hz), 56.5 (d, *J* = 2.8 Hz), 35.8 (d, *J* = 3.3 Hz), 34.9 (d, *J* = 7.5 Hz), 31.1 (d, *J* = 3.3 Hz), 25.0; <sup>31</sup>P NMR (162 MHz, CD<sub>2</sub>Cl<sub>2</sub>) δ 25.5; HRMS (FAB<sup>+</sup>) *m/z* 963.7011 [963.7025 calcd for C<sub>62</sub>H<sub>96</sub>N<sub>2</sub>O<sub>2</sub>P<sub>2</sub> (M+H<sup>+</sup>)].

### Ligand Screening Experiments (Tables 1 and 2):

In a glovebox, ligand (22 μmol, solid) and a solution of M(NMe<sub>2</sub>)<sub>4</sub> (20 μmol, 500 μL, 40.0 mM in toluene) were combined in an oven-dried 4 mL (1 dram) vial equipped with an oven-dried stirbar. The vial was sealed<sup>6</sup> and heated<sup>7</sup> for 15 min. The vial was cooled to 25 °C and substrate **1** (15 μL, 11.4 mg, 100 μmol) was added. The vial was resealed and heated for the specified time. The vial was cooled to 25 °C, removed from the glovebox, and opened to the atmosphere. While rapidly stirring the reaction mixture, trifluoroacetic anhydride (50 μL) was added, and the resulting solution was stirred for 5 min. Saturated aqueous Na<sub>2</sub>CO<sub>3</sub> (200 μL) was then added, and the resulting suspension was stirred for 1 min. This suspension was then transferred to a 4 mL solid phase extraction (SPE) column (containing approx. 1 g anhydrous MgSO<sub>4</sub> atop approx. 0.25 g silica gel)<sup>8</sup> via pipet,

<sup>6</sup> Vials were sealed using specific caps designed to withstand elevated pressure (Kontes Mini-Inert Valve, size 21, Kontes Article Number 749110-0021). Other caps did not perform as well.

<sup>7</sup> The reactions were heated in an aluminum block set atop a digitally controlled heating magnetic stirrer. Temperature was controlled using a thermocouple controller placed in a hole bored to the diameter of the thermocouple end. The vials were placed in holes bored to the diameter of the vial (15 mm) and to a depth of the shoulder of the vial (35 mm). This depth proved critical in order to minimize non-heated surface area in the vial and prevent solvent reflux at temperatures lower than that of the aluminum block.

<sup>8</sup> For convenience, common household English Standard measuring spoons were used to measure packing materials for SPE columns. For the anhydrous MgSO<sub>4</sub>, 3/8<sup>th</sup> of an teaspoon was used; for silica gel, 1/8<sup>th</sup> teaspoon was used. These materials, silica then MgSO<sub>4</sub>, were added to the SFE columns in layers using a small funnel and packed down using vacuum (ca. 15 mm Hg).

filtered and washed with EtOAc (3 mL). The filtrate was collected into 2 mL auto-sampler vials<sup>9</sup> and analyzed directly by chiral GC. Conversion was determined by comparison of the area of the sum of the two enantiomers to that of the starting material.

### Cyclization Experiments, GC Analysis (Table 3, Entries 1-6):

In a glovebox, a solution of ligand **13g** (10  $\mu$ mol, 100  $\mu$ L, 0.1 M in toluene), a solution of  $\text{Zr}(\text{NMe}_2)_4$  (10  $\mu$ mol, 100  $\mu$ L, 0.1 M in toluene) and 200  $\mu$ L of toluene were combined in an oven-dried 4-mL (1 dram) vial equipped with an oven-dried stirbar.<sup>10</sup> The vial was sealed<sup>6</sup> and heated<sup>7</sup> for 15 min. The vial was cooled to 25  $^\circ\text{C}$  and a standard solution<sup>11</sup> of the substrate amine and hexamethylbenzene in toluene (100  $\mu$ L, 1.0 M amine, 100  $\mu$ mol amine) was added. The vial was resealed and heated for the specified time. The vial was then cooled to 25  $^\circ\text{C}$ , removed from the glovebox, and opened to the atmosphere. To this rapidly stirred solution, trifluoroacetic anhydride (50  $\mu$ L) was added, and the resulting solution was stirred for 5 min. Saturated aqueous  $\text{Na}_2\text{CO}_3$  (200  $\mu$ L) was then added, and the resulting suspension was stirred for 1 min. This suspension was then transferred to a 4-mL solid phase extraction (SPE) column (containing approx. 1 g anhydrous  $\text{MgSO}_4$  atop approx. 0.25 g silica gel)<sup>8</sup> via pipet, filtered and washed with EtOAc (2 mL). The filtrate was collected into 2 mL auto-sampler vials<sup>9</sup> and analyzed directly by chiral GC. For internal standard calibration, 100  $\mu$ L of the standard amine solution (see above) was diluted to 500  $\mu$ L using toluene and worked up in the same fashion as the reaction mixture. This latter solution was then analyzed under chiral GC conditions identical to those used for analysis of the reaction mixture.

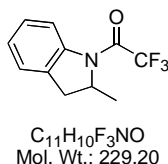

**Amide 18, Isolated Yield.** A solution of ligand **13g** (88.3  $\mu$ mol, 883  $\mu$ L, 0.1 M in toluene) and a solution of  $\text{Zr}(\text{NMe}_2)_4$  (88.3  $\mu$ mol, 883  $\mu$ L, 0.1 M in toluene) were combined in an oven-dried 4 mL (1 dram) vial equipped with an oven-dried stir bar. The vial was sealed and heated to 135  $^\circ\text{C}$  for 15 min. The vial was allowed to cool to room temperature, and a solution of substrate amine (442  $\mu$ mol, 442  $\mu$ L, 1.0 M in toluene) was added. The vial was re-sealed and heated to 135  $^\circ\text{C}$  for 48 h. The vial was then cooled to 25  $^\circ\text{C}$  and removed from the glovebox. The reaction mixture was transferred to a 20 mL scintillation vial. Trifluoroacetic anhydride (185 mg, 123  $\mu$ L, 883  $\mu$ mol) was added, and the resulting mixture was stirred 15 min at 25  $^\circ\text{C}$ . The reaction mixture was quenched by adding saturated  $\text{Na}_2\text{CO}_3$  (3 mL). The organic layer was washed with brine (1 x 3 mL), dried over  $\text{MgSO}_4$ , filtered, and concentrated to provide a brown oil. The product was purified by flash chromatography to yield 88 mg (85%) of **18** as a yellow oil: IR (film) 2971,

<sup>9</sup> A standard 12-port solid phase extraction vacuum manifold was used.

<sup>10</sup> For reactions involving 20 mol% catalyst, 200  $\mu$ L each of the ligand and  $\text{Zr}(\text{NMe}_2)_4$  were used. No additional solvent was added.

<sup>11</sup> The standard solution of amine containing hexamethylbenzene as an internal standard was prepared in a 1.0 mL volumetric flask using amine (1.0 mmol), hexamethylbenzene (15 mg), and toluene (to make 1 mL total volume).

1683, 1482, 1137;  $^1\text{H}$  NMR (400 MHz,  $\text{CDCl}_3$ )  $\delta$  8.03 (d,  $J = 8$  Hz, 1 H), 7.17-7.21 (m, 2 H), 7.06-7.10 (m, 1 H), 4.72 (m, 1 H), 3.38 (dd,  $J = 13$  Hz, 24 Hz, 1 H), 2.63 (d,  $J = 16$  Hz, 1 H), 1.24 (d,  $J = 6$  Hz, 3 H);  $^{13}\text{C}$  NMR (101 MHz,  $\text{CDCl}_3$ )  $\delta$  154.3 (q,  $J = 27$  Hz), 140.2, 131.2, 128.3, 127.7, 126.0, 125.4, 119.4, 116.3 (q,  $J = 289$  Hz), 56.8, 36.9, 21.9;  $^{19}\text{F}$  NMR (376 MHz,  $\text{C}_6\text{D}_6$ )  $\delta$  -69.9; HRMS (ESI $^+$ )  $m/z$  252.0608 [252.0612 calcd for  $\text{C}_{11}\text{H}_{10}\text{F}_3\text{NO}$  (M+Na) $^+$ ].

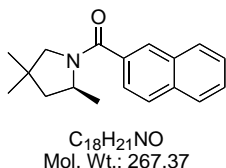

**Amide 19.** A solution of ligand **13g** (88.3  $\mu\text{mol}$ , 883  $\mu\text{L}$ , 0.1 M in toluene), a solution of  $\text{Zr}(\text{NMe}_2)_4$  (88.3  $\mu\text{mol}$ , 883  $\mu\text{L}$ , 0.1 M in toluene) and 883  $\mu\text{L}$  of toluene were combined in an oven-dried 4 mL (1 dram) vial equipped with an oven-dried stir bar. The vial was sealed and heated to 115  $^\circ\text{C}$  for 15 min. The vial was cooled to 25  $^\circ\text{C}$ , and a solution of substrate amine (883  $\mu\text{mol}$ , 883  $\mu\text{L}$ , 1.0 M in toluene) was added. The vial was re-sealed and heated at 115  $^\circ\text{C}$  for 48 h. The vial was then cooled to 25  $^\circ\text{C}$  and removed from the glovebox. The reaction mixture was transferred to a 20 mL scintillation vial. Triethylamine (134 mg, 184  $\mu\text{L}$ , 1.33 mmol) and 2-naphthoyl chloride (168 mg, 883  $\mu\text{mol}$ ) were added, and the resulting suspension was stirred for 2 h at 25  $^\circ\text{C}$ . The reaction mixture was filtered and washed with saturated  $\text{NaHCO}_3$  (2 x 3 mL). The organic layer was washed with brine (1 x 3 mL), dried over  $\text{MgSO}_4$ , filtered, and concentrated to provide a brown oil. The product was purified by flash chromatography to yield 184 mg (78%) of **19** as grainy, colorless crystals: IR (solid)  $\text{cm}^{-1}$  2957, 2926, 2867, 1619, 1406;  $^1\text{H}$  NMR (400 MHz,  $\text{CD}_2\text{Cl}_2$ , multiple rotamers observed in solution; major peaks reported)  $\delta$  7.89-8.04 (m, 4 H), 7.52-7.64 (m, 3 H), 4.39 (m, 1 H), 3.39 (d,  $J = 12$  Hz, 1 H), 3.22 (d,  $J = 12$  Hz, 1 H), 1.98 (dd,  $J = 12$  Hz, 7 Hz, 1 H), 1.47 (dd,  $J = 16$  Hz, 12 Hz, 1 H), 1.43 (d,  $J = 6$  Hz, 3 H), 1.05 (s, 3 H), 0.81 (s, 3 H);  $^{13}\text{C}$  NMR (101 MHz,  $\text{CD}_2\text{Cl}_2$ )  $\delta$  169.7, 134.8, 133.8, 132.5, 128.4, 128.3, 127.8, 127.6, 127.2, 127.0, 126.5, 62.6, 47.4, 38.2, 25.4, 25.2, 20.0; HRMS (ESI $^+$ )  $m/z$  268.1696 [268.1701 calcd for  $\text{C}_{18}\text{H}_{21}\text{NO}$  (M+H) $^+$ ].

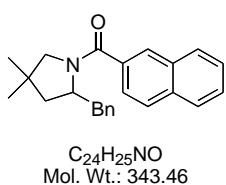

**Amide 20.** A solution of ligand **13g** (88.3  $\mu\text{mol}$ , 883  $\mu\text{L}$ , 0.1 M in toluene) and a solution of  $\text{Zr}(\text{NMe}_2)_4$  (88.3  $\mu\text{mol}$ , 883  $\mu\text{L}$ , 0.1 M in toluene) were combined in an oven-dried 4 mL (1 dram) vial equipped with an oven-dried stir bar. The vial was sealed and heated at 135  $^\circ\text{C}$  for 15 min. After cooling to 25  $^\circ\text{C}$ , a solution of substrate amine (442  $\mu\text{mol}$ , 442  $\mu\text{L}$ , 1.0 M in toluene) was added. The vial was re-sealed and heated at 135  $^\circ\text{C}$  for 24 h. It was then cooled to 25  $^\circ\text{C}$  and removed from the glovebox. The reaction mixture was transferred to a 20 mL scintillation vial. Triethylamine (134 mg, 184  $\mu\text{L}$ , 1.33 mmol) and 2-naphthoyl chloride (168 mg, 883  $\mu\text{mol}$ ) were added, and the resulting suspension was stirred for 2 h at 25  $^\circ\text{C}$ . The reaction mixture was filtered and washed with saturated  $\text{NaHCO}_3$  (2 x 3 mL). The organic layer was washed with brine (1 x 3 mL), dried over  $\text{MgSO}_4$ , filtered, and concentrated to provide a brown oil. The product was purified by flash chromatography to yield 115 mg (76%) of **20** as a yellow oil: IR (film)  $\text{cm}^{-1}$  3058, 2956, 2867, 1620, 1407;  $^1\text{H}$  NMR (400 MHz,  $\text{C}_6\text{D}_6$ )  $\delta$  8.12 (s, 1 H), 7.80 (d,  $J = 8$  Hz, 1 H), 7.32-7.64 (m, 3 H), 7.18-7.32 (m, 2 H), 4.74-4.76 (m, 1 H), 3.48 (d,  $J = 12$  Hz, 1 H), 3.01-3.06 (m, 1 H), 2.92 (d,  $J = 8$  Hz, 1 H), 2.79 (d,  $J = 8$  Hz), 1.35-1.42 (m, 2 H), 0.56

(s, 3H), 0.54 (s, 3 H);  $^{13}\text{C}$  NMR (126 MHz,  $\text{CD}_2\text{Cl}_2$ )  $\delta$  169.8, 138.6, 134.7, 133.9, 132.5, 129.8, 128.5, 128.1, 127.8, 127.6, 127.5, 127.3, 127.0, 126.5, 126.2, 124.7, 63.1, 57.9, 43.9, 39.0, 37.9, 25.2; HRMS (ESI $^+$ )  $m/z$  366.1841 [366.1834 calcd for  $\text{C}_{24}\text{H}_{25}\text{NO}$  ( $\text{M}+\text{Na}$ ) $^+$ ].

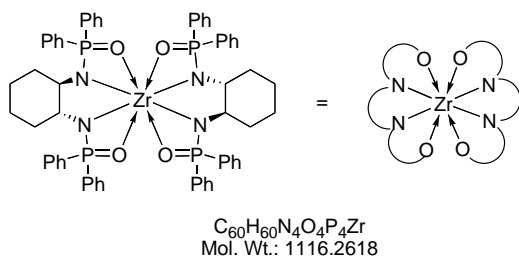

**Complex 21a.** In a glovebox, (*R,R*)-ligand **3c** (50 mg, 97  $\mu\text{mol}$ ),  $\text{Zr}(\text{NMe}_2)_4$  (26 mg, 97  $\mu\text{mol}$ ) and  $d_8$ -toluene (0.5 mL) were combined in a 4 mL vial equipped with a magnetic stirbar. The resulting suspension was stirred for 30 min, during which time the reaction mixture became homogenous.

The solution was transferred to a medium-walled NMR tube equipped with a teflon valve (J. Young tube). The tube was sealed and then removed from the glovebox. The tube was heated in an oil bath at 150  $^\circ\text{C}$  for 48 h and was occasionally removed to monitor reaction progress by NMR. Once intermediate **20a** was fully converted to **21a** (as judged by NMR), the tube was returned to the glovebox and opened. The solution was transferred to a 4 ml vial and layered with 1 ml of pentane, resulting in formation of microcrystalline **21a**. Decanting of the solvent provided 16 mg (30%) of **21a** as colorless prisms. Recrystallization from hot toluene provided X-ray quality crystals:  $^1\text{H}$  NMR (400 MHz,  $\text{C}_6\text{D}_6$ )  $\delta$  8.03 (ddd,  $J = 20.8, 12.2, 7.3$  Hz, 16 H), 7.26 (t,  $J = 7.3$  Hz, 4 H), 7.15 (td,  $J = 7.6, 2.2$  Hz, 8 H), 6.97-7.03 (m, 4 H), 6.9 (t,  $J = 7.8$  Hz, 8 H), 4.07 (d,  $J = 9.5$  Hz, 4 H), 1.79 (d,  $J = 11.0$  Hz, 4 H), 1.51-1.67 (m, 4 H), 1.35 (t,  $J = 8.6$  Hz, 4 H), 1.08 (t,  $J = 9.8$  Hz, 3 H);  $^{13}\text{C}$  NMR (126 MHz,  $\text{C}_6\text{D}_6$ , 2 resonances obscured)  $\delta$  137.1 (d,  $J = 117.3$  Hz), 135.2 (d,  $J = 99.8$  Hz), 133.0 (d,  $J = 10.8$  Hz), 132.4 (d,  $J = 10.8$  Hz), 130.3 (d,  $J = 1.9$  Hz), 130.0 (d,  $J = 2.4$  Hz), 65.5 (d,  $J = 16.0$  Hz), 35.3, 25.1;  $^{31}\text{P}$  NMR (162 MHz,  $\text{C}_6\text{D}_6$ )  $\delta$  34.3. Anal. Calcd for  $\text{C}_{60}\text{H}_{60}\text{N}_4\text{O}_4\text{P}_4\text{Zr}$ : C, 64.56; H, 5.42; N, 5.02. Found: C, 64.49; H, 5.22; N, 5.92.

Current Data Parameters  
 NAME 3185Cchar  
 EXPNO 1  
 PROCNO 1  
 DU /u  
 USER DAW

F2 - Acquisition Parameters  
 Date\_ 20060703  
 Time\_ 18.49  
 INSTRUM AVQ-400  
 PROBHD 5 mm QNP 1H/13  
 PULPROG zgpg30  
 TD 65536  
 SOLVENT CDCl3  
 NS 557  
 DS 0  
 SWH 24038.461 Hz  
 FIDRES 0.366798 Hz  
 AQ 1.3632196 sec  
 RG 16384  
 DW 20.800 usec  
 DE 6.00 usec  
 TE 292.6 K  
 D1 2.0000000 sec  
 d11 0.0300000 sec  
 DELTA 1.8999998 sec  
 MCREST 0.0000000 sec  
 MCSRK 0.0150000 sec

==== CHANNEL f1 =====  
 NUC1 13C  
 P1 8.50 usec  
 PL1 -2.00 dB  
 SFO1 100.6228298 MHz

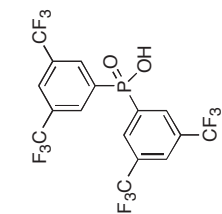

139.19  
 137.84  
 132.28  
 131.15  
 131.02  
 130.82  
 130.69  
 125.99  
 124.70  
 121.98

AVQ-400 QNP Carbon Starting parameters 7/16/03 revised 7

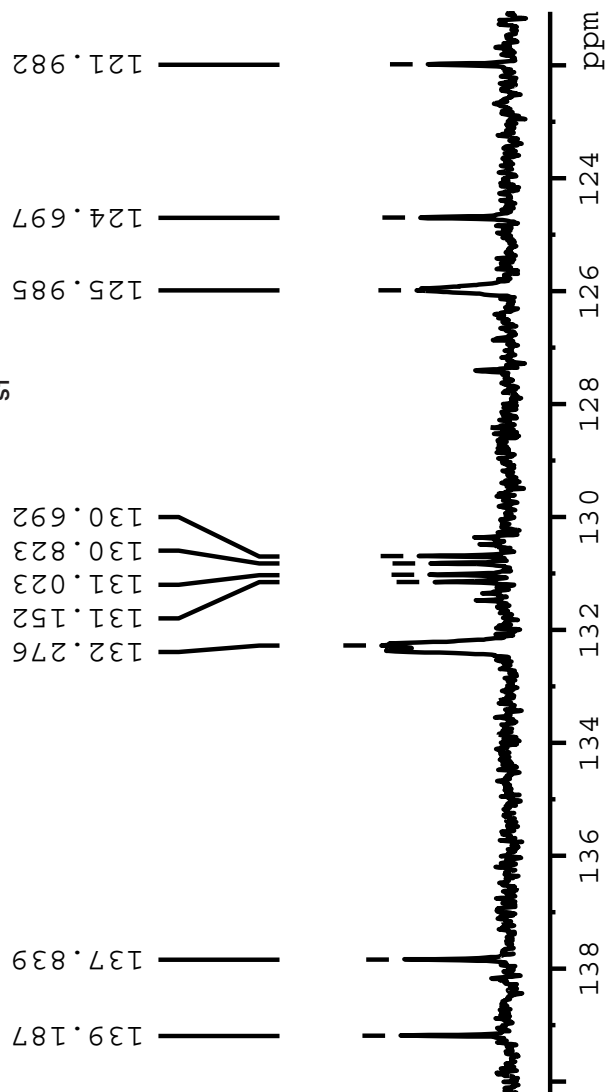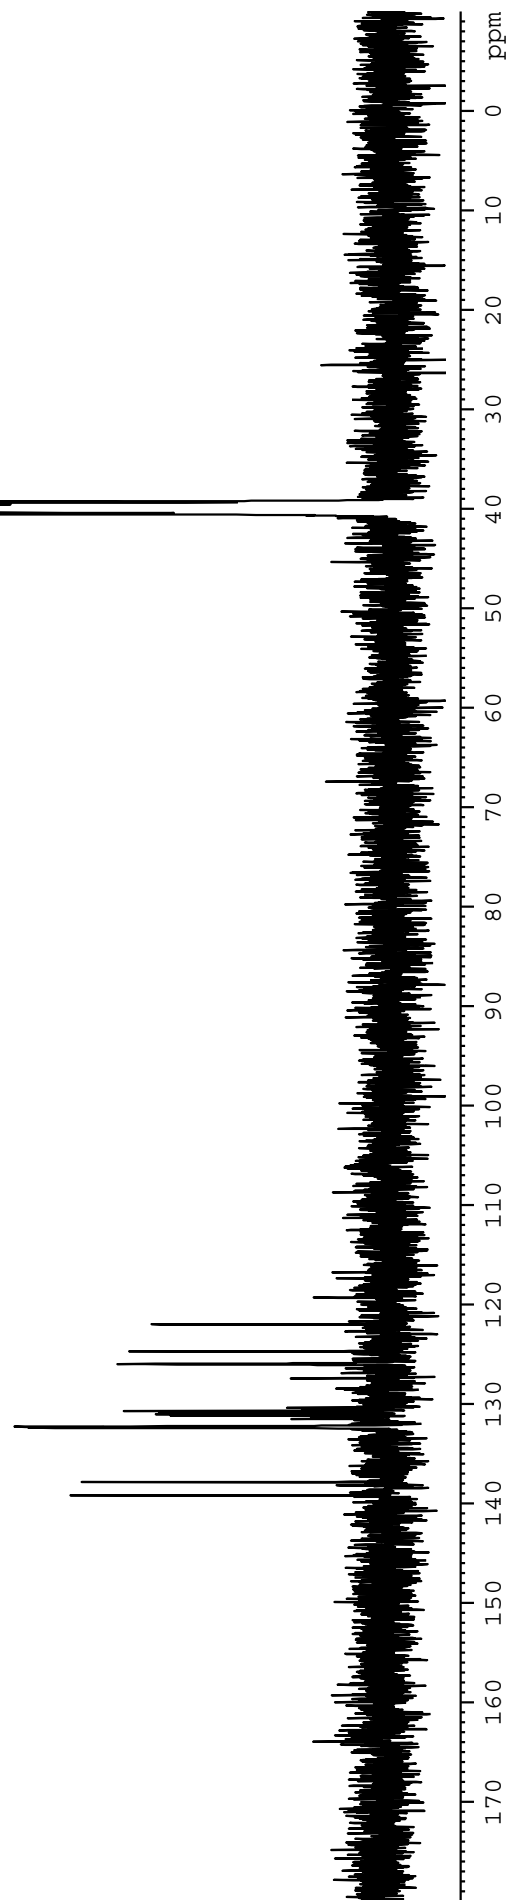

Supporting Information - Watson, Chiu and Bergman

```

Current Data Parameters
NAME      3185Hchar
EXPNO    1
PROCNO   1

F2 - Acquisition Parameters
Date_    20060703
Time     18.45
INSTRUM  AVQ-400
PROBHD   5 mm QNP 1H/13
PULPROG  zg30
TD        65536
SOLVENT  DMSO
NS        1
DS        0
SWH       8012.820 Hz
FIDRES    0.122266 Hz
AQ         4.0894966 sec
RG         322.5
DE         62.400 use
TE         6.00 use
TE         292.6 K
D1         1.0000000 sec
MCREST    0.0000000 sec
MCWRK     0.0150000 sec

===== CHANNEL f1 =====
NUC1      1H
P1        12.80 use
PL1       0.00 dB
SFO1      400.1324700 MHz

F2 - Processing parameters
SI         65536
SF         400.1300142 MHz
WDW        EM
SSB        0
LR         0.30 Hz
    
```

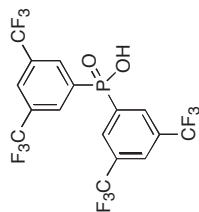

C<sub>16</sub>H<sub>7</sub>F<sub>12</sub>O<sub>2</sub>P  
Mol. Wt.: 490.18  
S1

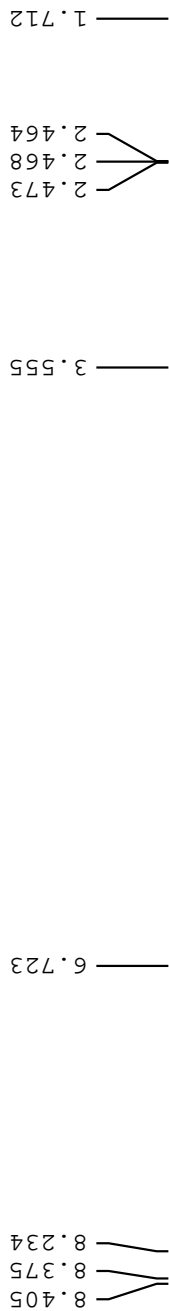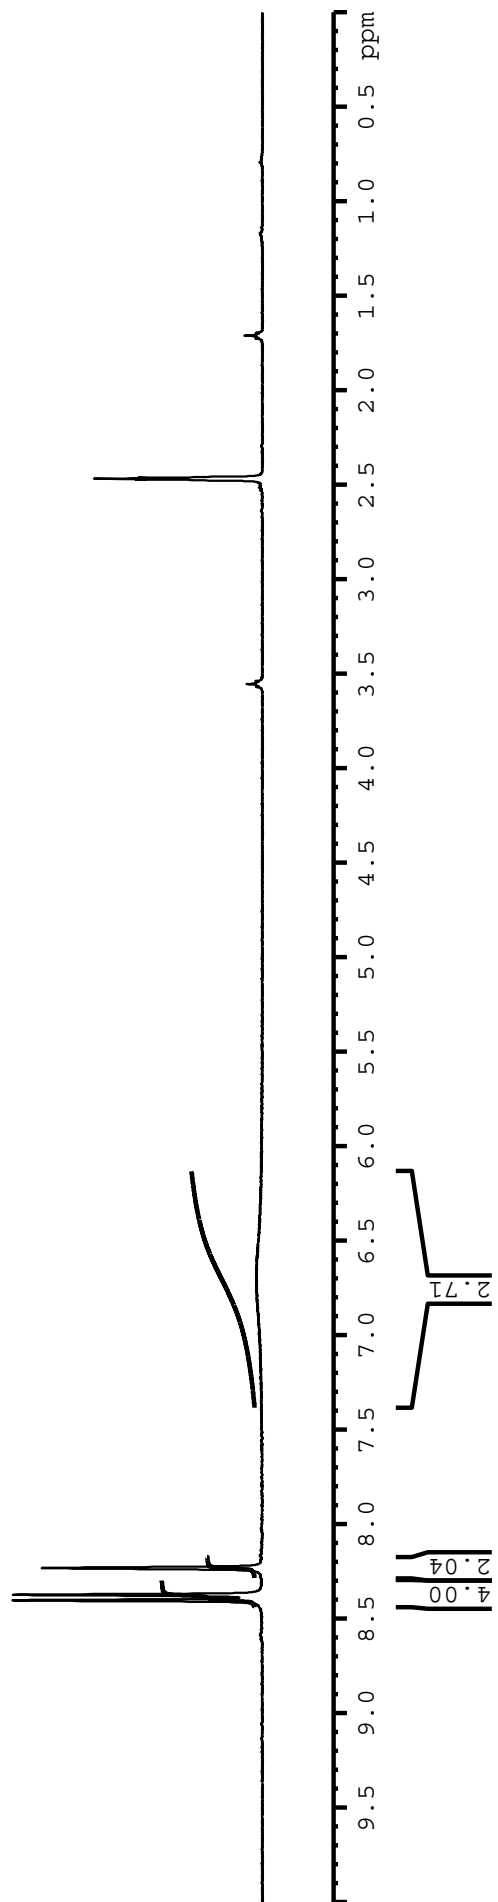



```

Current Data Parameters
NAME      3194aCchar
EXPNO    1
PROCNO   1

F2 - Acquisition Parameters
Date_    20060704
Time     9.38
INSTRUM  AVB-400
PROBHD   5 mm PABBO BB-
PULPROG  zgpg30
TD       65536
SOLVENT  CDCl3
NS       629
DS       0
SWH      23980.814 Hz
FIDRES   0.365918 Hz
AQ       1.3664756 sec
RG       16384
DE       20.850 usec
TE       294.2 K
D1       1.5000000 sec
d11      0.0300000 sec
DELTA    1.39999998 sec
MCREST   0.0000000 sec
MCWRK    0.01500000 sec

===== CHANNEL f1 =====
NUC1     13C
P1       8.50 usec
PL1      -2.00 dB
SFO1     100.6228298 MHz

===== CHANNEL f2 =====
  
```

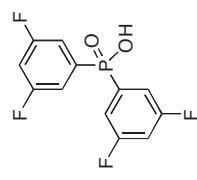

114.82  
 114.72  
 114.64  
 114.56  
 114.46  
 108.18  
 107.93  
 107.66

AVB-400 Z80 Carbon Starting parameters 6/11/03 RN

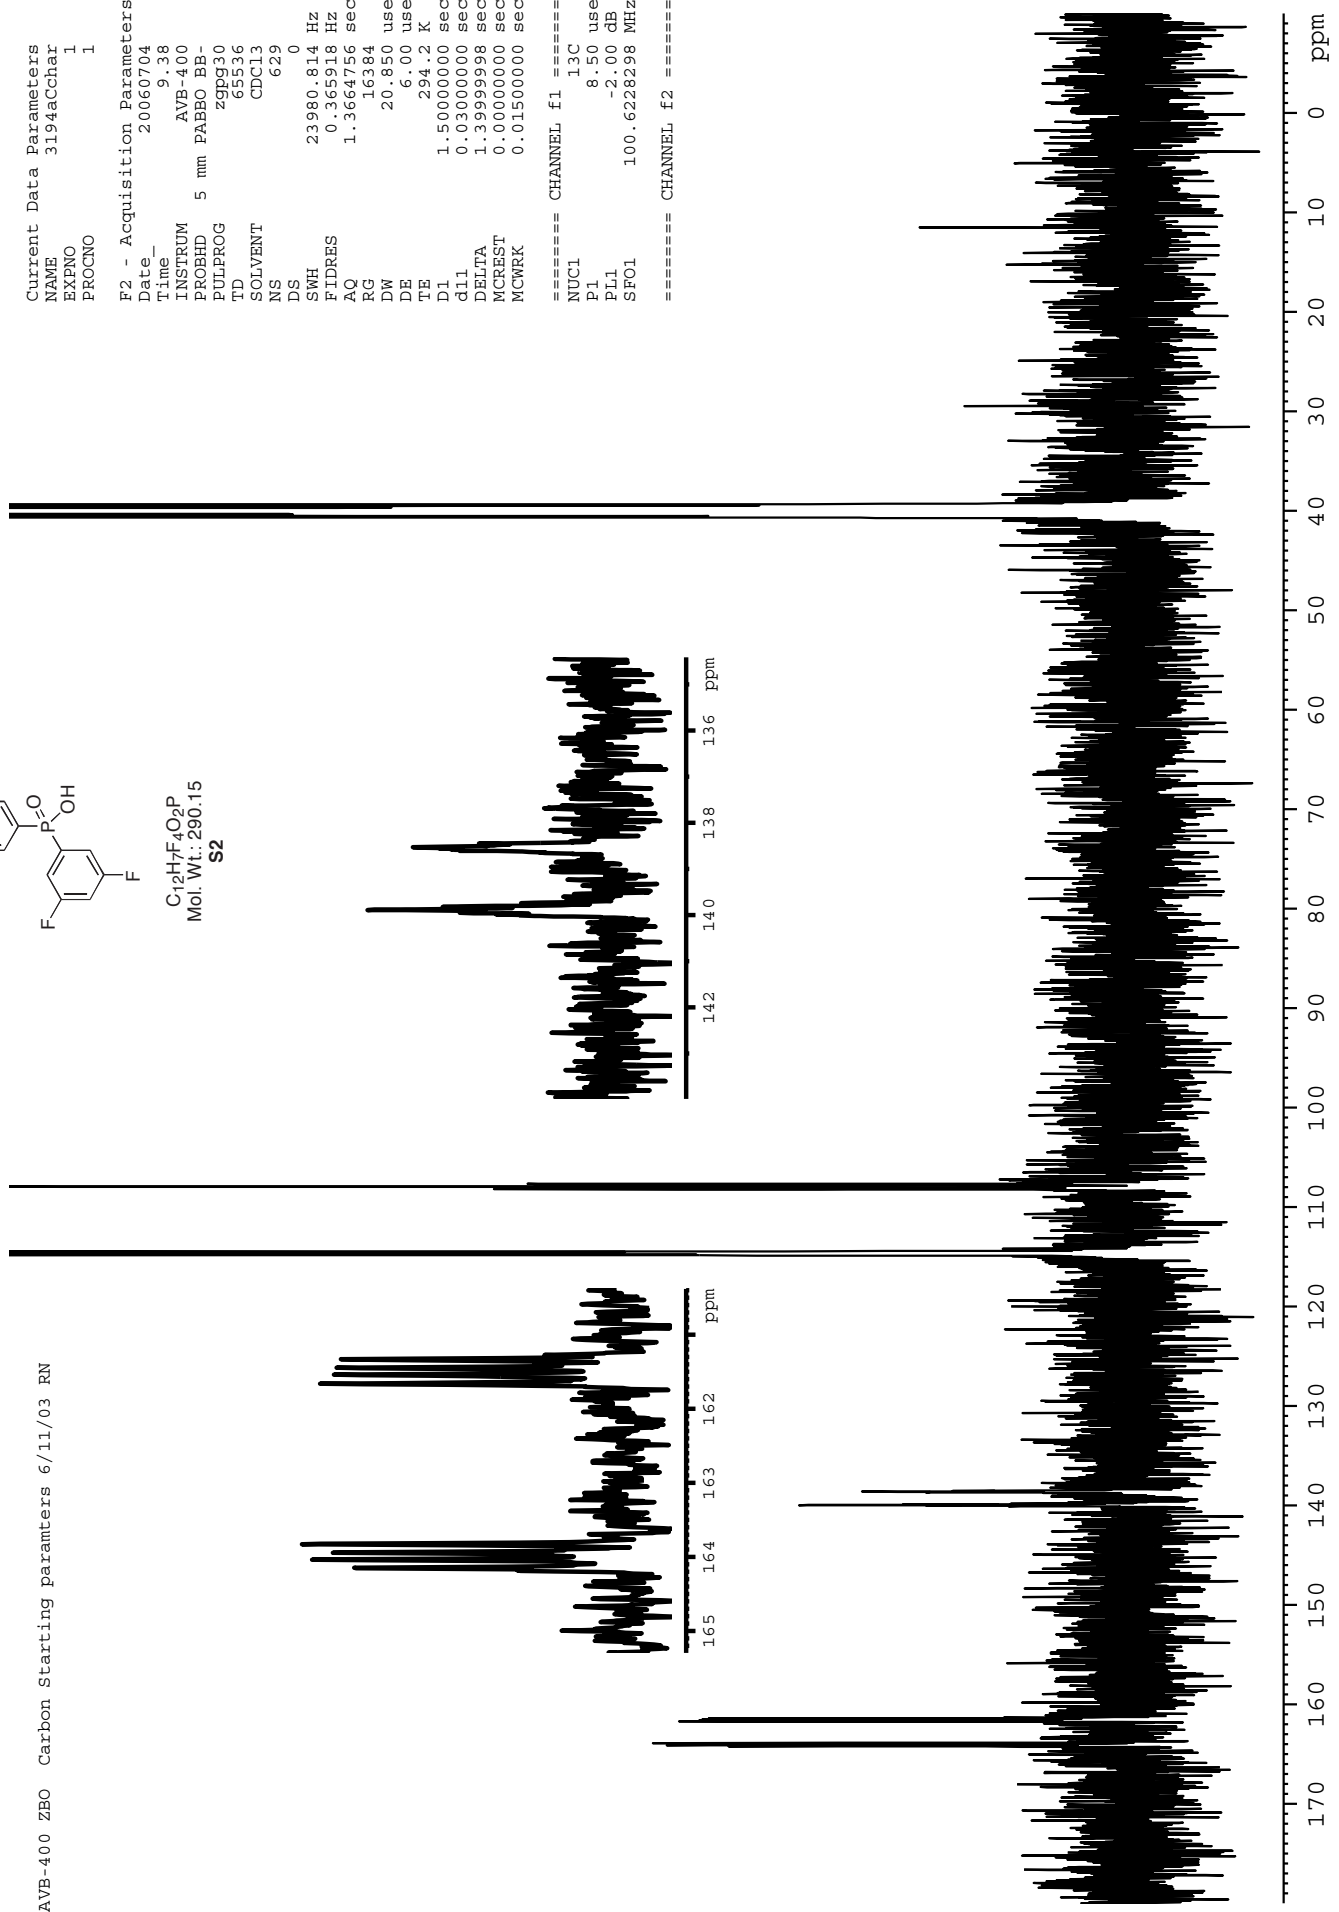

Supporting Information - Watson, Chiu and Bergman

1.768  
1.750  
1.521  
1.191  
1.180  
1.161  
1.143  
1.000

Current Data Parameters  
 NAME 3194ahchar  
 EXPNO 1  
 PROCNO 1  
 DU /u  
 USER DAW

F2 - Acquisition Parameters  
 Date\_ 20060704  
 Time 9.34  
 INSTRUM AVB-400  
 PROBHD 5 mm PABBO BB-  
 PULPROG zg30  
 TD 65536  
 SOLVENT CDCl3  
 NS 1  
 DS 0  
 SWH 8278.146 Hz  
 FIDRES 0.126314 Hz  
 AQ 3.9584243 sec  
 RG 203.2  
 DW 60.400 usec  
 DE 6.00 usec  
 TE 294.1 K  
 DI 1.0000000 sec  
 MCREST 0.0000000 sec  
 MCWRK 0.01500000 sec

==== CHANNEL f1 =====  
 NUC1 1H  
 P1 8.20 usec  
 PL1 -3.00 dB  
 SFO1 400.1324710 MHz

F2 - Processing parameters  
 SI 32768  
 SF 400.1300000 MHz  
 WTMW RM

2.511  
2.507  
2.920

3.657  
3.640  
3.623  
3.431  
3.415  
3.399

5.759

7.480  
7.463  
7.449  
7.444  
7.436

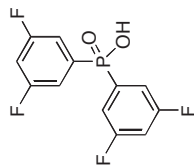

C<sub>12</sub>H<sub>7</sub>F<sub>4</sub>O<sub>2</sub>P  
 Mol. Wt.: 290.15  
**S2**

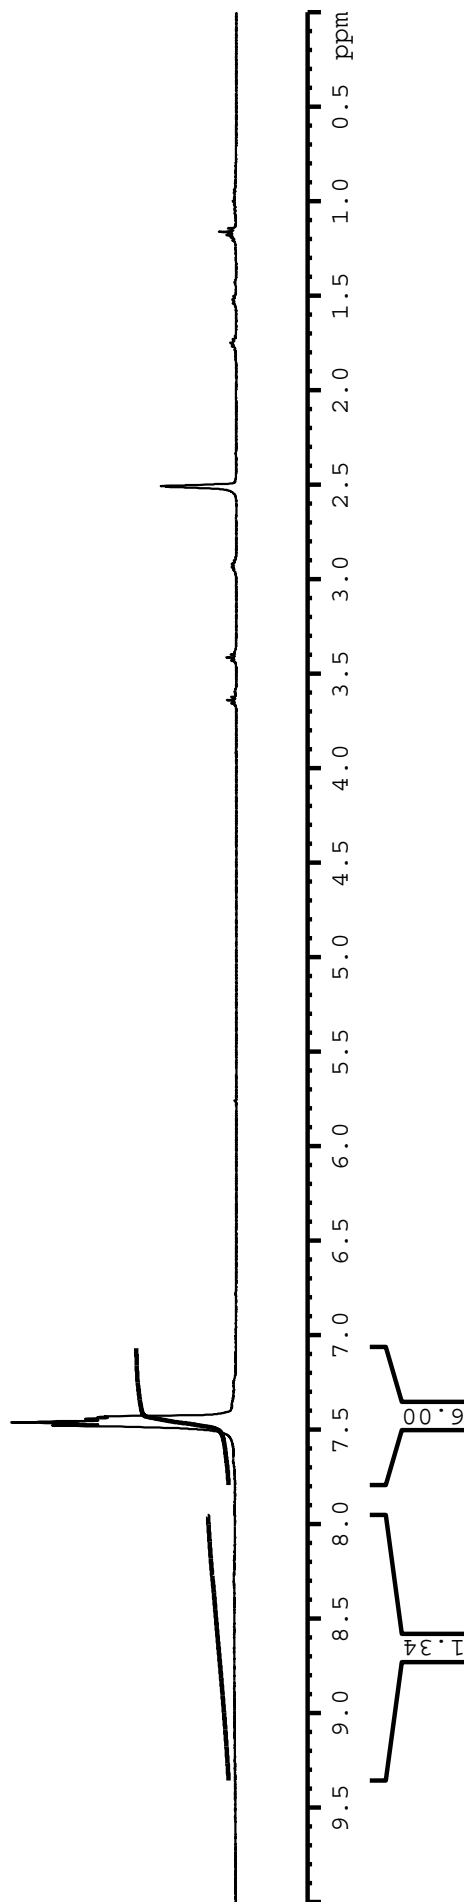

```

Current Data Parameters
NAME      4111Cchar
EXPNO    2
PROCNO   1

F2 - Acquisition Parameters
Date_    20060703
Time     19.23
INSTRUM  AVO-400
PROBHD   5 mm QNP 1H/13
PULPROG  zgpg30
TD        65536
SOLVENT  CDCl3
NS        36
DS        0
SWH       24038.461 Hz
FIDRES    0.366798 Hz
AQ        1.3631988 sec
RG        16384
DE        20.800 usec
TE        292.6 K
D1        2.0000000 sec
d11       0.03000000 sec
DELTA     1.89999998 sec
MCREST    0.0000000 sec
MCWRK     0.01500000 sec

===== CHANNEL f1 =====
NUC1      13C
P1        8.50 usec
PL1       -2.00 dB
SFO1      100.6228298 MHz

===== CHANNEL f2 =====
    
```

160.88  
160.69  
137.93  
136.60  
108.95  
108.85  
103.43

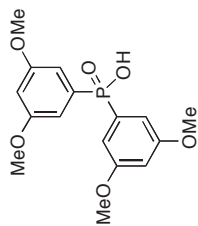

C<sub>16</sub>H<sub>19</sub>O<sub>6</sub>P  
Mol. Wt.: 338.29  
**S3**

AVQ-400 QNP Carbon Starting parameters 7/16/03 revised 7

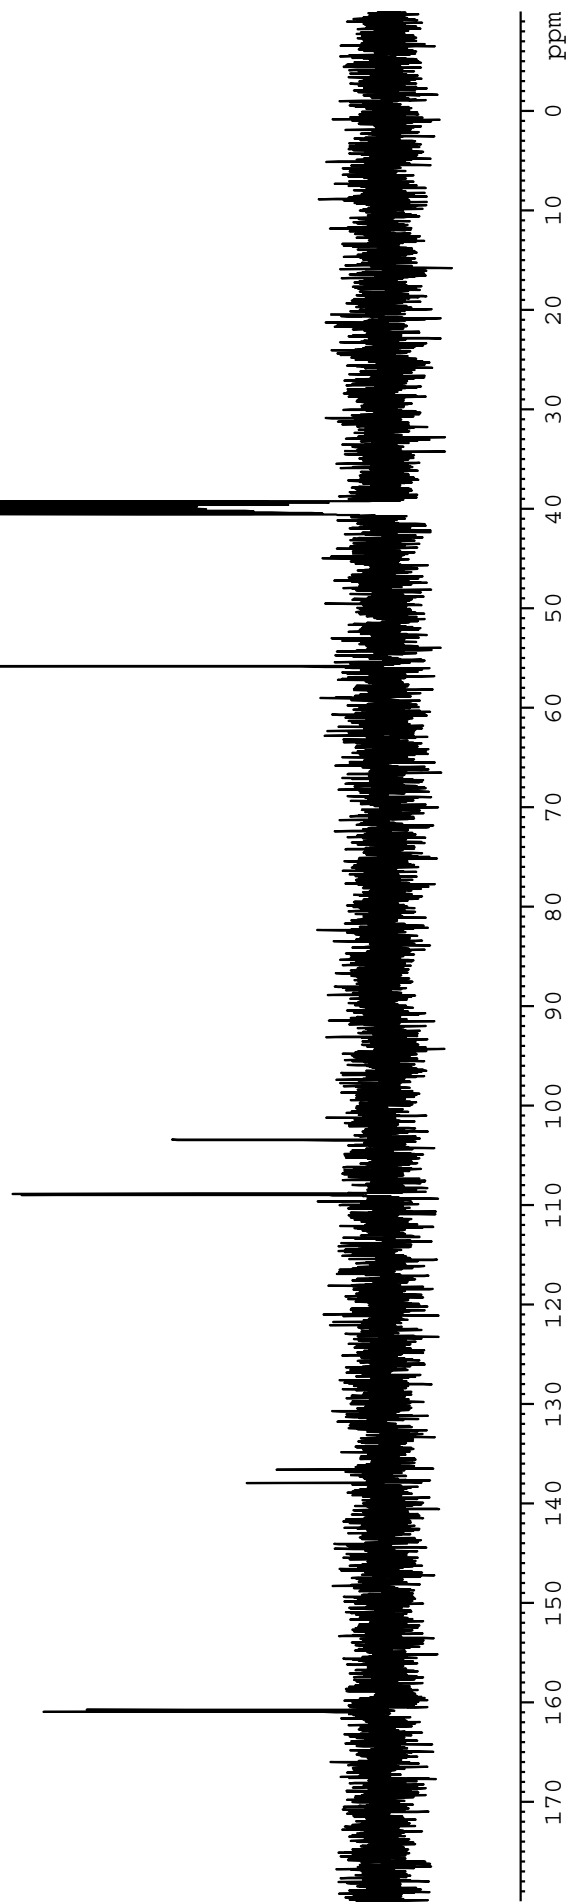

Supporting Information - Watson, Chiu and Bergman

```

Current Data Parameters
NAME      4111Hchar
EXPNO    2
PROCNO   1
DU       /u
USER     DAW

F2 - Acquisition Parameters
Date_    20060703
Time     19.26
INSTRUM  AVO-400
PROBHD   5 mm QNP 1H/13
PULPROG  zg30
TD        65536
SOLVENT  CDCl3
NS        1
DS        0
SWH       8012.820 Hz
FIDRES    0.122266 Hz
AQ        4.0895586 sec
RG        203.2
DE        62.400 use
TE        292.5 K
DI        1.0000000 sec
MCREST    0.0000000 sec
MCWRK    0.01500000 sec

===== CHANNEL f1 =====
NUC1      1H
P1        12.80 use
PL1       0.00 dB
SFO1      400.1324700 MHz

F2 - Processing parameters
SI        65536
SF        400.1300142 MHz
WDW       RM
    
```

2.464  
2.468  
2.473  
2.879  
2.895  
3.536  
3.719  
3.898  
4.576

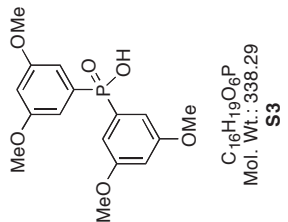

6.799  
6.793  
6.766  
6.760  
6.614  
6.609  
6.603

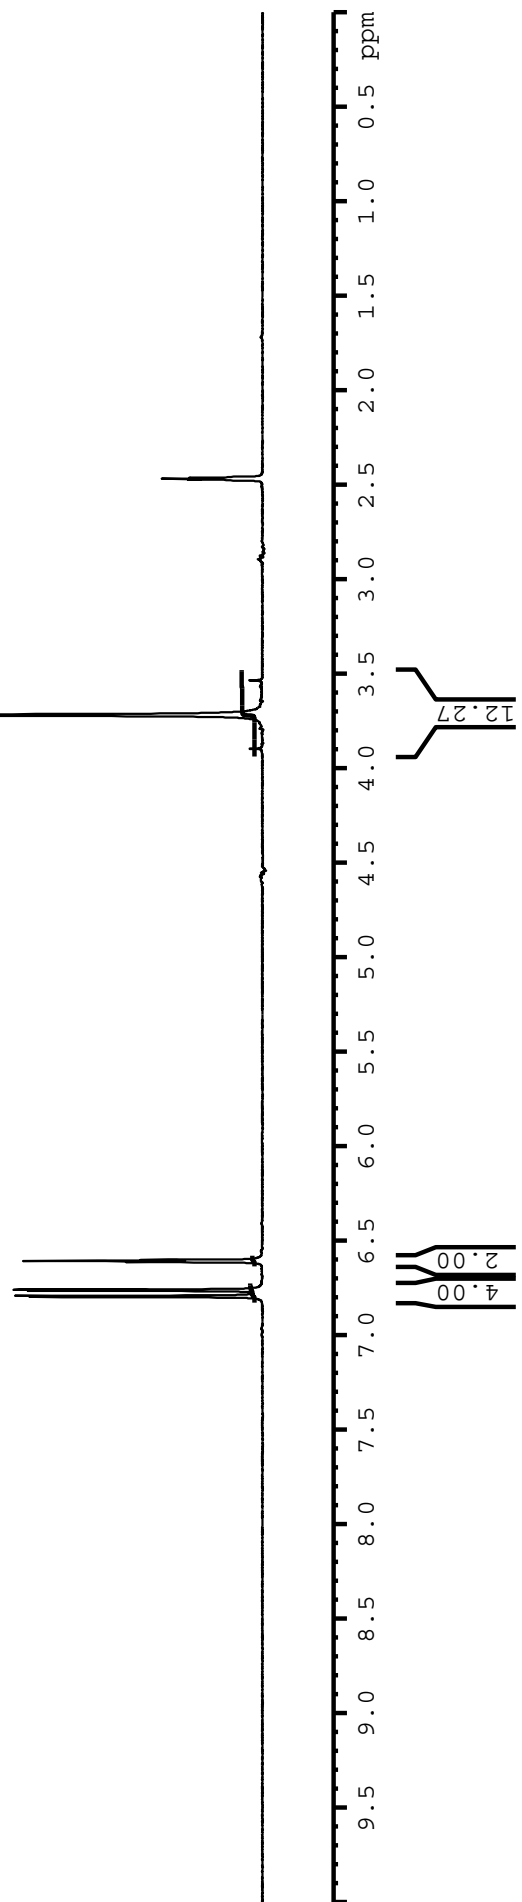

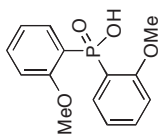

C<sub>14</sub>H<sub>15</sub>O<sub>4</sub>P  
 Mol. Wt.: 278.24  
**S4**

Supporting Information - Watson, Chiu and Bergman

S21

```

Current Data Parameters
NAME      4110Cchar
EXPNO     1
PROCNO    1

F2 - Acquisition Parameters
Date_     20060703
Time      19.32
INSTRUM   AVQ-400
PROBHD    5 mm QNP 1H/13
PULPROG   zgpg30
TD         65536
SOLVENT   CDCl3
NS         266
DS         0
SWH        24038.461 Hz
FIDRES     0.366798 Hz
AQ         1.3631988 sec
RG         16384
DW         20.800 usec
DE         6.00 usec
TE         292.5 K
D1         2.0000000 sec
d11        0.03000000 sec
DELTA     1.89999998 sec
MCREST    0.0000000 sec
MCWRK     0.01500000 sec

===== CHANNEL f1 =====
NUC1       13C
P1         8.50 usec
PL1        -2.00 dB
SFO1       100.6228298 MHz

===== CHANNEL f2 =====
    
```

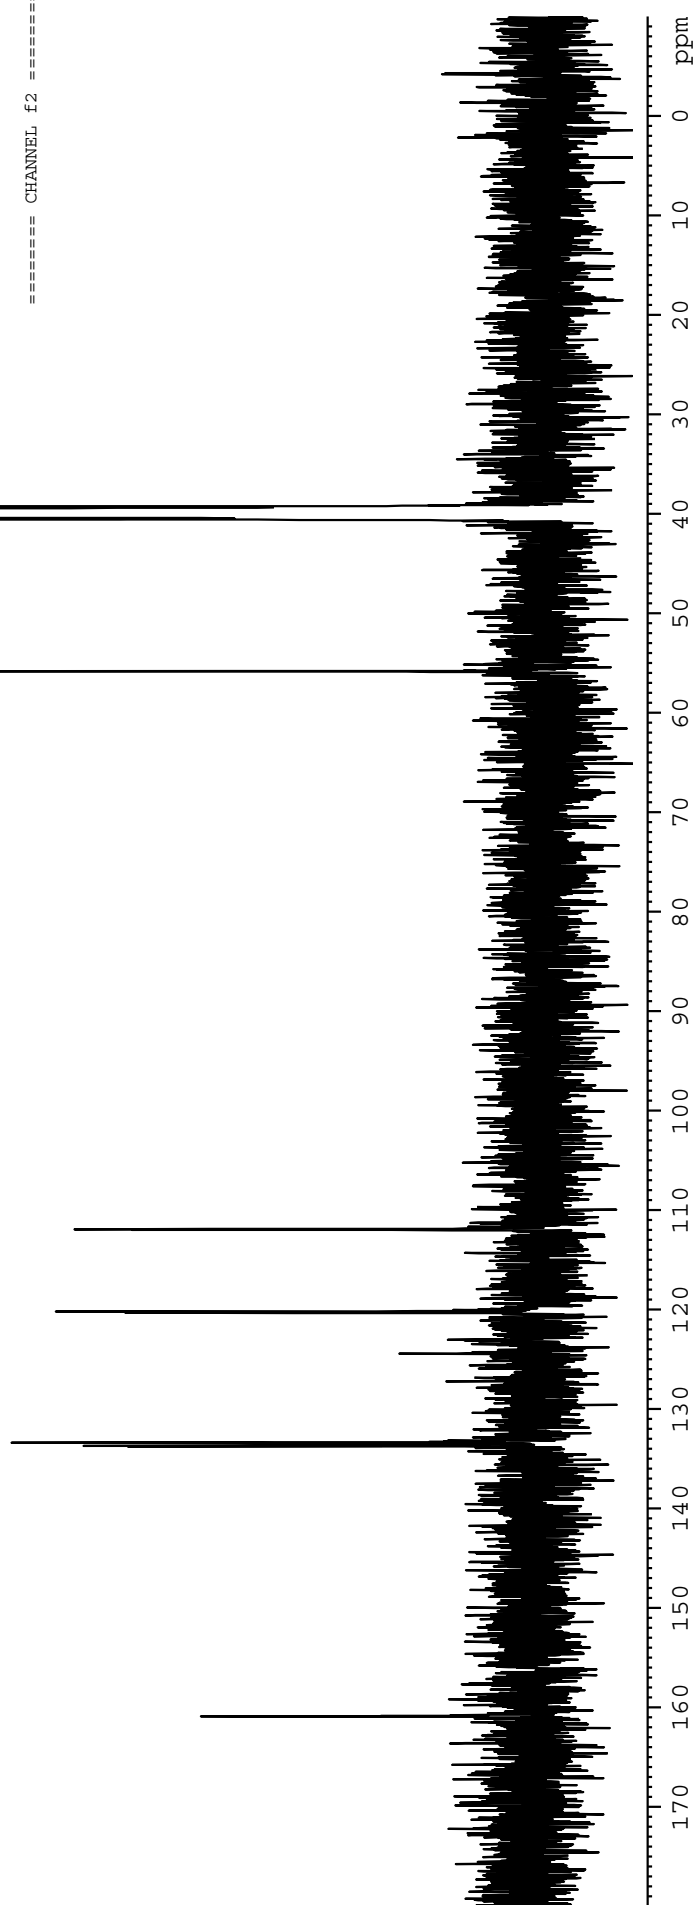

Supporting Information - Watson, Chiu and Bergman

```

Current Data Parameters
NAME      4110Hchar
EXPNO    1
PROCNO   1
DU       /u
USER     DAW

F2 - Acquisition Parameters
Date_    20060703
Time     19.29
INSTRUM  AVO-400
PROBHD   5 mm QNP 1H/13
PULPROG  zg30
TD        65536
SOLVENT  CDCl3
NS        1
DS        0
SWH       8012.820 Hz
FIDRES    0.122266 Hz
AQ        4.0895586 sec
RG        181
DE        62.400 usec
TE        292.5 K
DI        1.0000000 sec
MCREST    0.0000000 sec
MCWRK    0.01500000 sec

===== CHANNEL f1 =====
NUC1      1H
P1        12.60 usec
PL1       0.00 dB
SFO1      400.1324700 MHz

F2 - Processing parameters
SI         65536
SF         400.1300142 MHz
WDW        RM
    
```

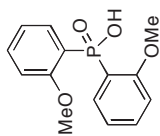

C<sub>14</sub>H<sub>15</sub>O<sub>4</sub>P  
Mol. Wt.: 278.24  
**S4**

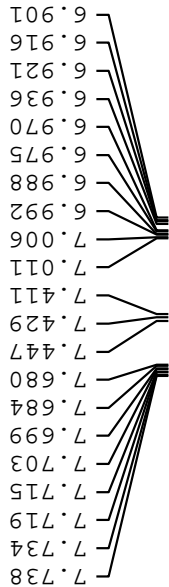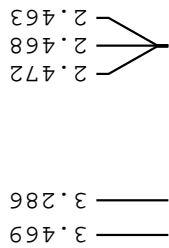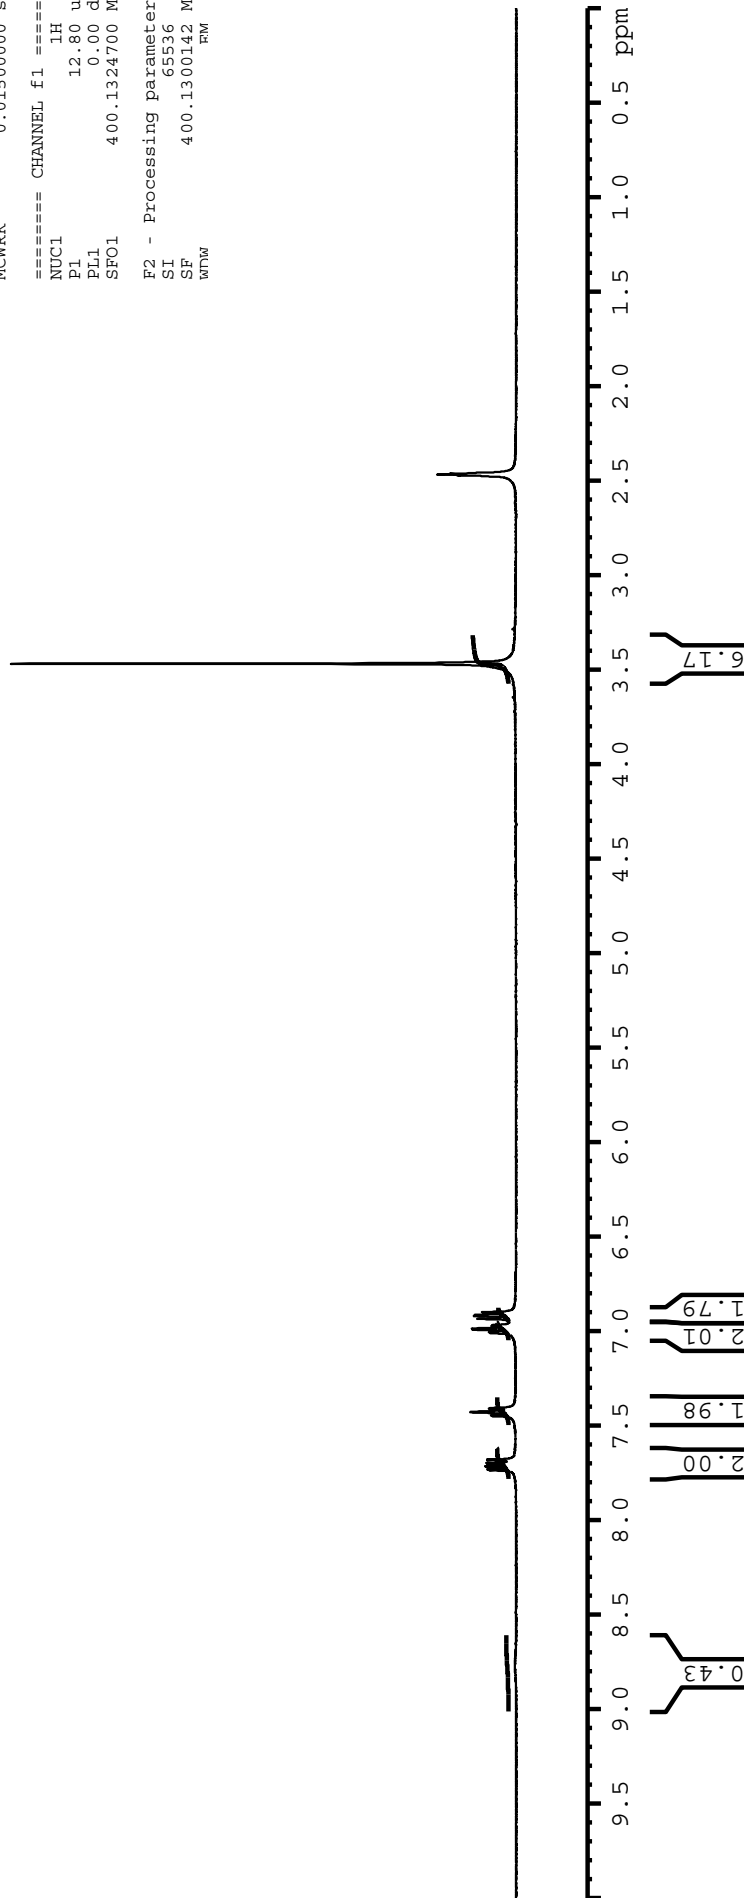

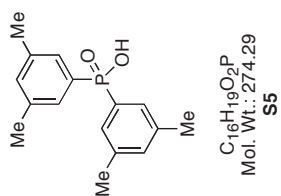

AVQ-400 QNP Carbon Starting parameters 7/16/03 revised 7

138.12  
 137.99  
 133.46  
 133.43  
 133.31  
 133.31  
 131.94  
 128.49  
 128.39

Current Data Parameters  
 NAME 4080Cchar  
 EXPNO 1  
 PROCNO 1  
 F2 - Acquisition Parameters  
 Date\_ 20060703  
 Time 18.01  
 INSTRUM AVQ-400  
 PROBD 5 mm QNP 1H/13  
 PULPROG zgpg30  
 TD 65536  
 SOLVENT CDCl3  
 NS 42  
 DS 0  
 SWH 24038.461 Hz  
 FIDRES 0.366798 Hz  
 AQ 1.3631988 sec  
 RG 16384  
 DW 20.800 usec  
 DE 6.00 usec  
 TE 292.6 K  
 D1 2.0000000 sec  
 d11 0.03000000 sec  
 DELTA 1.89999998 sec  
 MCREST 0.0000000 sec  
 MCWRK 0.01500000 sec  
 ===== CHANNEL f1 =====  
 NUC1 13C  
 P1 8.50 usec  
 PL1 -2.00 dB  
 SFO1 100.6228298 MHz  
 ===== CHANNEL f2 =====

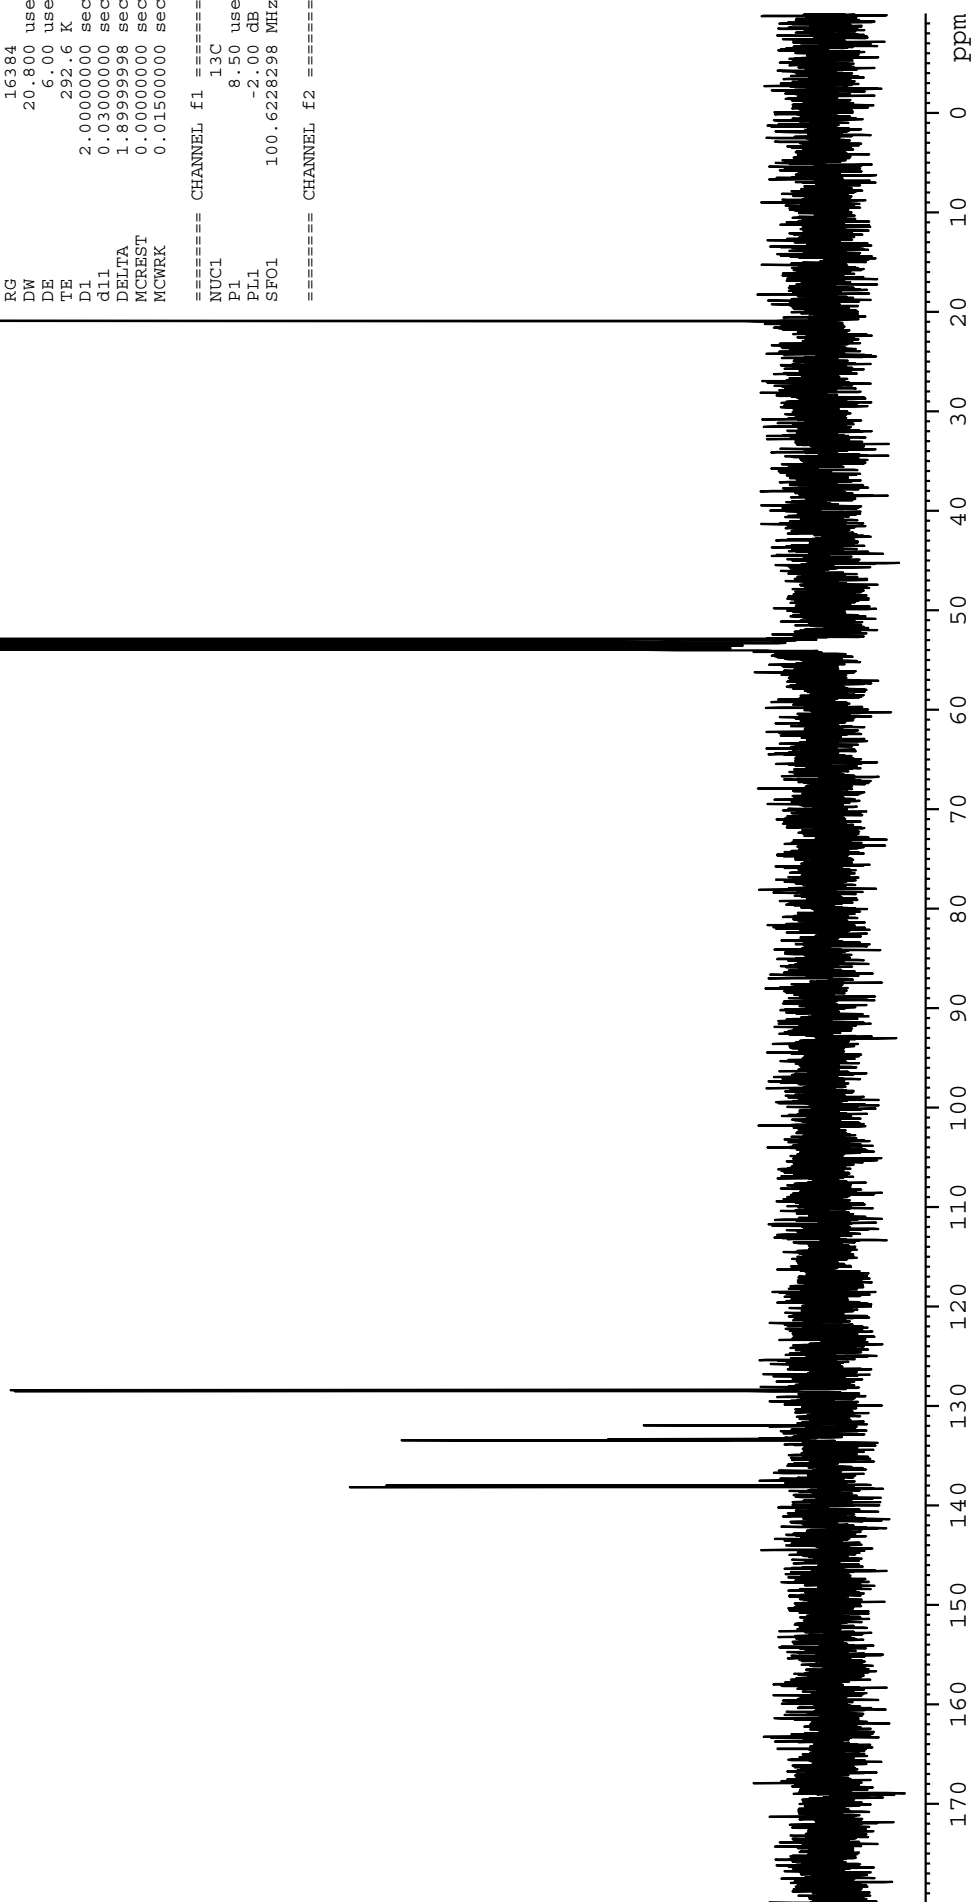

Supporting Information - Watson, Chiu and Bergman

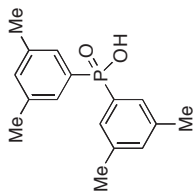

C<sub>11</sub>H<sub>14</sub>O<sub>2</sub>P  
Mol. Wt.: 274.29  
**S5**

Current Data Parameters  
NAME 4080Hchar  
EXPNO 1  
PROCNO 1  
DU /u  
USER DAW

F2 - Acquisition Parameters  
Date\_ 20060703  
Time 17.58  
INSTRUM AVO-400  
PROBHD 5 mm QNP 1H/13  
PULPROG zg30  
TD 65536  
SOLVENT CDC13  
NS 1  
DS 0  
SWH 8012.820 Hz  
FIDRES 0.122266 Hz  
AQ 4.0895586 sec  
RG 181  
DE 62.400 use  
TE 292.5 K  
DI 1.0000000 sec  
MCREST 0.0000000 sec  
MCWRK 0.01500000 sec

==== CHANNEL f1 =====  
NUC1 1H  
P1 12.80 use  
PL1 0.00 dB  
SFO1 400.1324700 MHz

F2 - Processing parameters  
SI 65536  
SF 400.1300142 MHz  
WUM

5.334  
5.324  
5.322  
5.319

7.334  
7.302  
7.102

12.638

2.430  
2.305  
2.273  
2.213  
2.113

1.448  
1.272  
0.889  
0.806  
0.779

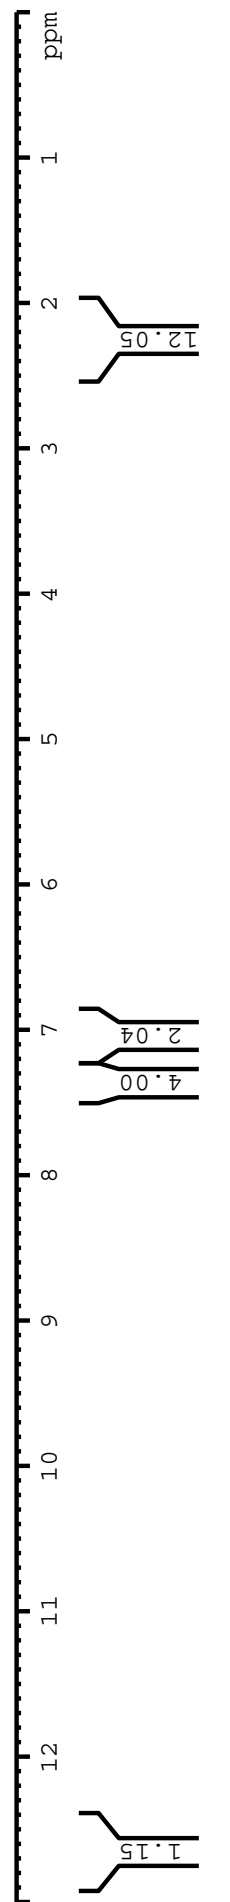



```

Current Data Parameters
NAME      4006aCchar
EXPNO     1
PROCNO    1

F2 - Acquisition Parameters
Date_     20060704
Time      10.14
INSTRUM   AVB-400
PROBHD    5 mm PABBO BB-
PULPROG   zgpg30
TD         65536
SOLVENT   CD2Cl2
NS         202
DS         0
SWH        23980.814 Hz
FIDRES     0.365918 Hz
AQ         1.3664756 sec
RG         16384
DW         20.850 usec
DE         6.00 usec
TE         294.7 K
D1         1.5000000 sec
d11        0.0300000 sec
DELTA     1.39999998 sec
MCREST    0.0000000 sec
MCWRK     0.01500000 sec

===== CHANNEL f1 =====
NUC1       13C
P1         8.50 usec
PL1        -2.00 dB
SFO1       100.6228298 MHz

===== CHANNEL f2 =====
    
```

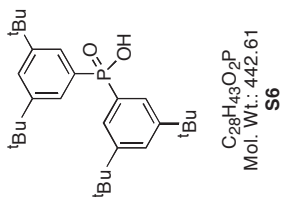

126.25  
 125.19  
 125.08  
 122.70

AVB-400 ZBO Carbon Starting paramters 6/11/03 RN

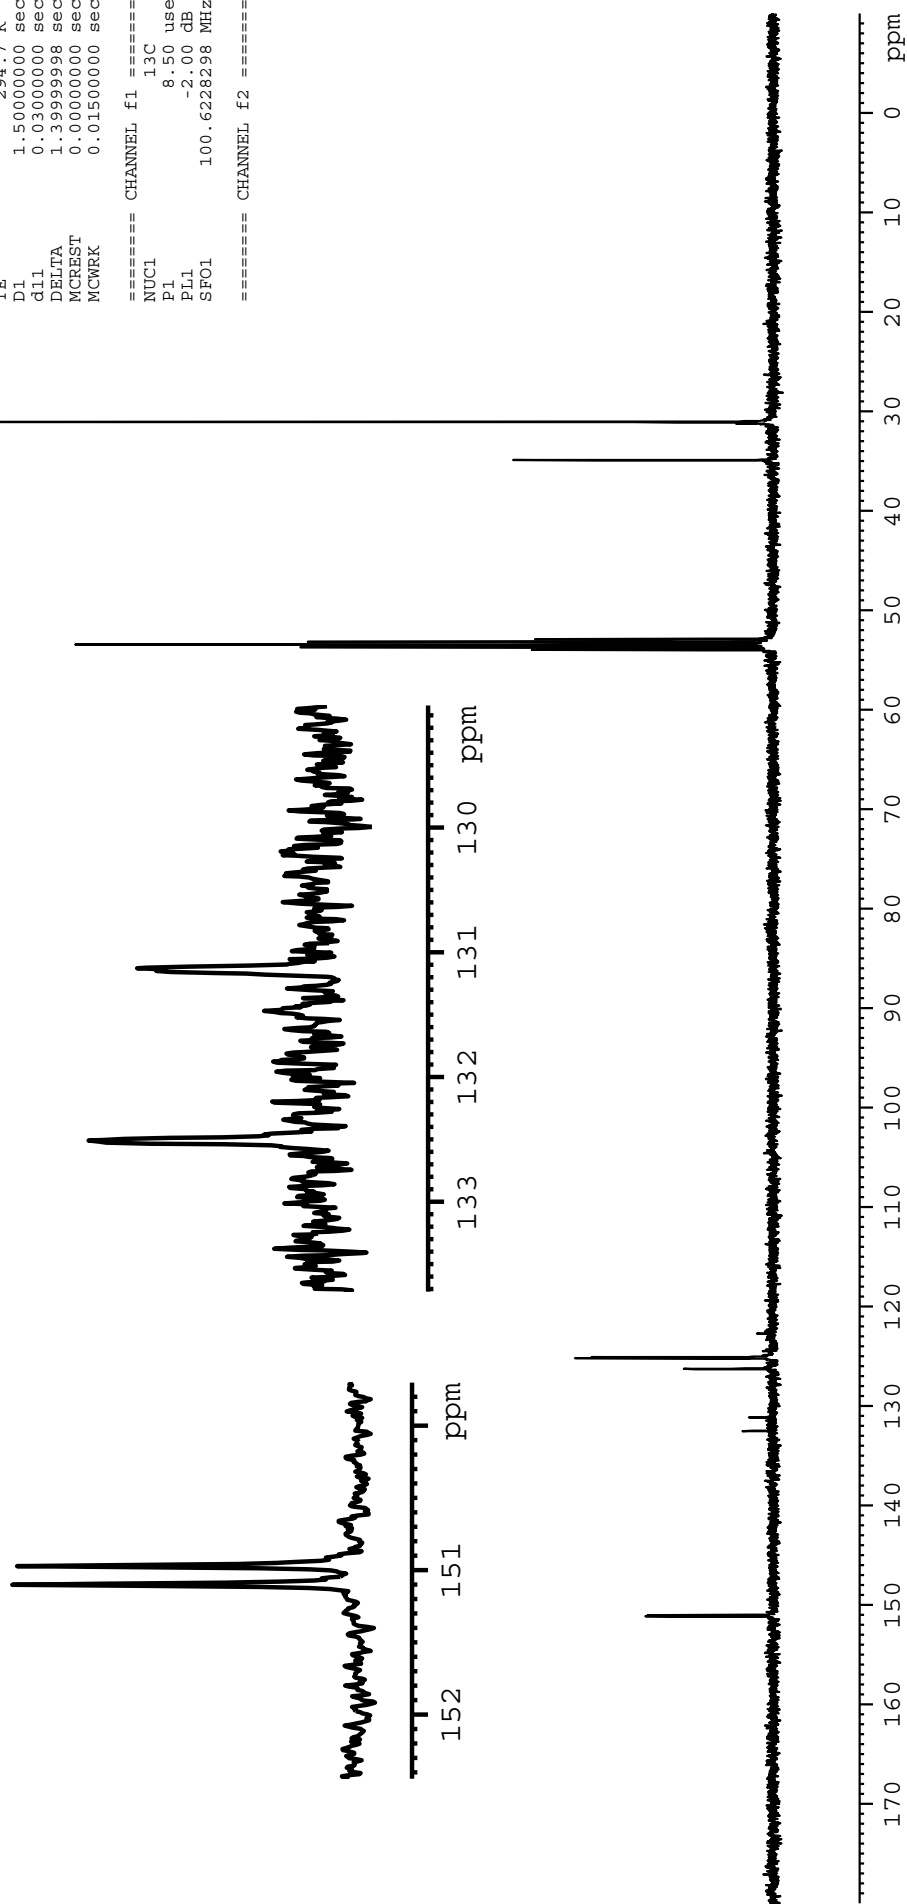

Supporting Information - Watson, Chiu and Bergman

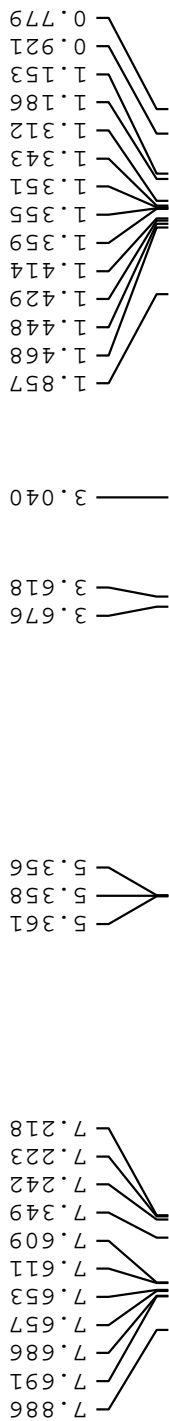

Current Data Parameters  
 USER DAW  
 NAME 4106ahChar  
 EXPNO 1  
 PROCNO 1

F2 - Acquisition Parameters  
 Date\_ 20060704  
 Time 9.27  
 INSTRUM AVB-400  
 PROBD 5 mm PABBO BB-  
 PULPROG zg30  
 TD 65536  
 SOLVENT CDCl3  
 NS 1  
 DS 0  
 SWH 8278.146 Hz  
 FIDRES 0.126314 Hz  
 AQ 3.9584243 sec  
 RG 181  
 DW 60.400 use  
 DE 6.00 use  
 TE 294.1 K  
 D1 1.0000000 sec  
 MCREST 0.0000000 sec  
 MCWRK 0.01500000 seq

==== CHANNEL f1 =====  
 NUC1 1H  
 P1 8.20 use  
 PL1 -3.00 dB  
 SFO1 400.1324710 MHz  
 F2 - Processing parameters  
 SI 32768  
 SF 400.1300000 MHz  
 WDW EM  
 SSR 0

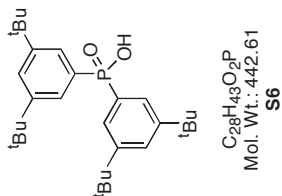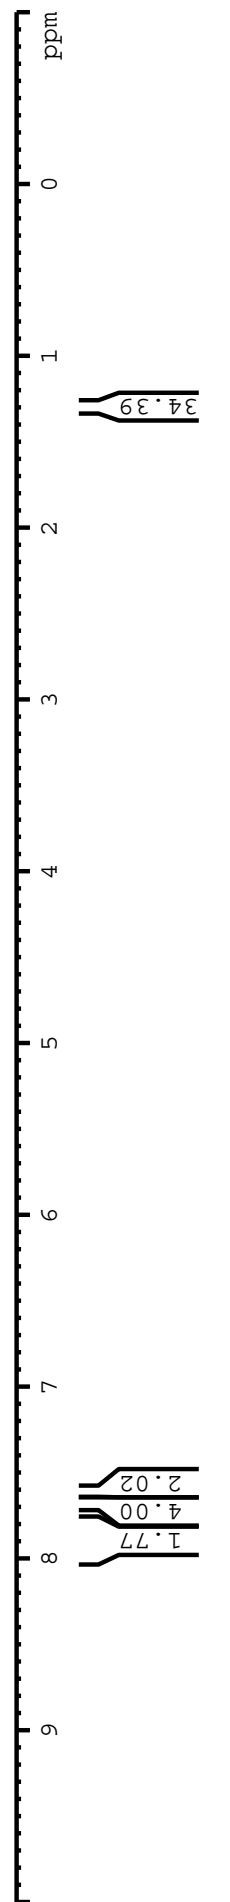

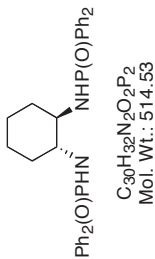

**3c**

2.158  
 2.089  
 2.056  
 1.591  
 1.572  
 1.453  
 1.334  
 1.308  
 1.168  
 1.139  
 1.115  
 1.091  
 1.015  
 0.998  
 0.941  
 0.925  
 0.907

Current Data Parameters  
 NAME 3087AH  
 EXPNO 1  
 PROCNO 1  
 F2 - Acquisition Parameters  
 Date\_ 20060606  
 Time 19.24  
 INSTRUM AVB-400  
 PROBHD 5 mm PABBO BB-  
 PULPROG zg30  
 TD 65536  
 SOLVENT CDCl3  
 NS 1  
 DS 0  
 SWH 8278.146 Hz  
 FIDRES 0.126314 Hz  
 AQ 3.9584243 sec  
 RG 181  
 DW 60.400 use  
 DE 6.00 use  
 TE 295.6 K  
 D1 1.0000000 sec  
 MCREST 0.0000000 sec  
 MCWRK 0.01500000 sec  
 ===== CHANNEL f1 =====  
 NUC1 1H  
 P1 8.20 use  
 PL1 -3.00 dB  
 SFO1 400.1324710 MHz  
 F2 - Processing parameters  
 SI 32768  
 SF 400.1300000 MHz  
 WDW EM  
 SSB 0  
 T.R 0.00 Hz

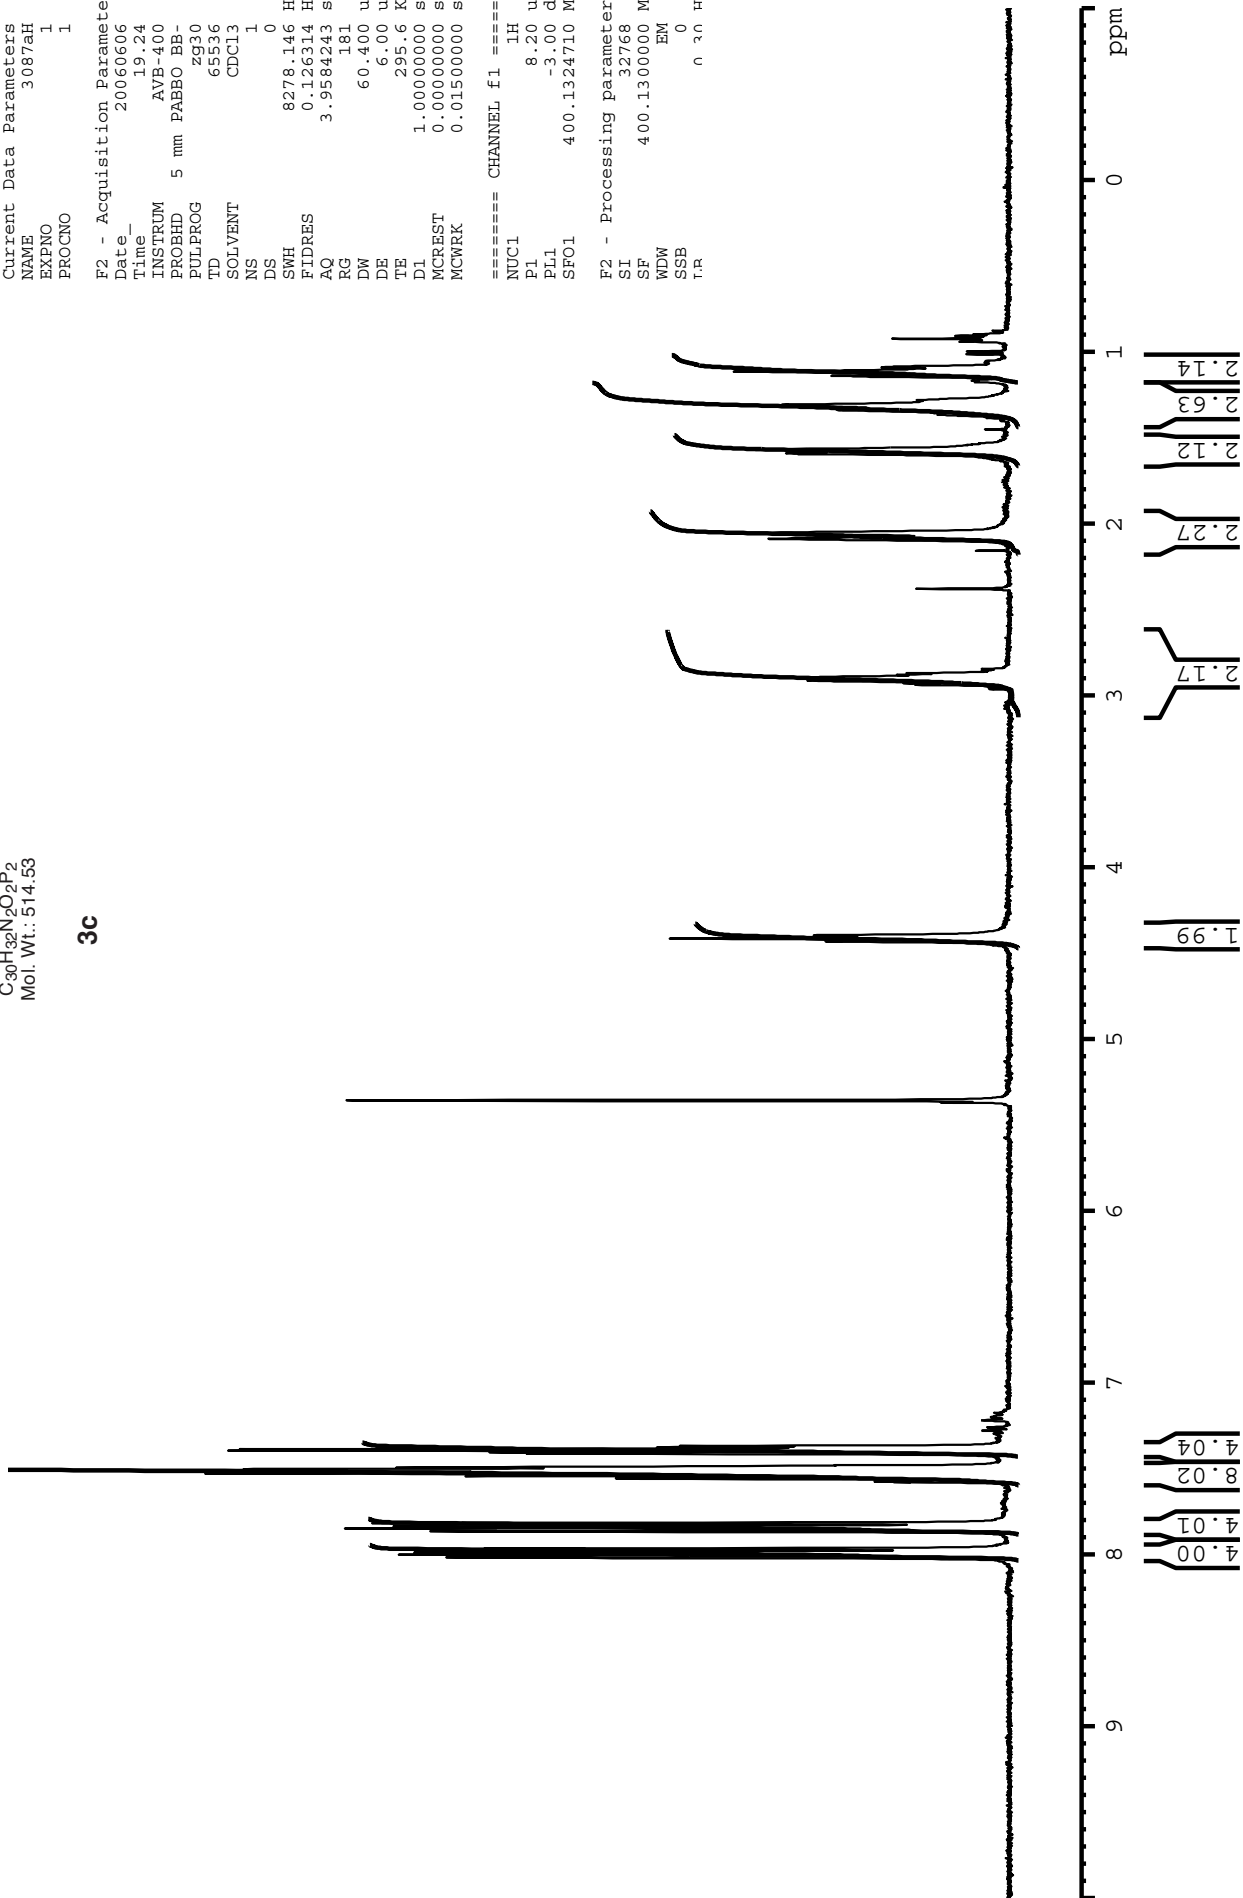

Supporting Information - Watson, Chiu and Bergman

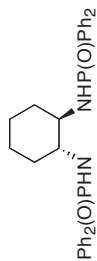

C<sub>30</sub>H<sub>32</sub>N<sub>2</sub>O<sub>2</sub>P<sub>2</sub>  
Mol. Wt.: 514.53

**3c**

```

Current Data Parameters
NAME          3087aC
EXPNO         1
PROCNO        1

F2 - Acquisition Parameters
Date_         20060606
Time         19.27
INSTRUM       AVB-400
PROBHD        5 mm PABBO BB-
PULPROG       zgpg30
TD            65536
SOLVENT       CDCl3
NS            1.45
DS            0
SWH           23980.814 Hz
FIDRES        0.365918 Hz
AQ            1.3664756 sec
RG            16384
DE            20.850 usec
TE            296.2 K
D1            1.5000000 sec
d11           0.0300000 sec
DELTA         1.39999998 sec
MCREST        0.0000000 sec
MCWRK         0.01500000 sec

===== CHANNEL f1 =====
NUC1          13C
P1            8.50 usec
PL1           -2.00 dB
SFO1          100.6228298 MHz

===== CHANNEL f2 =====
    
```

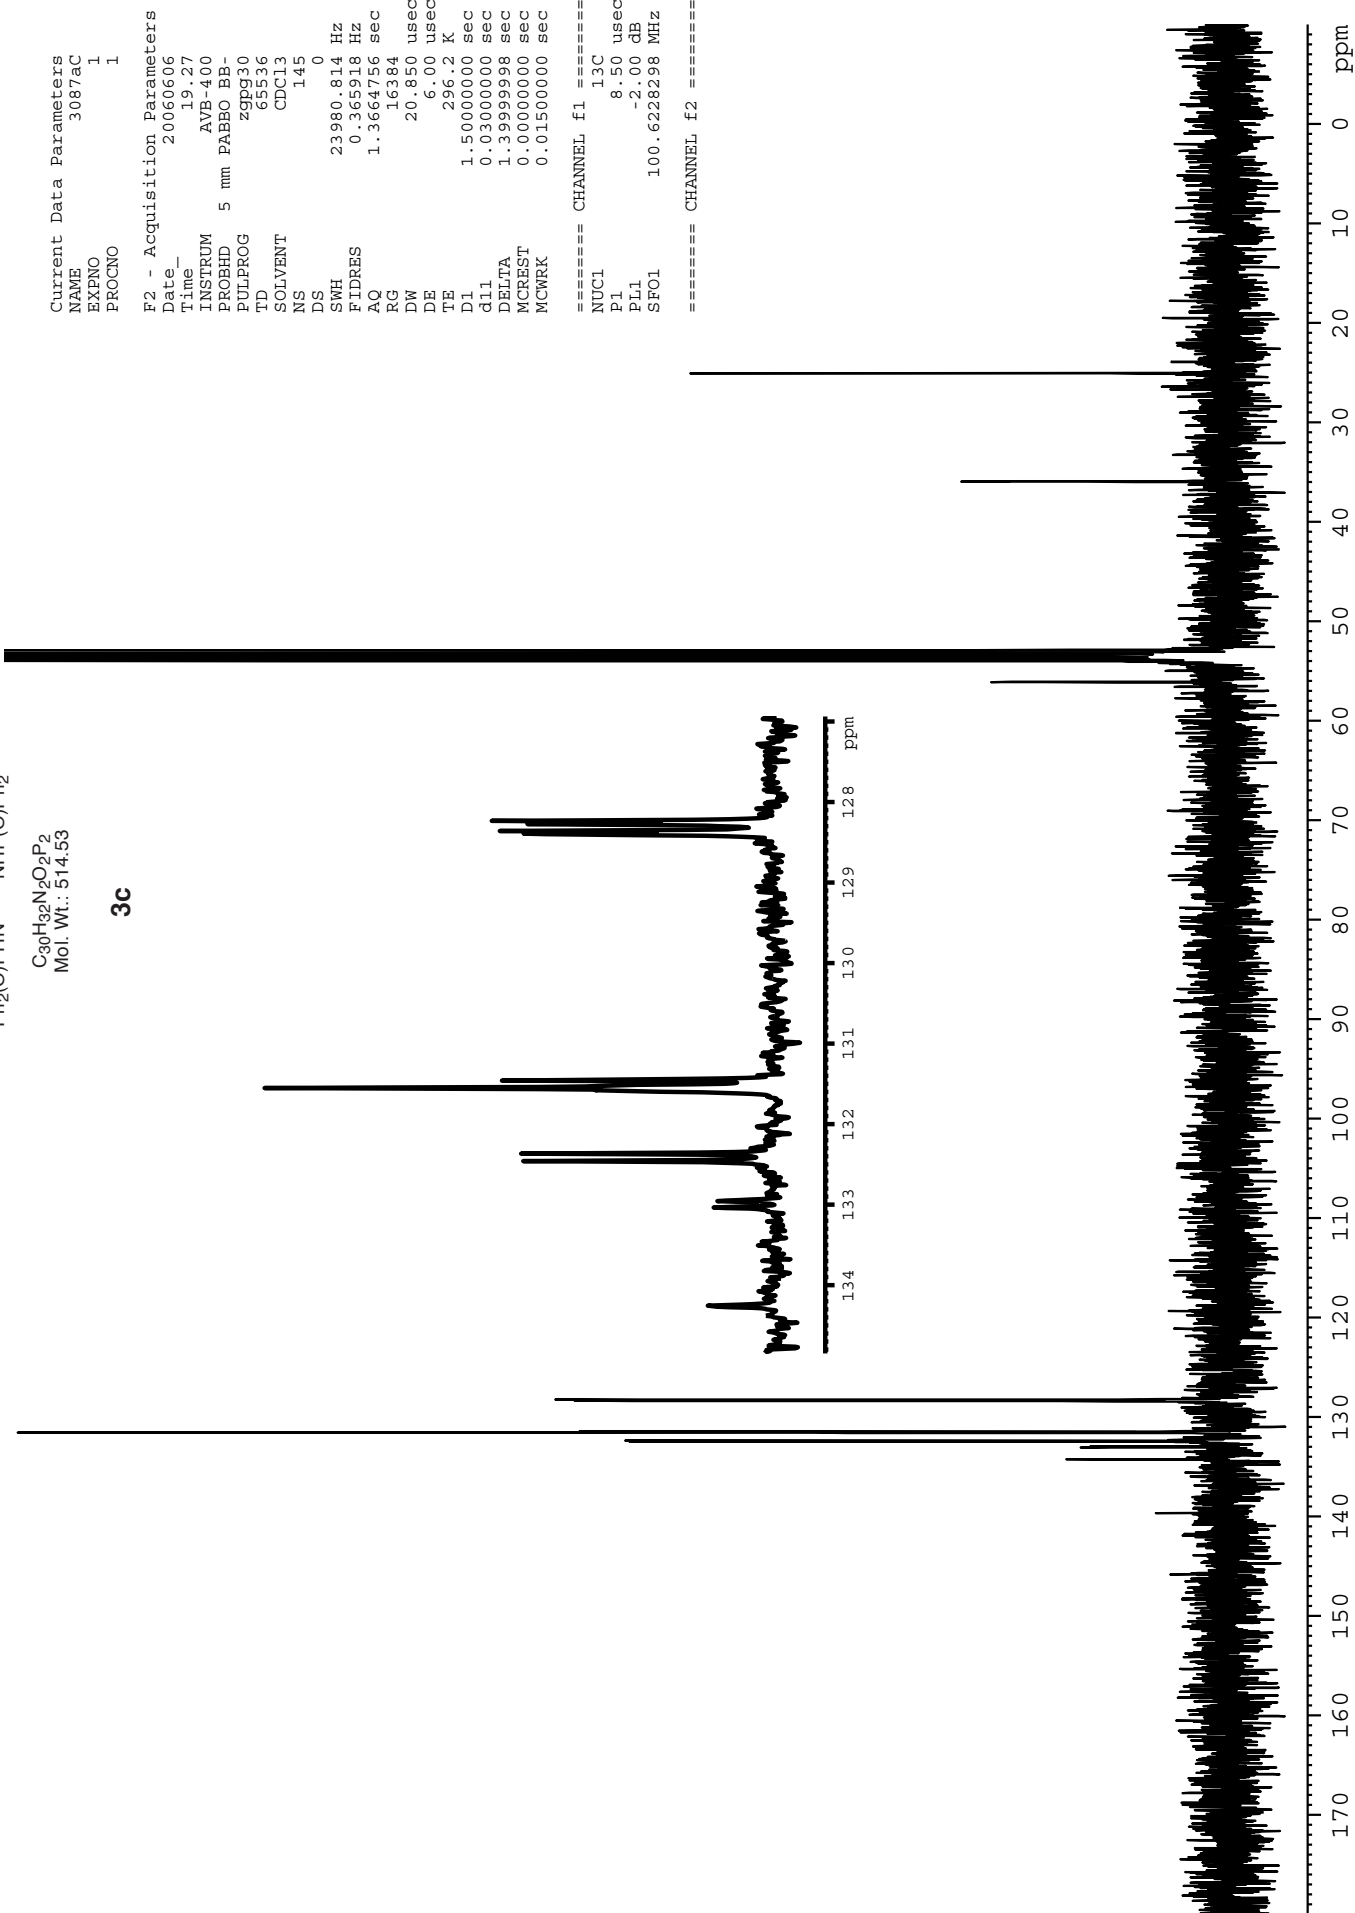

13C DRX-500 5mm ZBBO probe  
 starting parameters with zgpg30  
 uses ns\*td0

132.10  
132.11  
131.48  
128.27  
128.17  
128.09  
127.99  
127.82  
127.48  
126.82

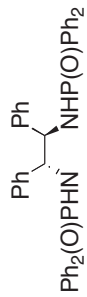

$\text{C}_{38}\text{H}_{34}\text{N}_2\text{O}_2\text{P}_2$   
 Mol. Wt.: 612.64

9

61.65  
53.80  
53.59  
53.37  
53.15  
52.94

Current Data Parameters  
 NAME 3088C  
 EXPNO 1  
 PROCNO 1

F2 - Acquisition Parameters  
 Date\_ 20060606  
 Time 21.28  
 INSTRUM DRX-500  
 PROBD 5 mm BBO BB-1H  
 PULPROG zgpg30  
 TD 131072  
 SOLVENT CDCl3  
 NS 448  
 DS 0  
 SWH 30864.197 Hz  
 FIDRES 0.235475 Hz  
 AQ 2.1234164 sec  
 RG 16384  
 DW 16.200 usec  
 DE 5.00 usec  
 TE 293.0 K  
 D1 1.5000000 sec  
 d11 0.0300000 sec  
 DELTA 1.39999998 sec  
 MCREST 0.0000000 sec  
 MCWRK 0.01500000 sec

==== CHANNEL f1 =====  
 NUC1 13C  
 P1 8.70 usec  
 PL1 -3.00 dB  
 SFO1 125.7722011 MHz

==== CHANNEL f2 =====

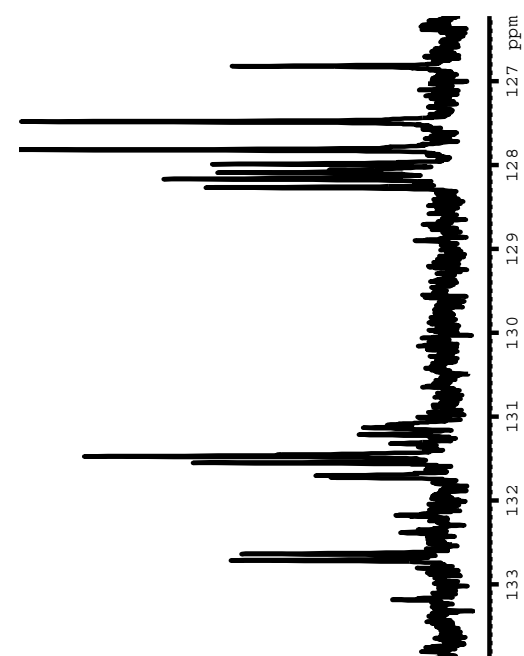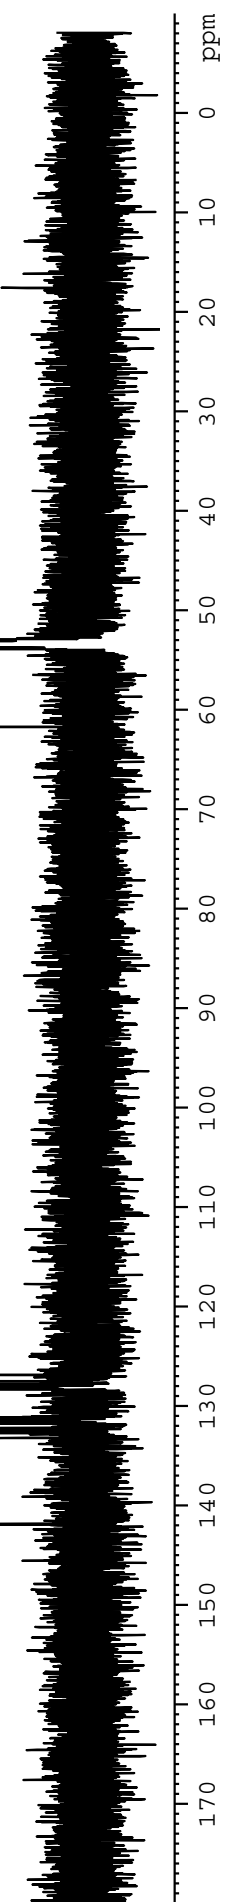

Supporting Information - Watson, Chiu and Bergman

S30

1H starting parameters (zg30)  
 DRX-500 zBBO probe

7.785  
7.769  
7.762  
7.746  
7.732  
7.632  
7.615  
7.608  
7.592  
7.526  
7.511  
7.487  
7.412  
7.397  
7.382  
7.232  
7.103  
7.080  
7.066  
6.891  
6.877  
6.186

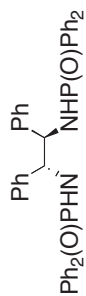

C<sub>28</sub>H<sub>34</sub>N<sub>2</sub>O<sub>2</sub>P<sub>2</sub>  
 Mol. Wt.: 612.64

9

Current Data Parameters  
 NAME 3088H  
 EXPNO 1  
 PROCNO 1

F2 - Acquisition Parameters  
 Date\_ 20060606  
 Time 21.25  
 INSTRUM DRX-500  
 PROBHD 5 mm BBO BB-IH  
 PULPROG zg30  
 TD 65536  
 SOLVENT CDCl<sub>3</sub>  
 NS 1  
 DS 0  
 SWH 10000.000 Hz  
 FIDRES 0.152588 Hz  
 AQ 3.2768500 sec  
 RG 322.5  
 DW 50.000 use  
 DE 7.11 use  
 TE 293.0 K  
 D1 1.0000000 sec  
 MCREST 0.0000000 sec  
 MCWRK 0.01500000 sec

==== CHANNEL f1 =====  
 NUC1 1H  
 P1 12.20 use  
 PL1 -5.00 dB  
 SFO1 500.1330883 MHz

F2 - Processing parameters  
 SI 65536  
 SF 500.1300127 MHz  
 WDW EM  
 SSB 0  
 LR 0.20 Hz

1.353

4.316

5.335

6.186

6.877

6.891

7.066

7.080

7.103

7.232

7.382

7.397

7.412

7.487

7.511

7.526

7.592

7.608

7.615

7.632

7.746

7.762

7.769

7.785

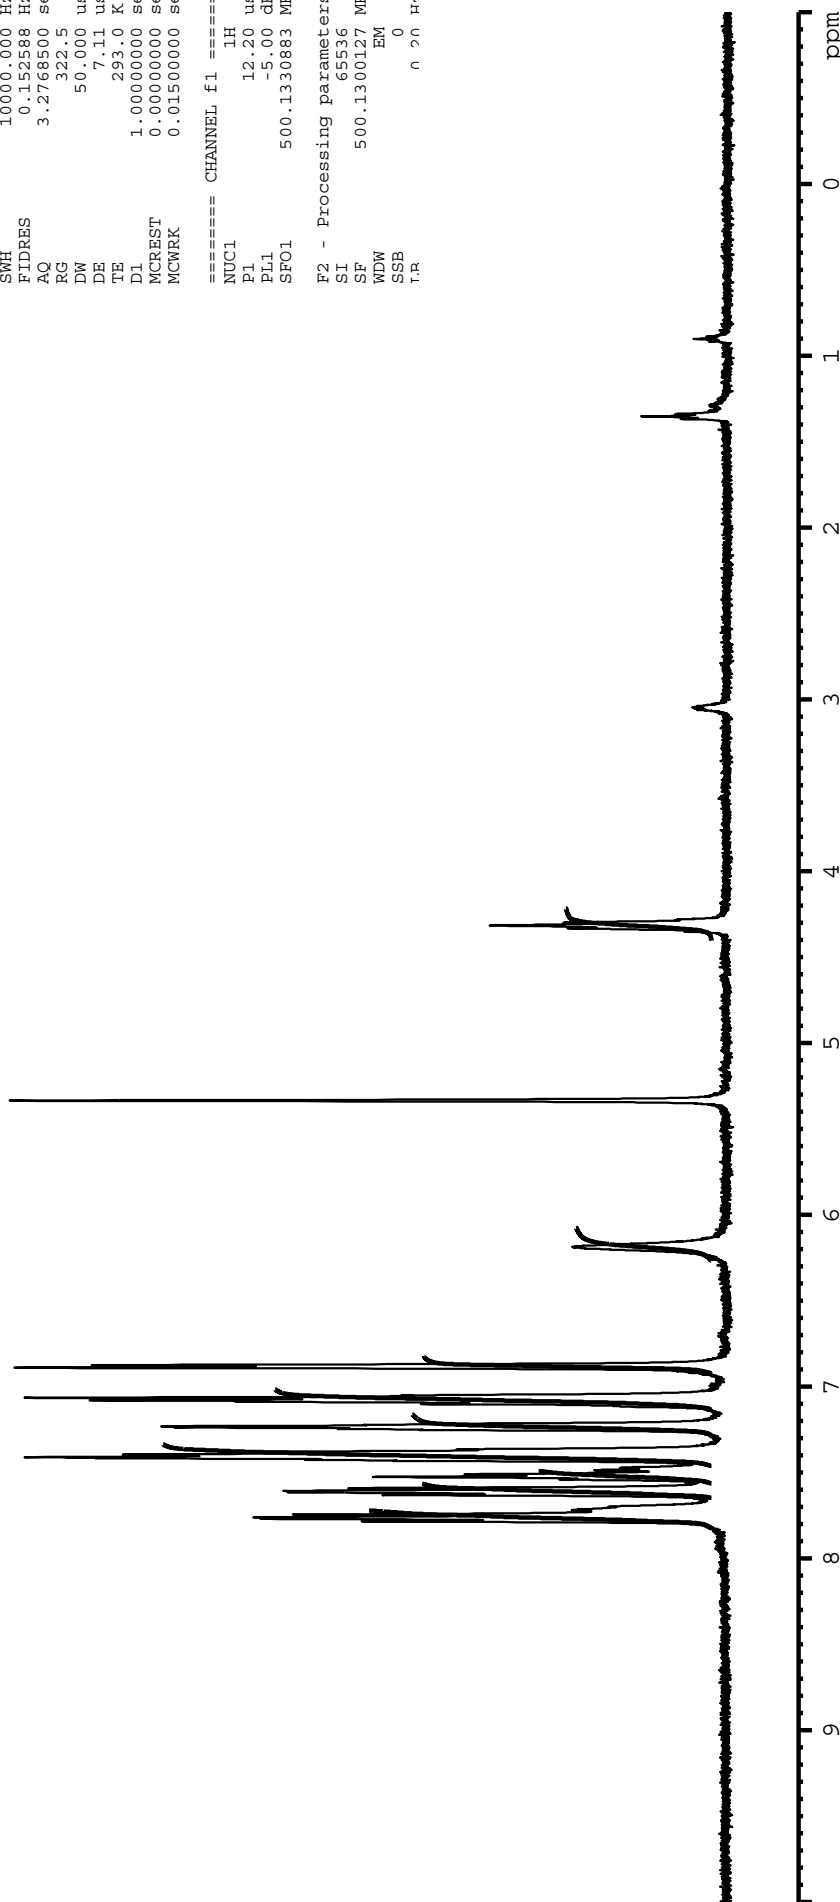

2.02

1.87

3.98

6.04

4.14

7.59

2.39

4.00

4.74

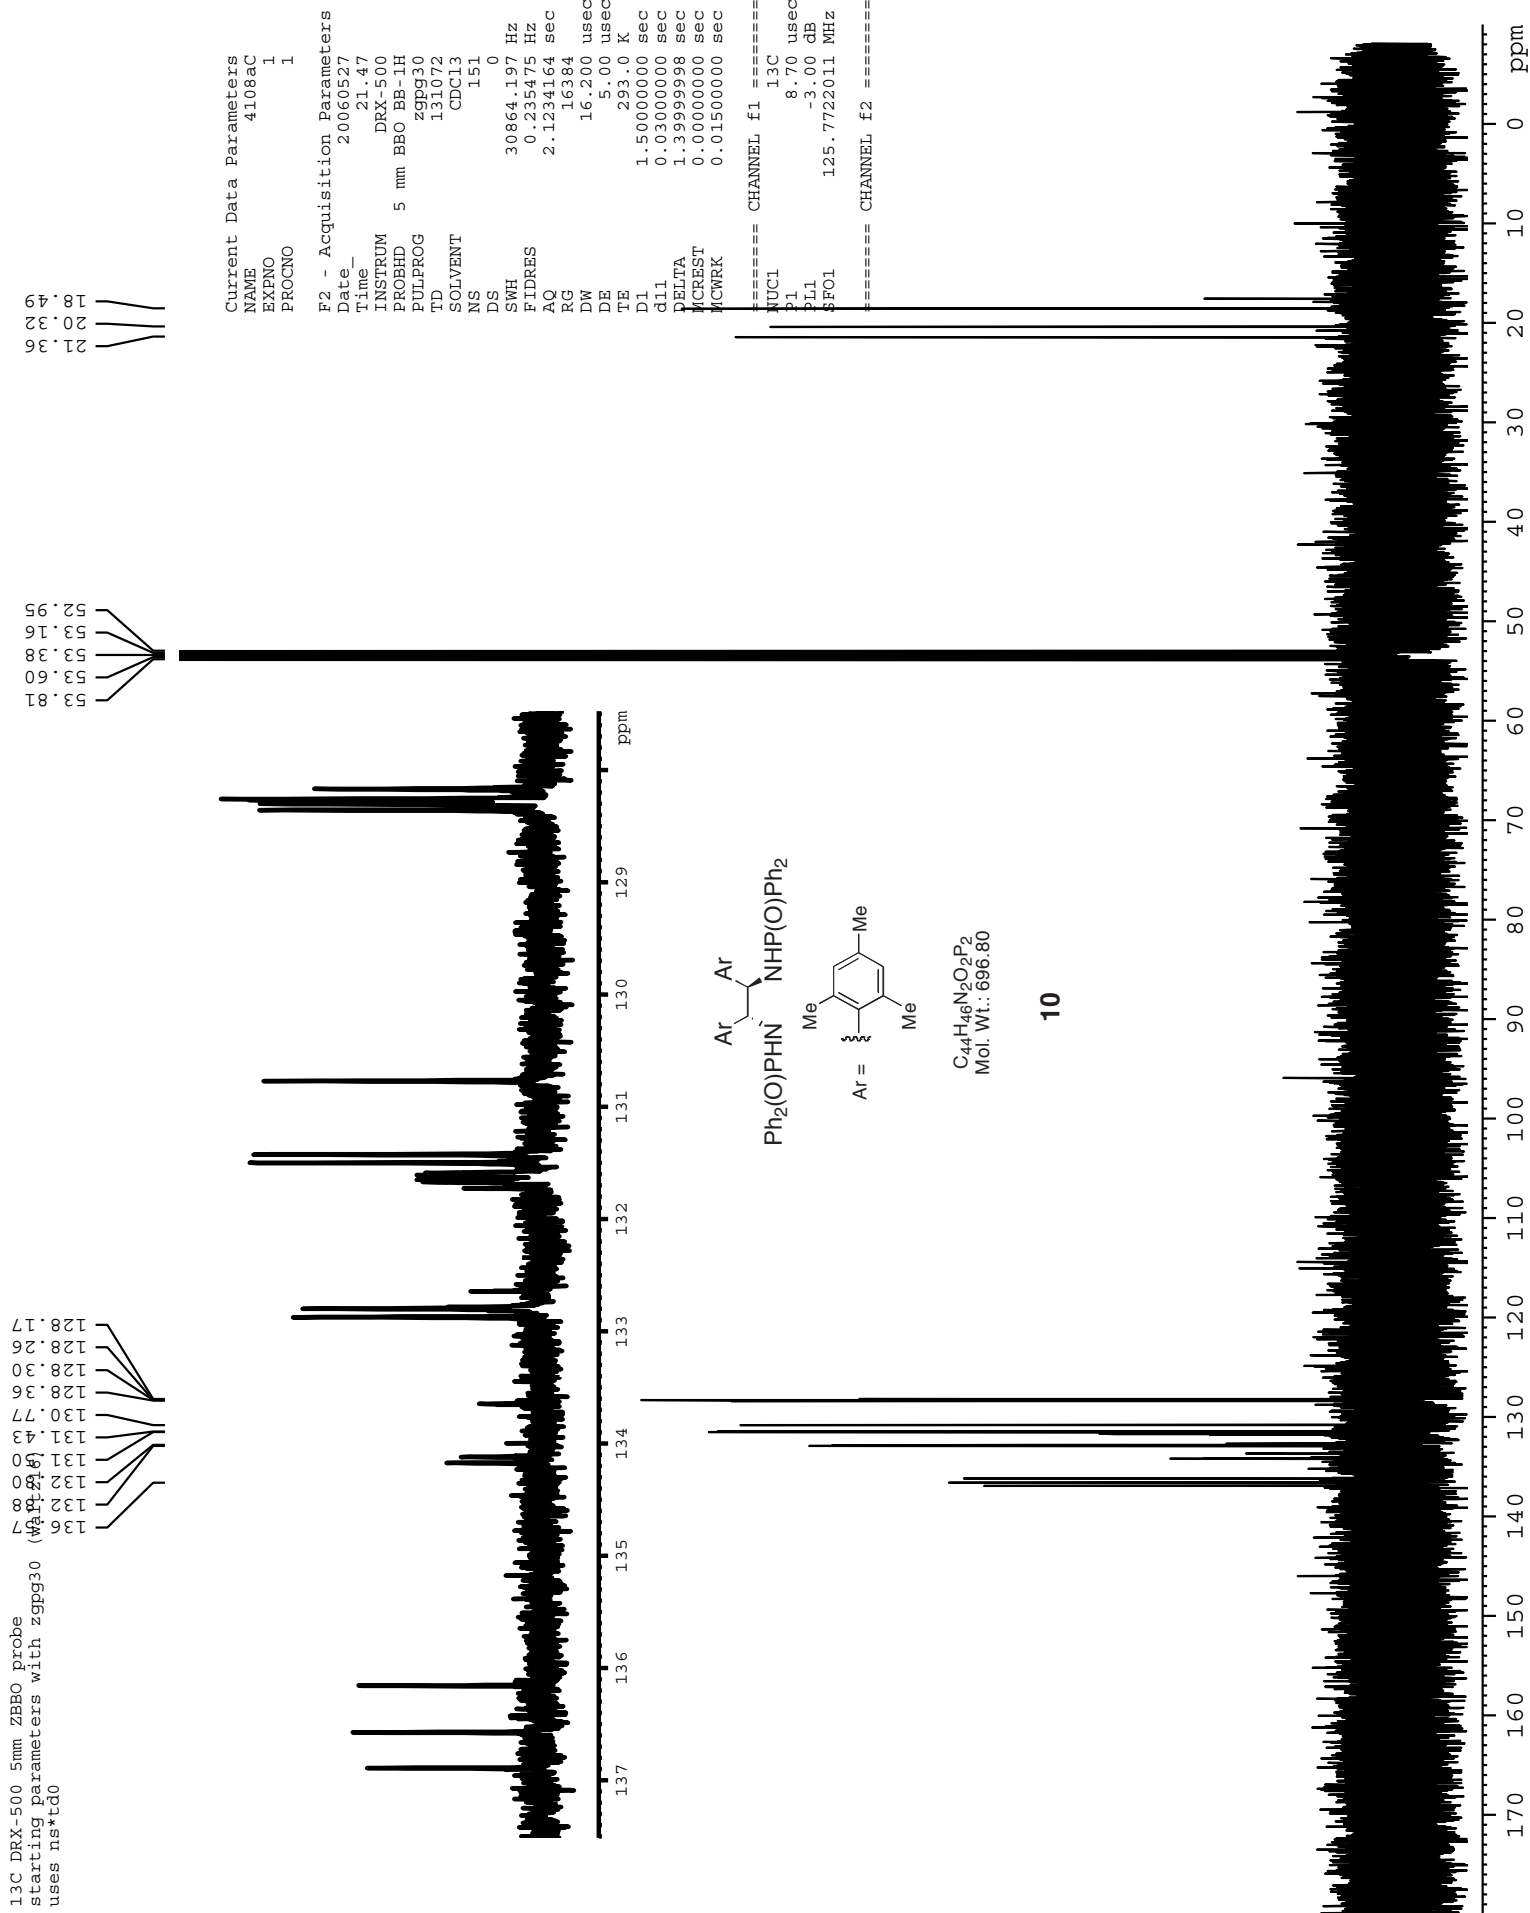

1H starting parameters (zg30)  
 DRX-500 zBBO probe  
 000004 11-11

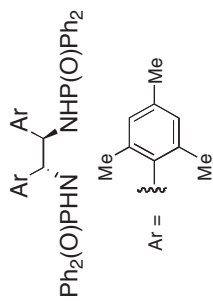

C<sub>44</sub>H<sub>46</sub>N<sub>2</sub>O<sub>2</sub>P<sub>2</sub>  
 Mol. Wt.: 696.80

10

Supporting Information - Watson, Chiu and Bergman

Current Data Parameters  
 NAME 4108ah  
 EXPNO 1  
 PROCNO 1

F2 - Acquisition Parameters  
 Date\_ 20060527  
 Time\_ 21.40  
 INSTRUM DRX-500  
 PROBHD 5 mm BBO BB-IH  
 PULPROG zg30  
 TD 65536  
 SOLVENT CD2Cl2  
 NS 8  
 DS 0  
 SWH 10000.000 Hz  
 FIDRES 0.152588 Hz  
 AQ 3.2768500 sec  
 RG 114  
 DW 50.000 use  
 DE 7.11 use  
 TE 293.0 K  
 D1 1.0000000 sec  
 MCREST 0.0000000 sec  
 MCWRK 0.01500000 sec

==== CHANNEL f1 =====  
 NUC1 1H  
 P1 12.20 use  
 PL1 -5.00 dB  
 SFO1 500.1330883 MHz

F2 - Processing parameters  
 SI 65536  
 SF 500.1300127 MHz  
 WDW EM  
 SSB 0  
 LB 0.20 Hz

2.696  
 2.273  
 2.148  
 1.821  
 1.435  
 1.290  
 0.870  
 0.746

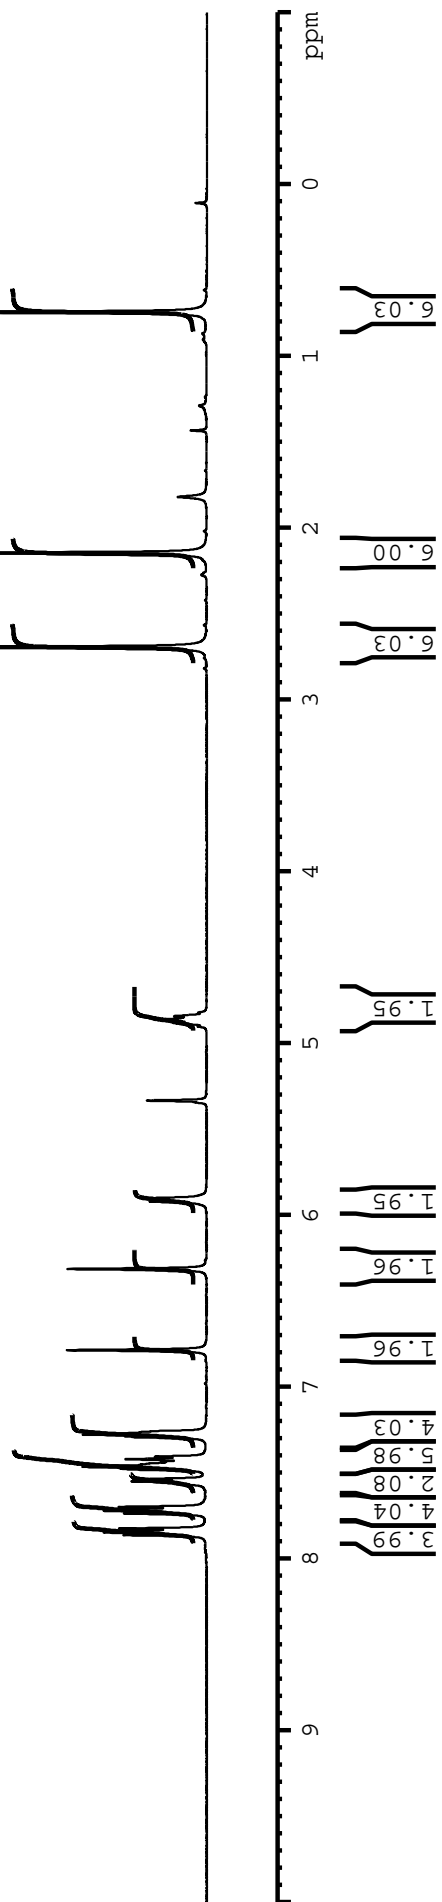







13C DRX-500 5mm ZBBO probe  
 starting parameters with zgpg30 (waltz16)  
 uses ns\*td0

124.47  
 124.40  
 118.96  
 118.90  
 116.99  
 116.91  
 116.83  
 116.75

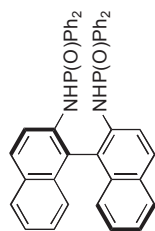

**12**  
 $C_{44}H_{34}N_2O_2P_2$   
 Mol. Wt.: 684.70

Current Data Parameters  
 NAME 3064C  
 EXPNO 1  
 PROCNO 1

F2 - Acquisition Parameters  
 Date\_ 20060607  
 Time 0.09  
 INSTRUM DRX-500  
 PROBHD 5 mm BBO BB-1H  
 PULPROG zgpg30  
 TD 131072  
 SOLVENT CDCl3  
 NS 6842  
 DS 0  
 SWH 30864.197 Hz  
 FIDRES 0.235475 Hz  
 AQ 2.1234164 sec  
 RG 16384  
 DW 16.200 usec  
 DE 5.00 usec  
 TE 293.0 K  
 D1 1.5000000 sec  
 d11 0.03000000 sec  
 DELTA 1.39999998 sec  
 MCREST 0.0000000 sec  
 MCWRK 0.01500000 sec

==== CHANNEL f1 =====  
 NUC1 13C  
 P1 8.70 usec  
 PL1 -3.00 dB  
 SFO1 125.7722011 MHz

==== CHANNEL f2 =====

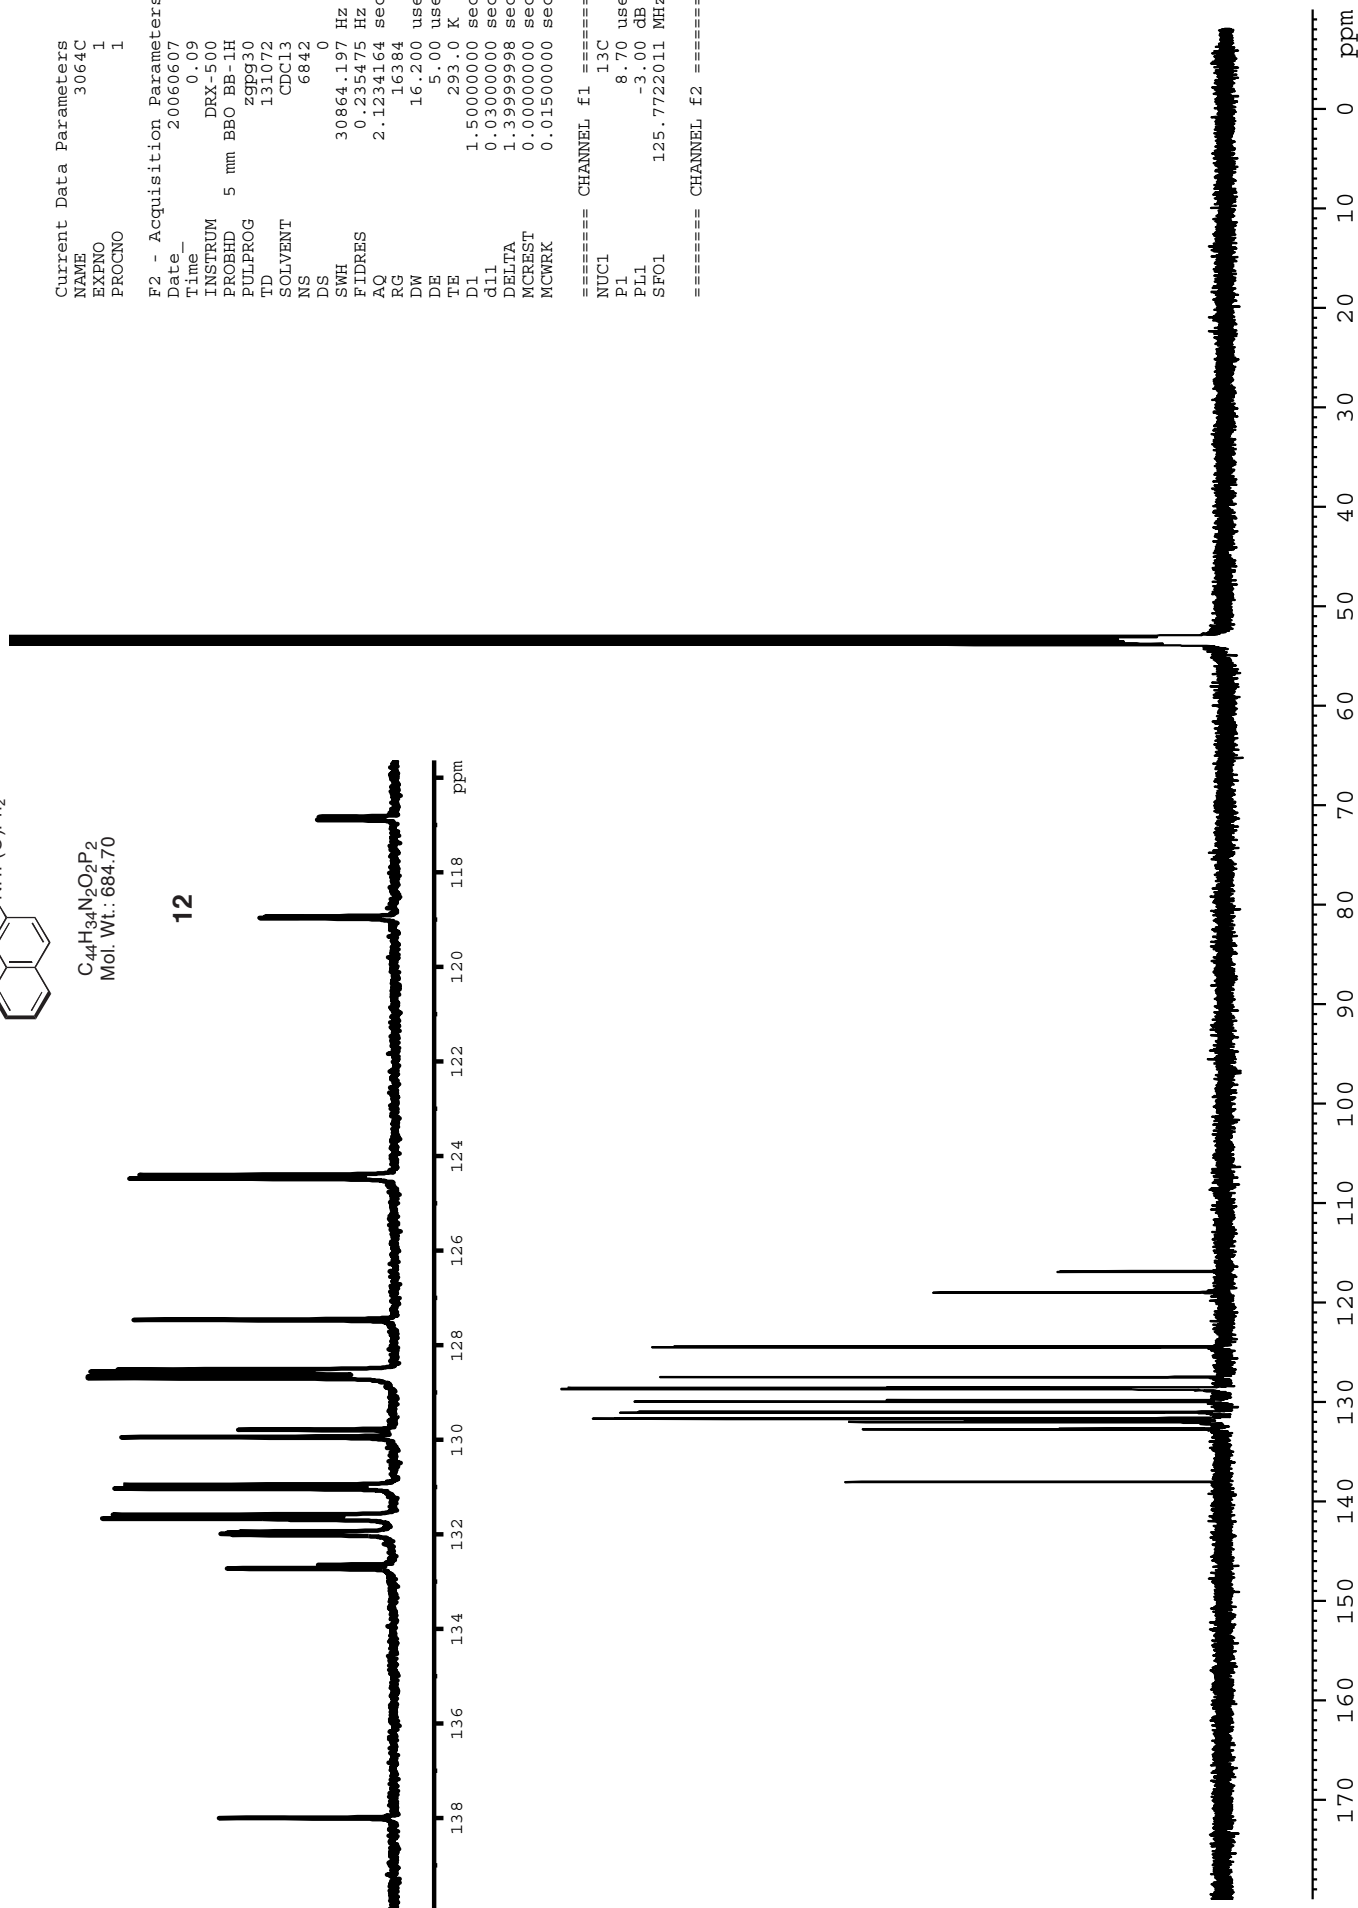



13C DRX-500 5mm ZBBO probe  
 starting parameters with zgpg30 (wat-zf1b)  
 uses ns\*td0

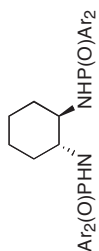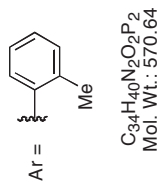

**13a**

Current Data Parameters  
 NAME 3083C  
 EXPNO 1  
 PROCNO 1

F2 - Acquisition Parameters  
 Date\_ 20060607  
 Time 15.52  
 INSTRUM DRX-500  
 PROBHD 5 mm BBO BB-1H  
 PULPROG zgpg30  
 TD 131072  
 SOLVENT CDC13  
 NS 577  
 DS 0  
 SWH 30864.197 Hz  
 FIDRES 0.235475 Hz  
 AQ 2.1234164 sec  
 RG 16384  
 DW 16.200 usec  
 DE 5.00 usec  
 TE 293.0 K  
 D1 1.5000000 sec  
 d11 0.0300000 sec  
 DELTA 1.39999998 sec  
 MCREST 0.0000000 sec  
 MCWRK 0.01500000 sec

==== CHANNEL f1 =====  
 NUC1 13C  
 P1 8.70 usec  
 PL1 -3.00 dB  
 SFO1 125.7722011 MHz

==== CHANNEL f2 =====

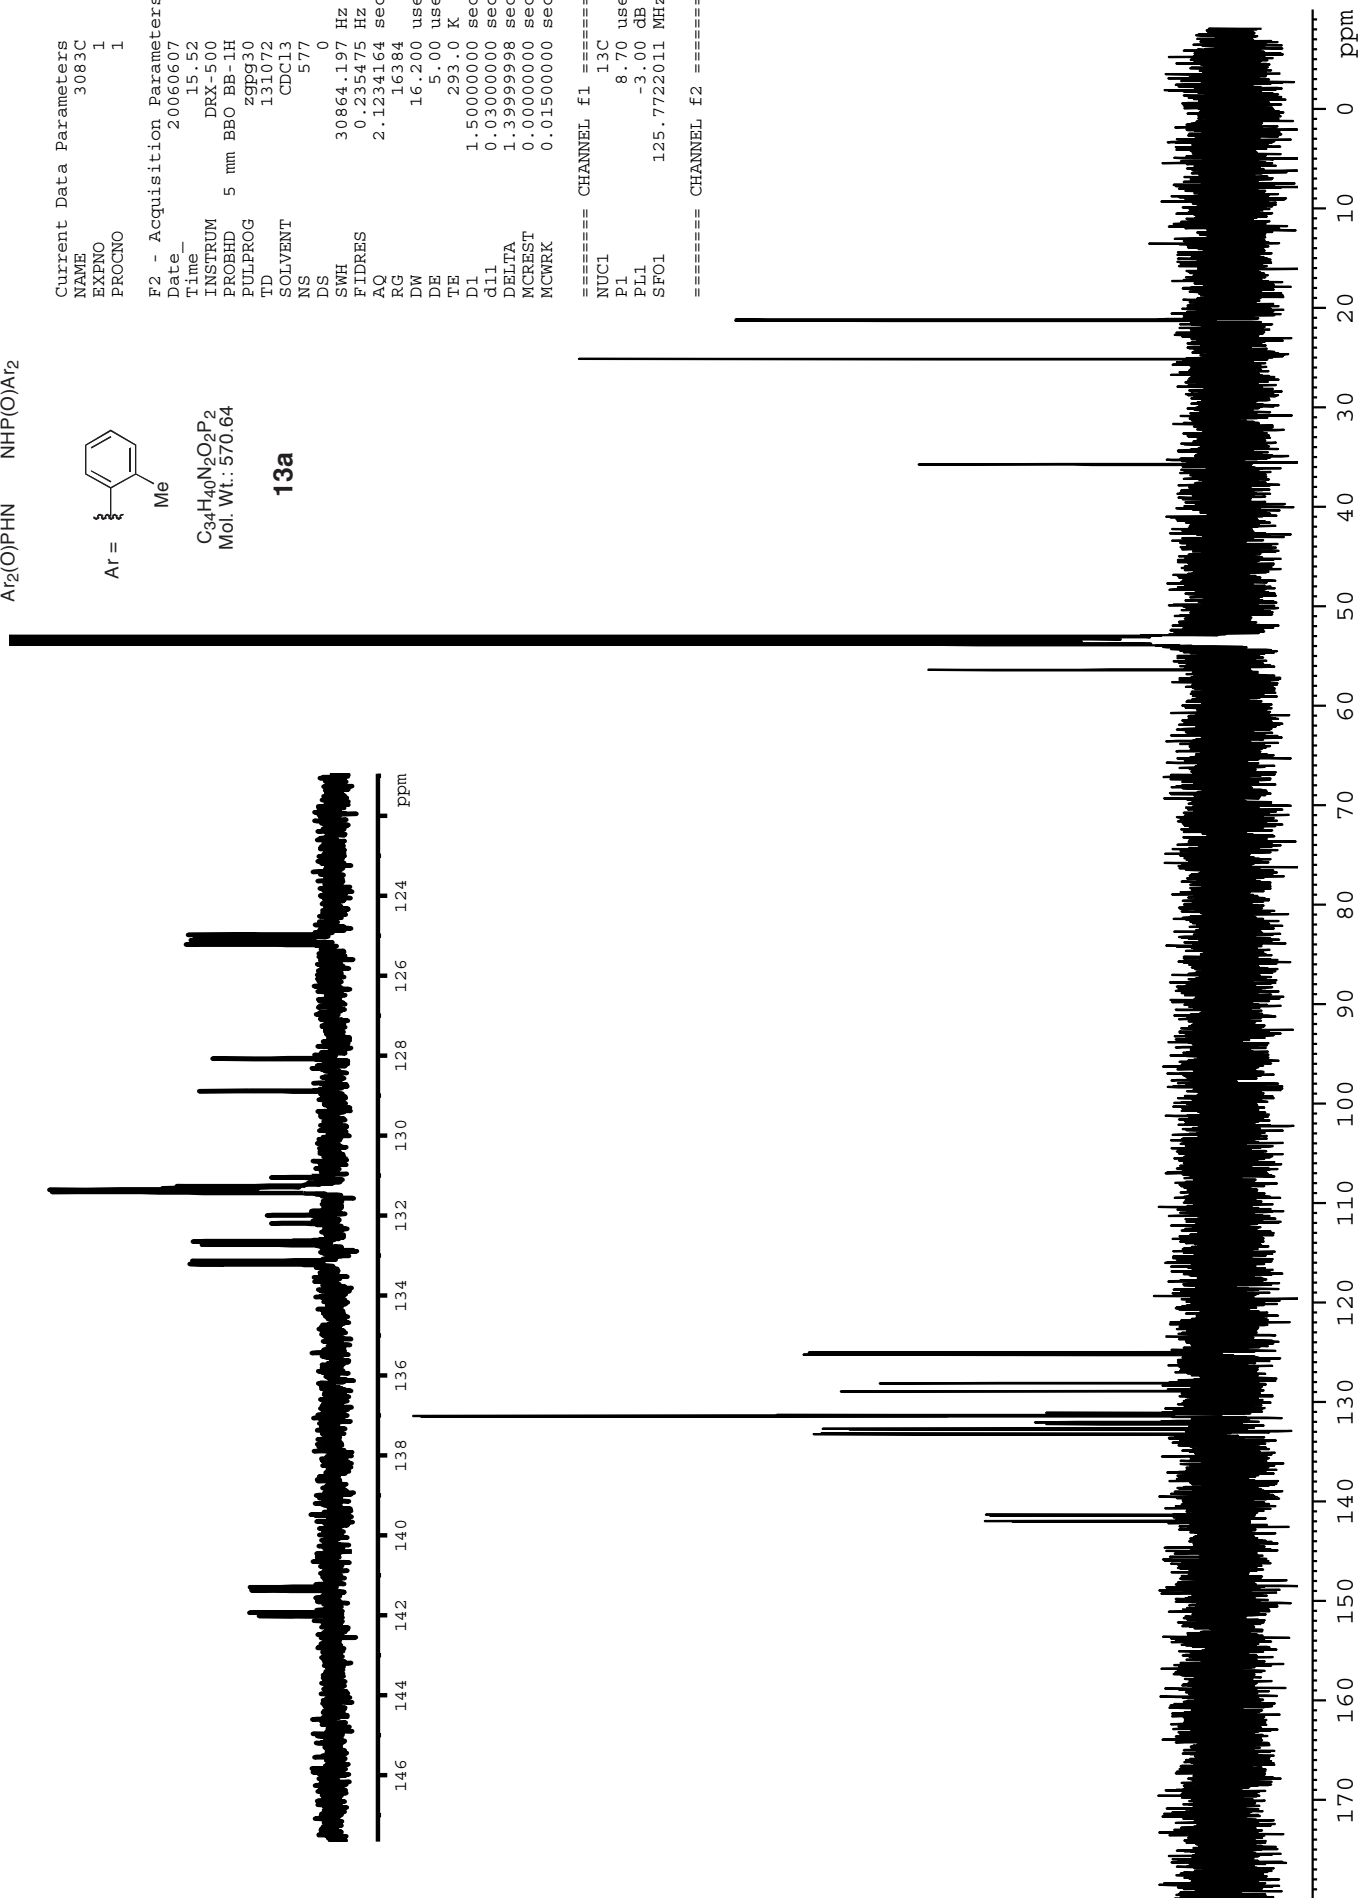

Supporting Information - Watson, Chiu and Bergman

S38

1H starting parameters (zg30)  
 DRX-500 zBBO probe

8.004  
 7.989  
 7.977  
 7.961  
 7.611  
 7.595  
 7.586  
 7.569  
 7.412  
 7.397  
 7.381  
 7.366  
 7.305  
 7.257  
 7.242  
 7.196  
 7.182  
 7.154  
 7.113

2.357  
 2.319  
 2.237  
 2.199  
 2.173  
 1.883  
 1.865  
 1.619  
 1.385  
 1.214

3.174

4.520

5.336

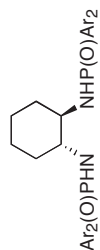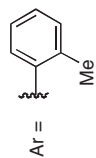

C<sub>34</sub>H<sub>40</sub>N<sub>2</sub>O<sub>2</sub>P<sub>2</sub>  
 Mol. Wt.: 570.64

13a

Current Data Parameters  
 NAME 3083H  
 EXPNO 1  
 PROCNO 1

F2 - Acquisition Parameters  
 Date\_ 20060607  
 Time 15.49  
 INSTRUM DRX-500  
 PROBHD 5 mm BBO BB-IH  
 PULPROG zg30  
 TD 65536  
 SOLVENT CDCl<sub>3</sub>

NS 1  
 DS 0  
 SWH 10000.000 Hz  
 FIDRES 0.152588 Hz  
 AQ 3.2768500 sec  
 RG 228.1  
 DW 50.000 use  
 DE 7.11 use  
 TE 293.0 K  
 D1 1.0000000 sec  
 MCREST 0.0000000 sec  
 MCWRK 0.01500000 sec

==== CHANNEL f1 =====  
 NUC1 1H  
 P1 12.20 use  
 PL1 -5.00 dB  
 SFO1 500.1330883 MHz

F2 - Processing parameters  
 SI 65536  
 SF 500.1300127 MHz  
 WDW EM  
 SSB 0  
 LR 0.20 Hz

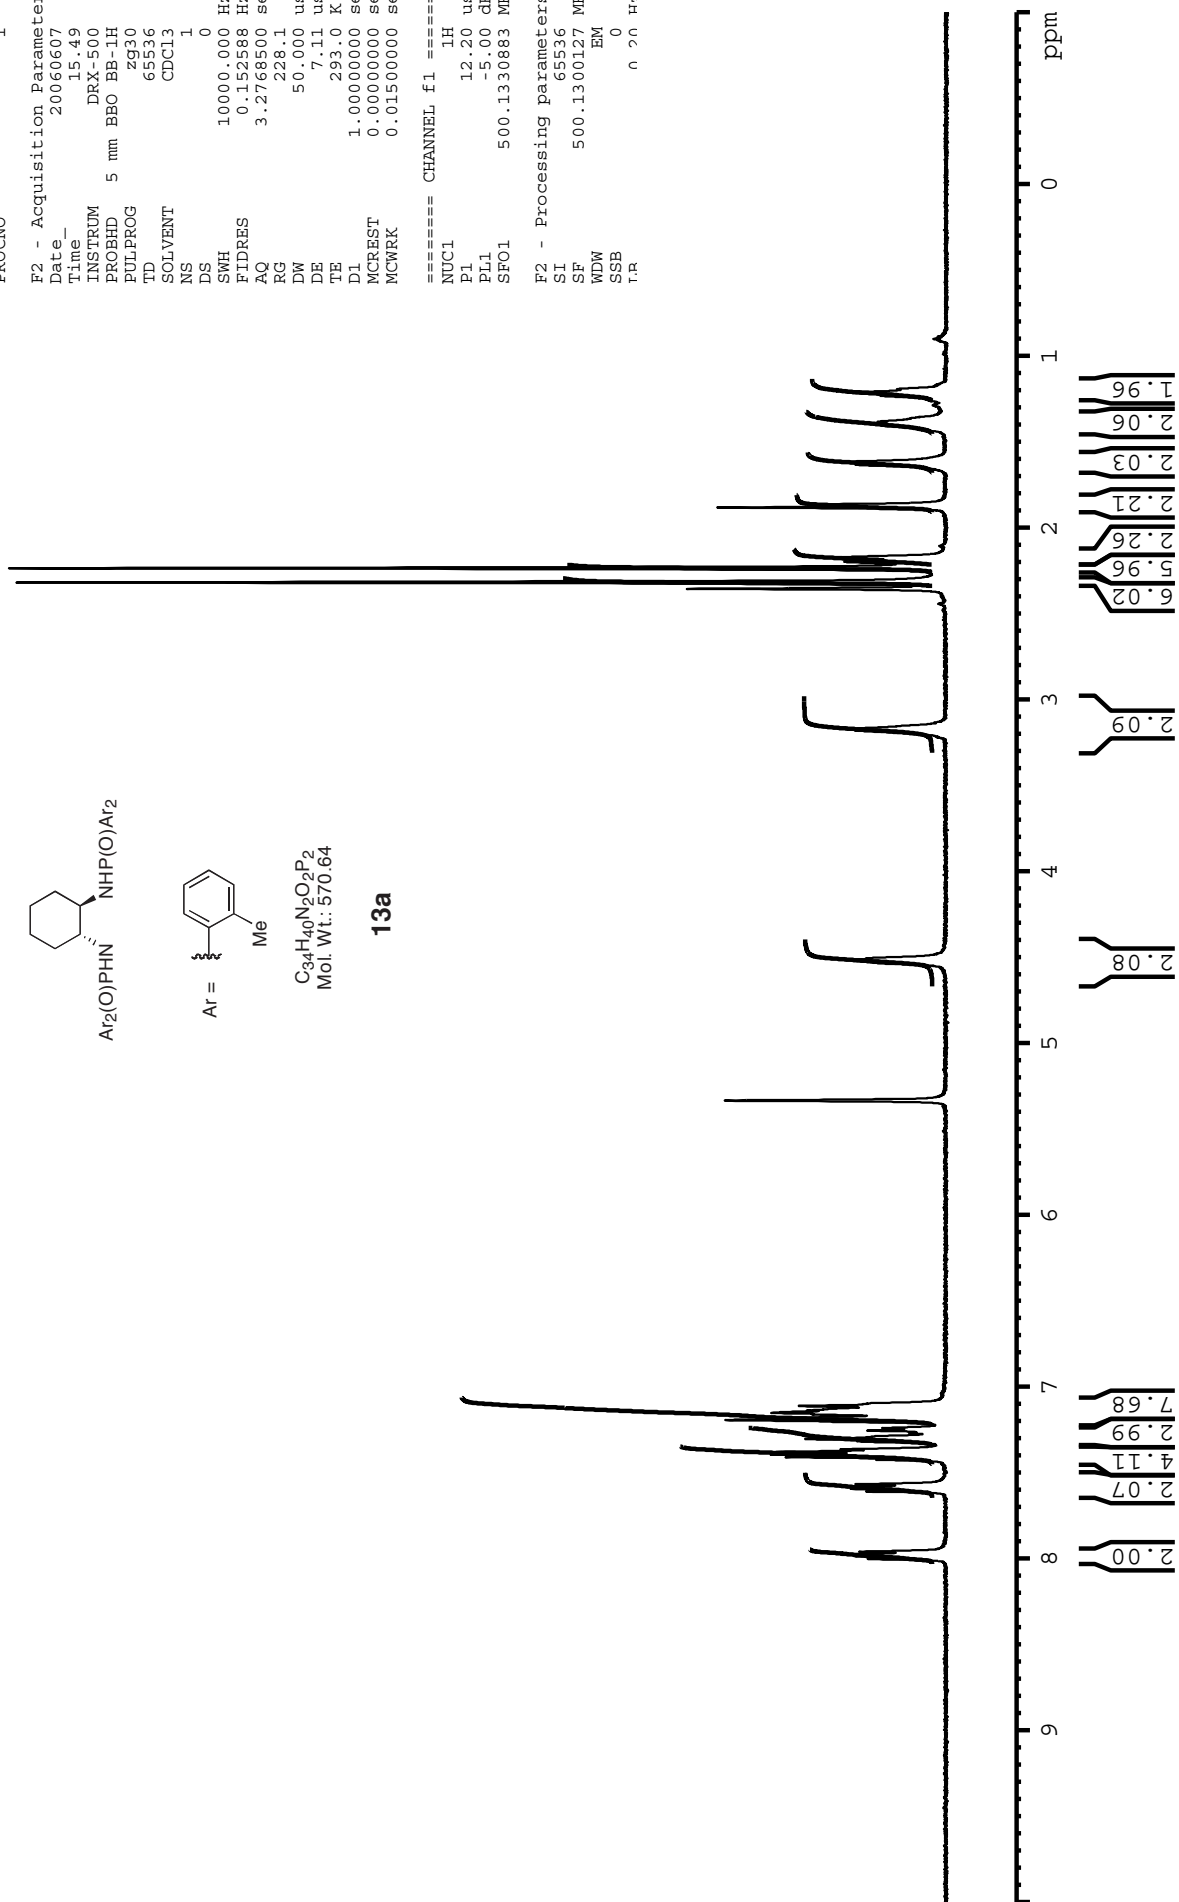

Supporting Information - Watson, Chiu and Bergman

Current Data Parameters  
 NAME 3189AH  
 EXPNO 1  
 PROCNO 1

F2 - Acquisition Parameters  
 Date\_ 20060606  
 Time 22.02  
 INSTRUM AVQ-400  
 PROBHD 5 mm QNP 1H/13  
 PULPROG zg30  
 TD 65536  
 SOLVENT CD2Cl2  
 NS 1  
 DS 0  
 SWH 8012.820 Hz  
 FIDRES 0.122266 Hz  
 AQ 4.0894966 sec  
 RG 256  
 DW 62.400 usec  
 DE 6.00 usec  
 TE 293.2 K  
 D1 1.0000000 sec  
 MCREST 0.0000000 sec  
 MCWRK 0.01500000 sec

==== CHANNEL f1 =====  
 NUC1 1H  
 P1 12.80 usec  
 PL1 0.00 dB  
 SFO1 400.1324700 MHz

F2 - Processing parameters  
 SI 65536  
 SF 400.1300142 MHz  
 WDM EM  
 SSB 0  
 LR 0 30 Hz

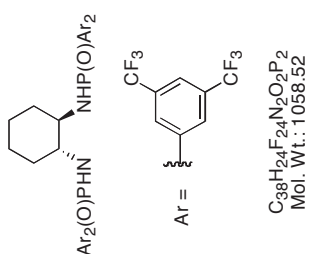

8.470  
8.440  
8.338  
8.309  
8.098  
8.063

5.322  
4.893

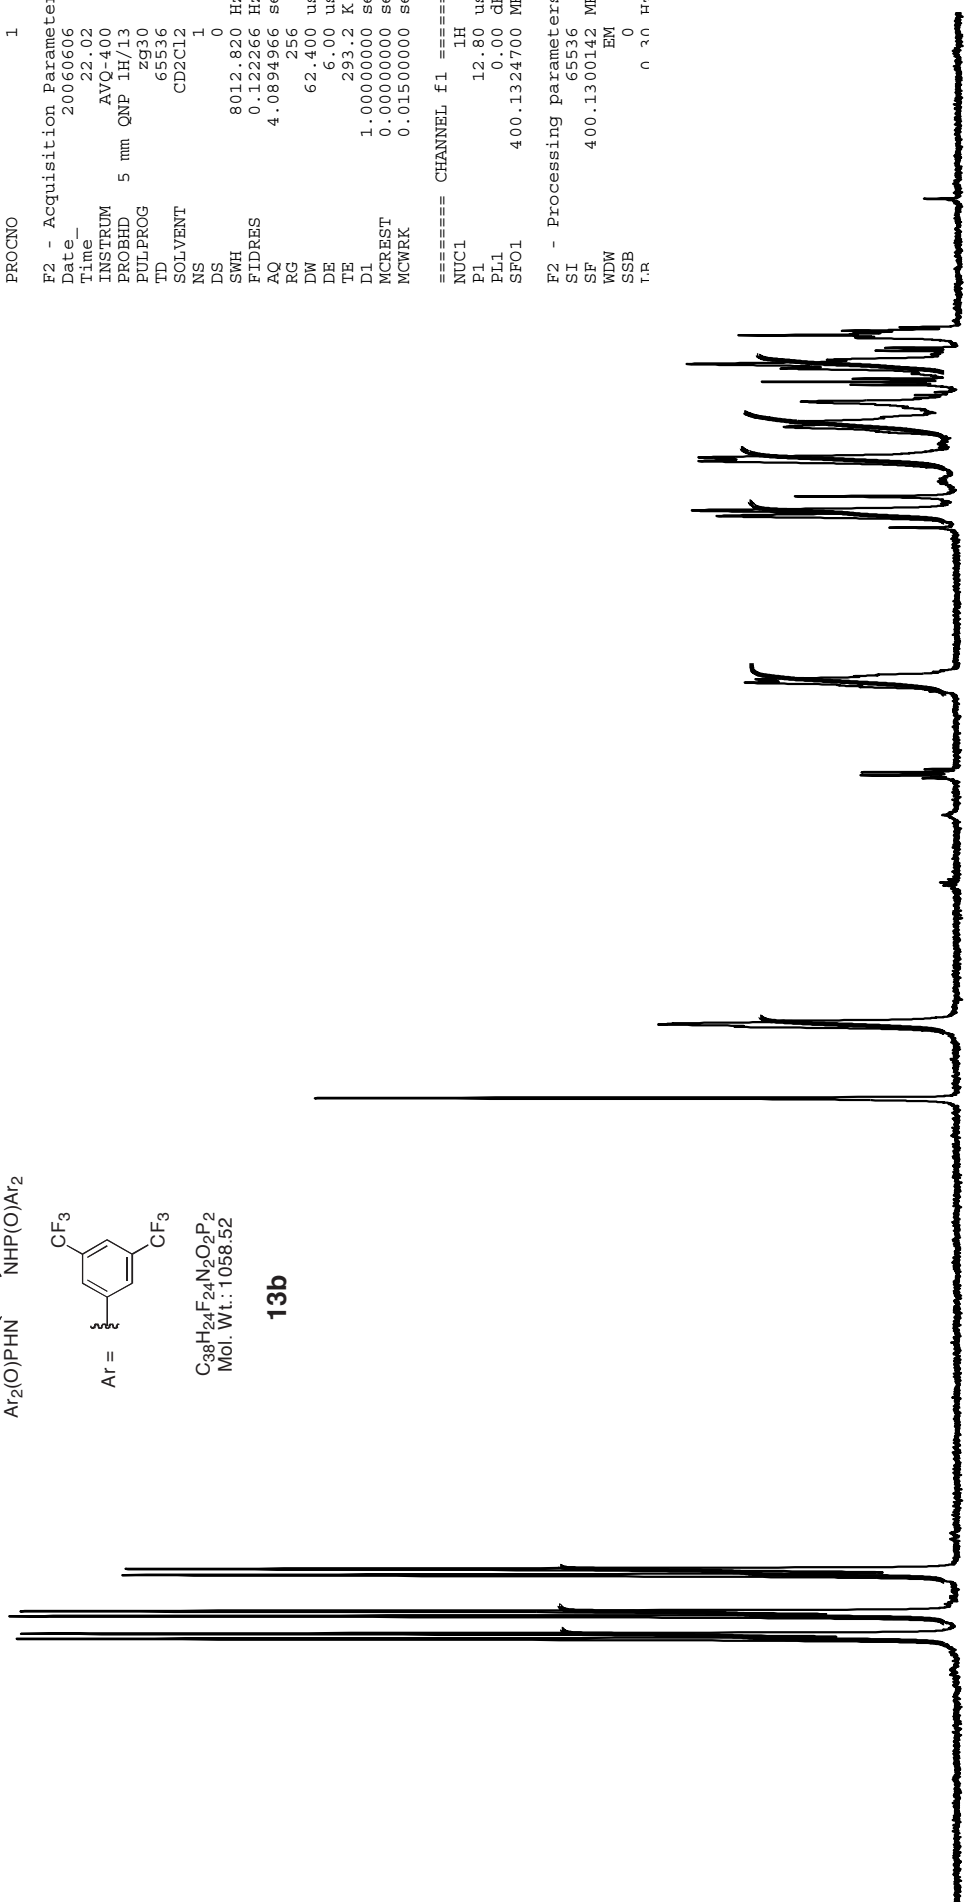

ppm

9 8 7 6 5 4 3 2 1 0

4.00  
4.03  
4.02

1.92

2.04  
2.12  
2.09  
1.96

## Supporting Information - Watson, Chiu and Bergman

S40

Current Data Parameters  
 NAME 3189aC  
 EXPNO 1  
 PROCNO 1

F2 - Acquisition Parameters  
 Date\_ 20060606  
 Time 22.09  
 INSTRUM AVQ-400  
 PROBHD 5 mm QNP 1H/13  
 PULPROG zgpg30  
 TD 65536  
 SOLVENT CDCl3  
 NS 829  
 DS 0  
 SWH 24038.461 Hz  
 FIDRES 0.366798 Hz  
 AQ 1.3631988 sec  
 RG 16384  
 DW 20.800 usec  
 DE 6.00 usec  
 TE 293.5 K  
 D1 2.0000000 sec  
 d11 0.0300000 sec  
 DELTA 1.89999998 sec  
 MCREST 0.0000000 sec  
 MCWRK 0.01500000 sec

==== CHANNEL f1 =====  
 NUC1 13C  
 P1 8.50 usec  
 PL1 -2.00 dB  
 SFO1 100.6228298 MHz

==== CHANNEL f2 =====

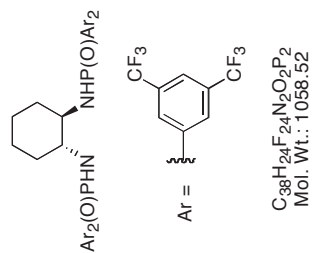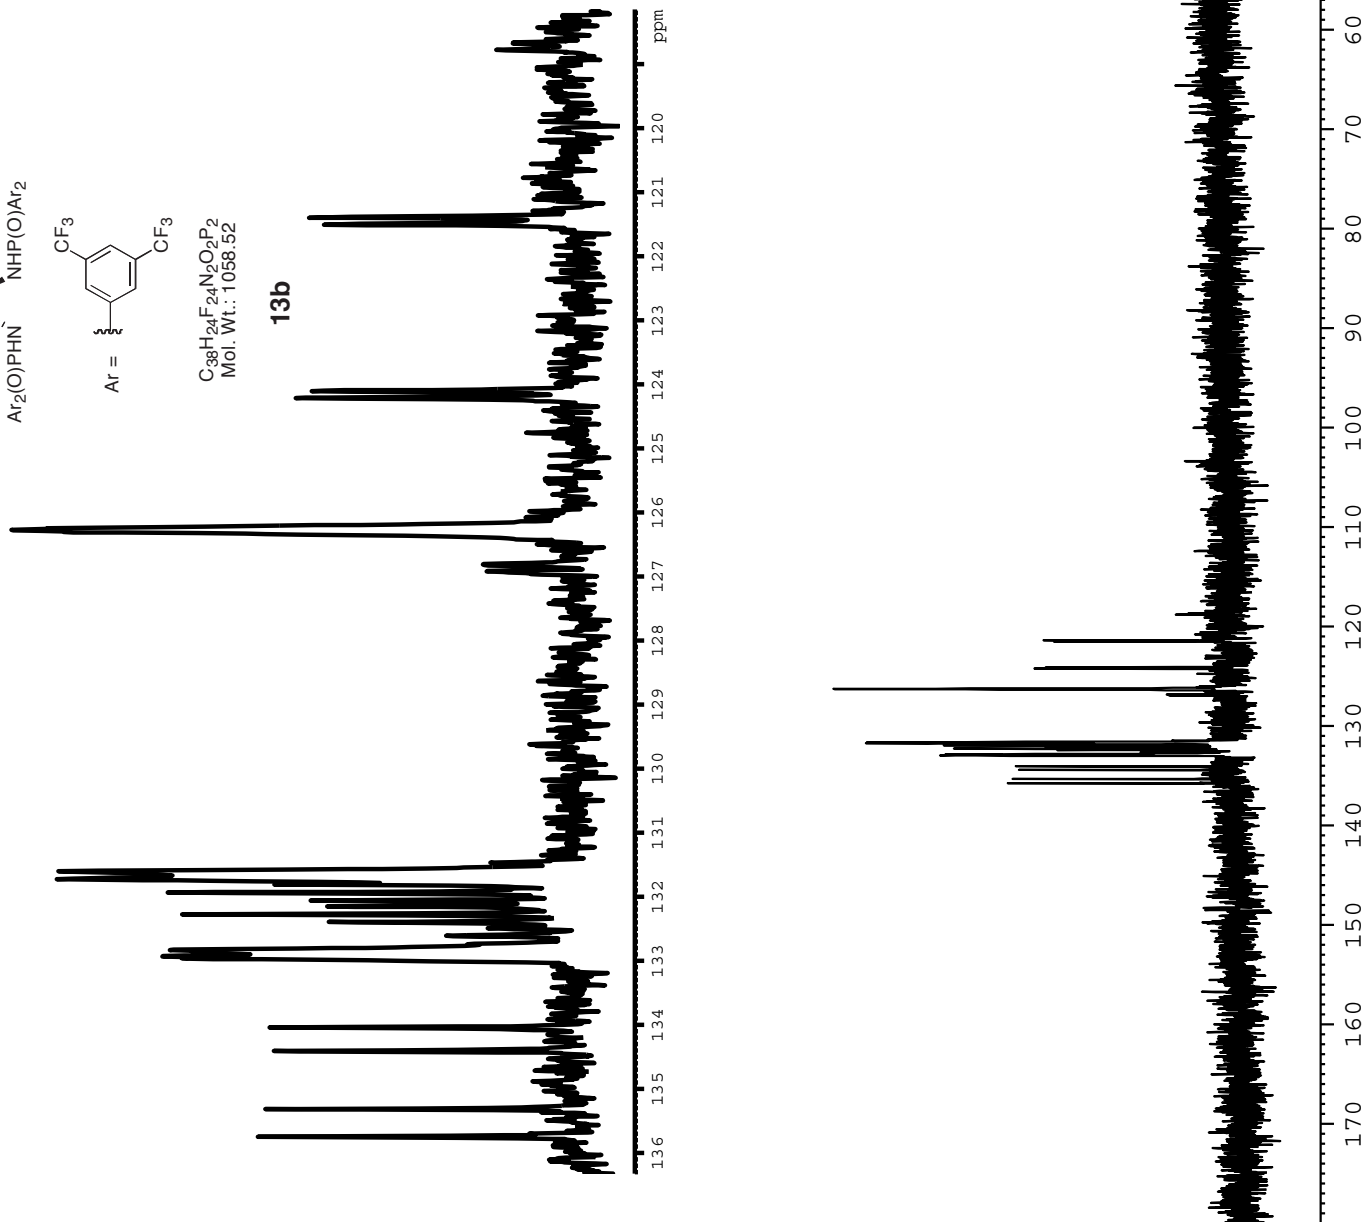



Current Data Parameters  
 NAME 4119aC  
 EXPNO 1  
 PROCNO 1  
 DU /u  
 USER DAW

F2 - Acquisition Parameters  
 Date\_ 20060610  
 Time\_ 12.34  
 INSTRUM AVB-400  
 PROBHD 5 mm PABBO BB-  
 PULPROG zgpg30  
 TD 65536  
 SOLVENT CDCl3  
 NS 1586  
 DS 0  
 SWH 23980.814 Hz  
 FIDRES 0.365918 Hz  
 AQ 1.3664756 sec  
 RG 16384  
 DW 20.850 usec  
 DE 6.00 usec  
 TE 295.1 K  
 D1 1.5000000 sec  
 d11 0.0300000 sec  
 DELTA 1.3999998 sec  
 MCREST 0.0000000 sec  
 MCWRK 0.0150000 sec

==== CHANNEL f1 =====  
 NUC1 13C  
 P1 8.50 usec  
 PL1 -2.00 dB  
 SFO1 100.6228298 MHz

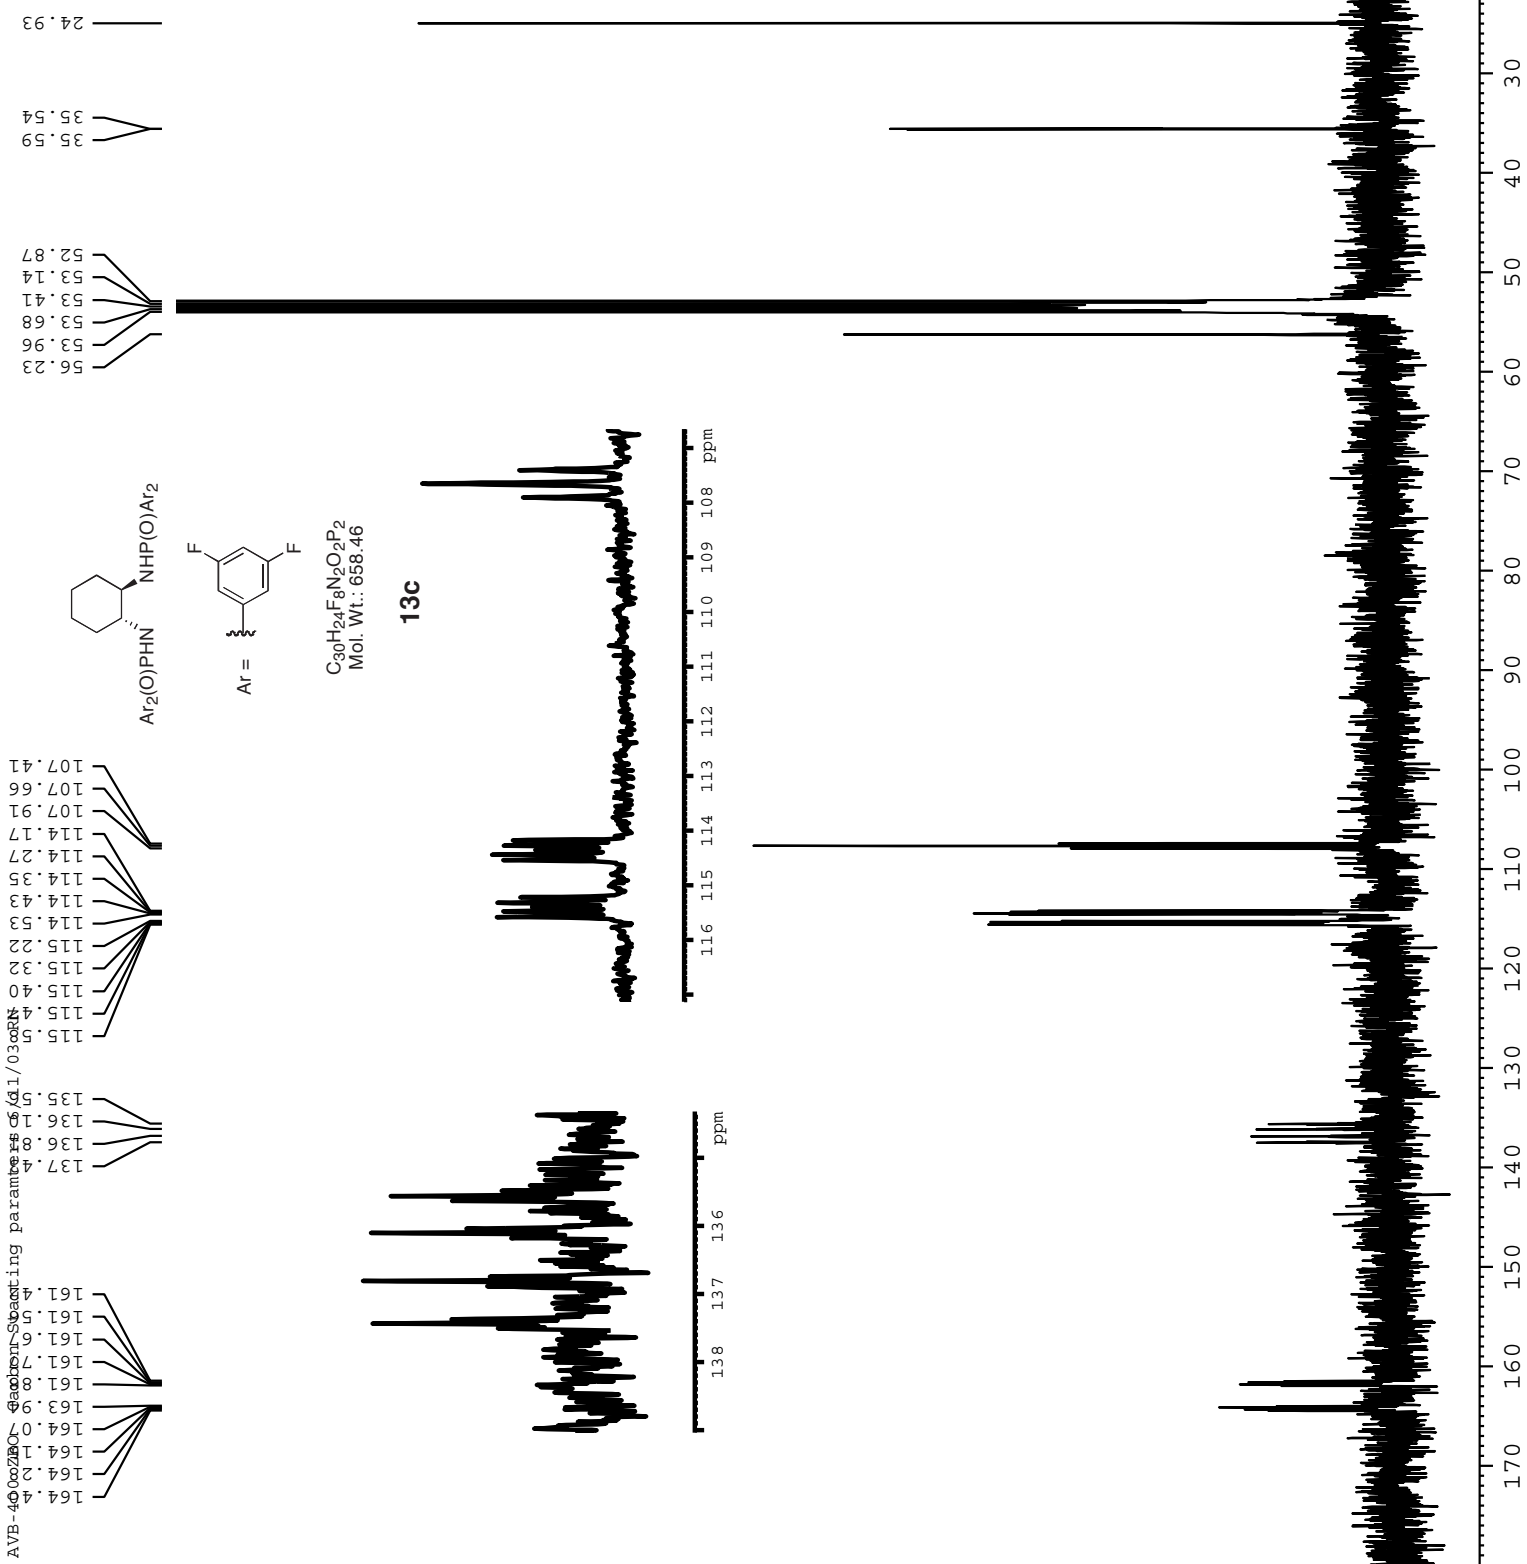

Supporting Information - Watson, Chiu and Bergman

7.520  
7.515  
7.506  
7.501  
7.497  
7.492  
7.488  
7.482  
7.376  
7.371  
7.362  
7.358  
7.353  
7.344  
7.339  
7.330  
7.326  
7.321  
7.078  
7.072  
7.066  
7.056  
7.051  
7.045  
7.035  
7.029  
7.023  
7.019  
7.013  
7.003  
6.997  
6.991  
6.981  
6.975  
6.970  
5.361  
5.358  
5.356  
4.829  
3.478  
3.461  
2.972  
2.964  
2.955  
2.929  
2.156  
2.039  
2.004  
1.790  
1.655  
1.635  
1.447  
1.397  
1.364  
1.267  
1.206  
1.188  
1.177  
1.171  
1.153  
1.128

Current Data Parameters  
 NAME 4119AH  
 EXPNO 1  
 PROCNO 1  
 DU /u  
 USER DAW

F2 - Acquisition Parameters  
 Date\_ 20060610  
 Time 12.32  
 INSTRUM AVB-400  
 PROBHD 5 mm PABBO BB-  
 PULPROG zg30  
 TD 65536  
 SOLVENT CD2Cl2  
 NS 1  
 DS 0  
 SWH 8278.146 Hz  
 FIDRES 0.126314 Hz  
 AQ 3.9584243 sec  
 RG 256  
 DW 60.400 usec  
 DE 6.00 usec  
 TE 294.5 K  
 DT 1.0000000 sec  
 MCREST 0.0000000 sec  
 MCWRK 0.0150000 sec

==== CHANNEL f1 =====  
 NUC1 1H  
 P1 8.20 usec  
 PL1 -3.00 dB  
 SFO1 400.1324710 MHz

F2 - Processing parameters  
 SI 32768  
 SF 400.1300000 MHz  
 WTMW RM

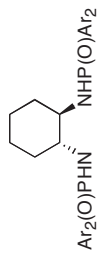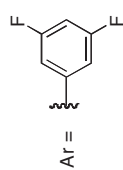

C<sub>30</sub>H<sub>24</sub>F<sub>8</sub>N<sub>2</sub>O<sub>2</sub>P<sub>2</sub>  
 Mol. Wt.: 658.46

13c

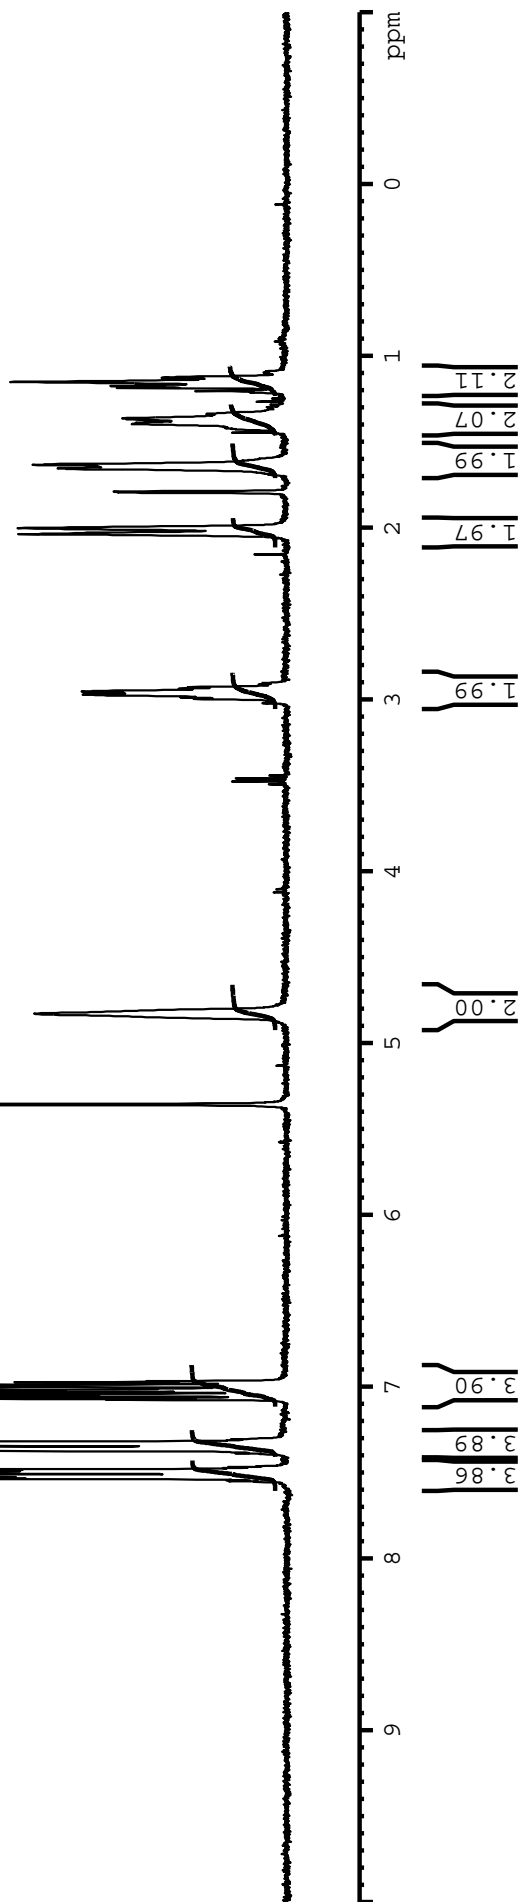

13C DRX-500 5mmQNPZABO probe  
 starting parameters with zgpg30 (wat-216)  
 uses ns\*td0

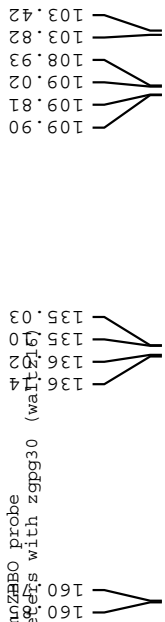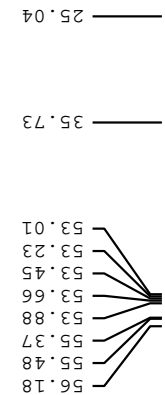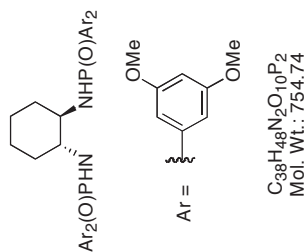

**13d**

```

Current Data Parameters
NAME           4120c
EXPNO         1
PROCNO        1

F2 - Acquisition Parameters
Date_         20060606
Time_        21.59
INSTRUM      DRX-500
PROBHD       5 mm BBO BB-1H
PULPROG      zgpg30
TD           131072
SOLVENT      CDCl3
NS           158
DS           0
SWH          30864.197 Hz
FIDRES       0.235475 Hz
AQ           2.1234164 sec
RG           16384
DE           16.200 usec
TE           293.0 K
D1           1.5000000 sec
d11          0.0300000 sec
DELTA        1.39999998 sec
MCREST       0.0000000 sec
MCWRK        0.01500000 sec

===== CHANNEL f1 =====
NUC1          13C
P1            8.70 usec
PL1          -3.00 dB
SFO1         125.7722011 MHz

===== CHANNEL f2 =====
    
```

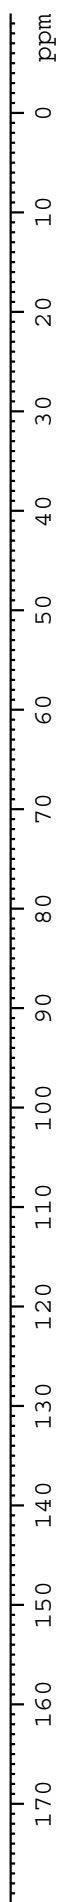

Supporting Information - Watson, Chiu and Bergman

0.883  
0.956  
0.973  
1.107  
1.135  
1.153  
1.170  
1.170  
1.292  
1.411  
1.560  
1.829  
2.046  
2.079  
2.895  
3.424  
3.442  
3.549  
3.611  
3.627  
3.681  
3.709  
3.732  
3.783  
3.810  
3.862  
3.890  
3.909  
3.987  
4.387  
4.405  
4.423  
5.322  
5.334  
5.518  
6.518  
6.523  
6.529  
6.565  
6.570  
6.576  
6.937  
6.943  
6.970  
6.976  
7.067  
7.073  
7.100  
7.106

Current Data Parameters  
 NAME 4120AH  
 EXPNO 1  
 PROCNO 1  
 F2 - Acquisition Parameters  
 Date\_ 20060601  
 Time\_ 15.11  
 INSTRUM AVQ-400  
 PROBDH 5 mm QNP 1H/13  
 PULPROG zg30  
 TD 65536  
 SOLVENT CD2Cl2  
 NS 1  
 DS 0  
 SWH 8012.820 Hz  
 FIDRES 0.122266 Hz  
 AQ 4.0894966 sec  
 RG 256  
 DW 62.400 usec  
 DE 6.00 usec  
 TE 293.4 K  
 D1 1.0000000 sec  
 MCREST 0.0000000 sec  
 MCWRK 0.01500000 sec  
 ===== CHANNEL f1 =====  
 NUC1 1H  
 P1 12.80 usec  
 PL1 0.00 dB  
 SFO1 400.1324700 MHz  
 F2 - Processing parameters  
 SI 65536  
 SF 400.1300142 MHz  
 WDW EM  
 SSB 0  
 GB 0  
 PR 0  
 AR 0  
 AS 0  
 SR 0  
 SSB 0  
 T.R 0

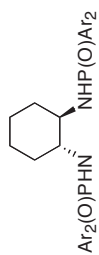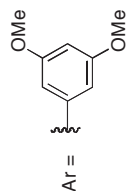

C<sub>38</sub>H<sub>48</sub>N<sub>2</sub>O<sub>10</sub>P<sub>2</sub>  
 Mol. Wt.: 754.74

13d

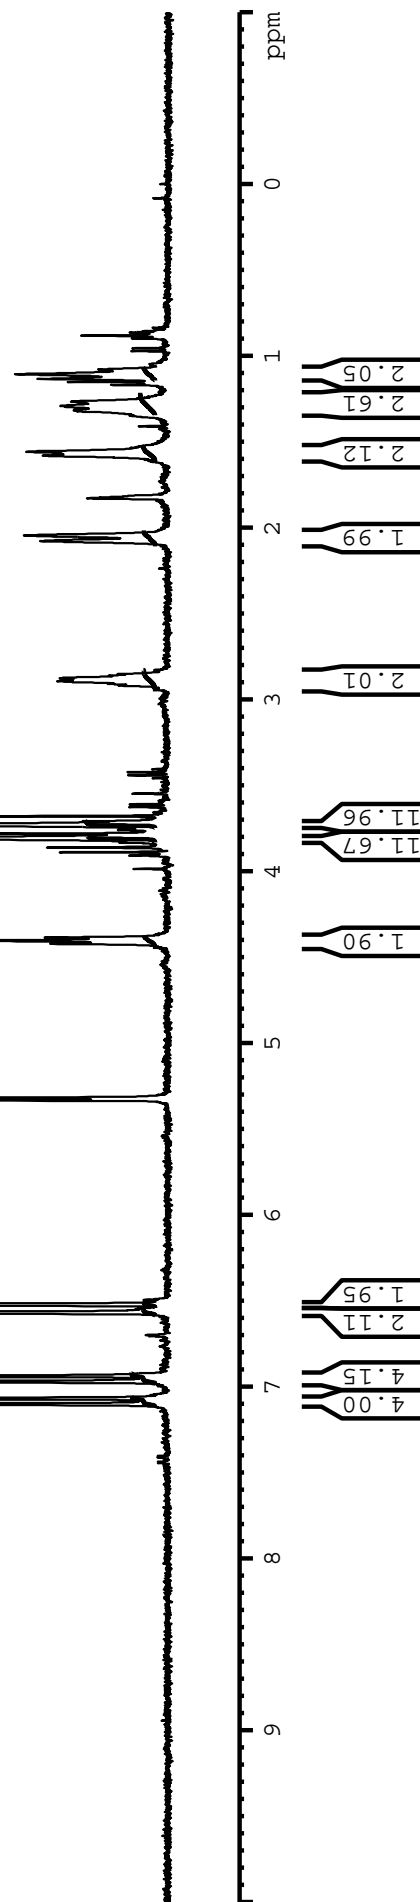



Supporting Information - Watson, Chiu and Bergman

1H starting parameters (zg30)  
 DRX-500 zBBO probe  
 =====

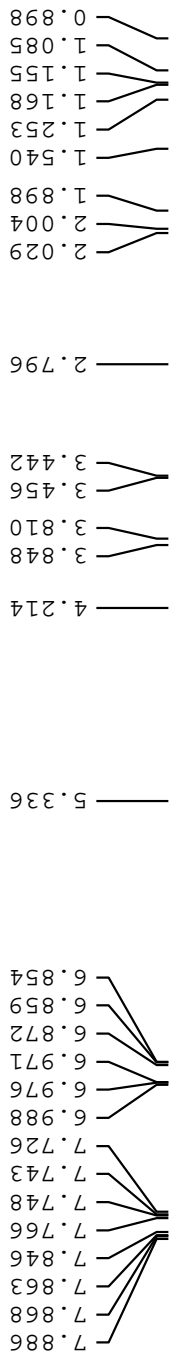

Current Data Parameters  
 NAME 3146H  
 EXPNO 1  
 PROCNO 1

F2 - Acquisition Parameters  
 Date\_ 20060606  
 Time\_ 20.48  
 INSTRUM DRX-500  
 PROBHD 5 mm BBO BB-IH  
 PULPROG zg30  
 TD 65536  
 SOLVENT CDCl3  
 NS 1  
 DS 0  
 SWH 10000.000 Hz  
 FIDRES 0.152588 Hz  
 AQ 3.2768500 sec  
 RG 322.5  
 DW 50.000 usec  
 DE 7.11 usec  
 TE 293.0 K  
 D1 1.0000000 sec  
 MCREST 0.0000000 sec  
 MCWRK 0.01500000 sec

==== CHANNEL f1 =====  
 NUC1 1H  
 P1 12.20 usec  
 PL1 -5.00 dB  
 SFO1 500.1330883 MHz

F2 - Processing parameters  
 SI 65536  
 SF 500.1300127 MHz  
 WDW EM  
 SSB 0  
 LR 0 20 Hz

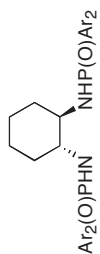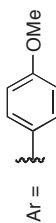

C<sub>34</sub>H<sub>40</sub>N<sub>2</sub>O<sub>6</sub>P<sub>2</sub>  
 Mol. Wt.: 634.64

**13e**

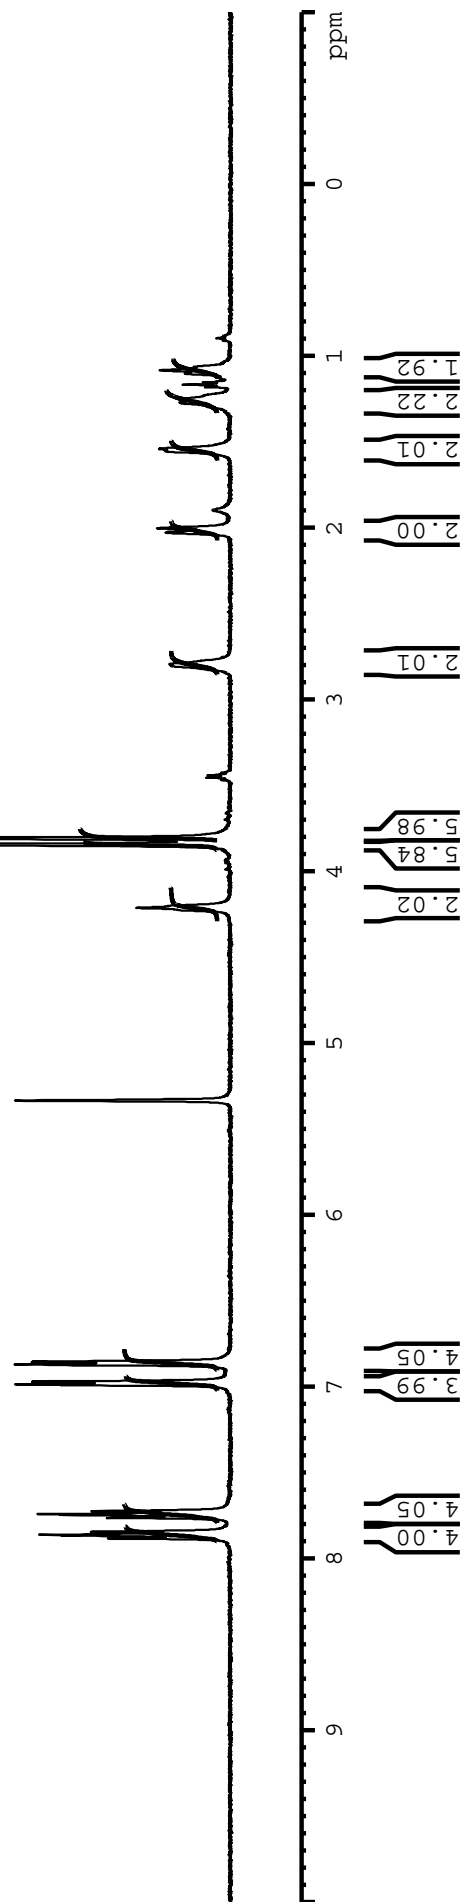

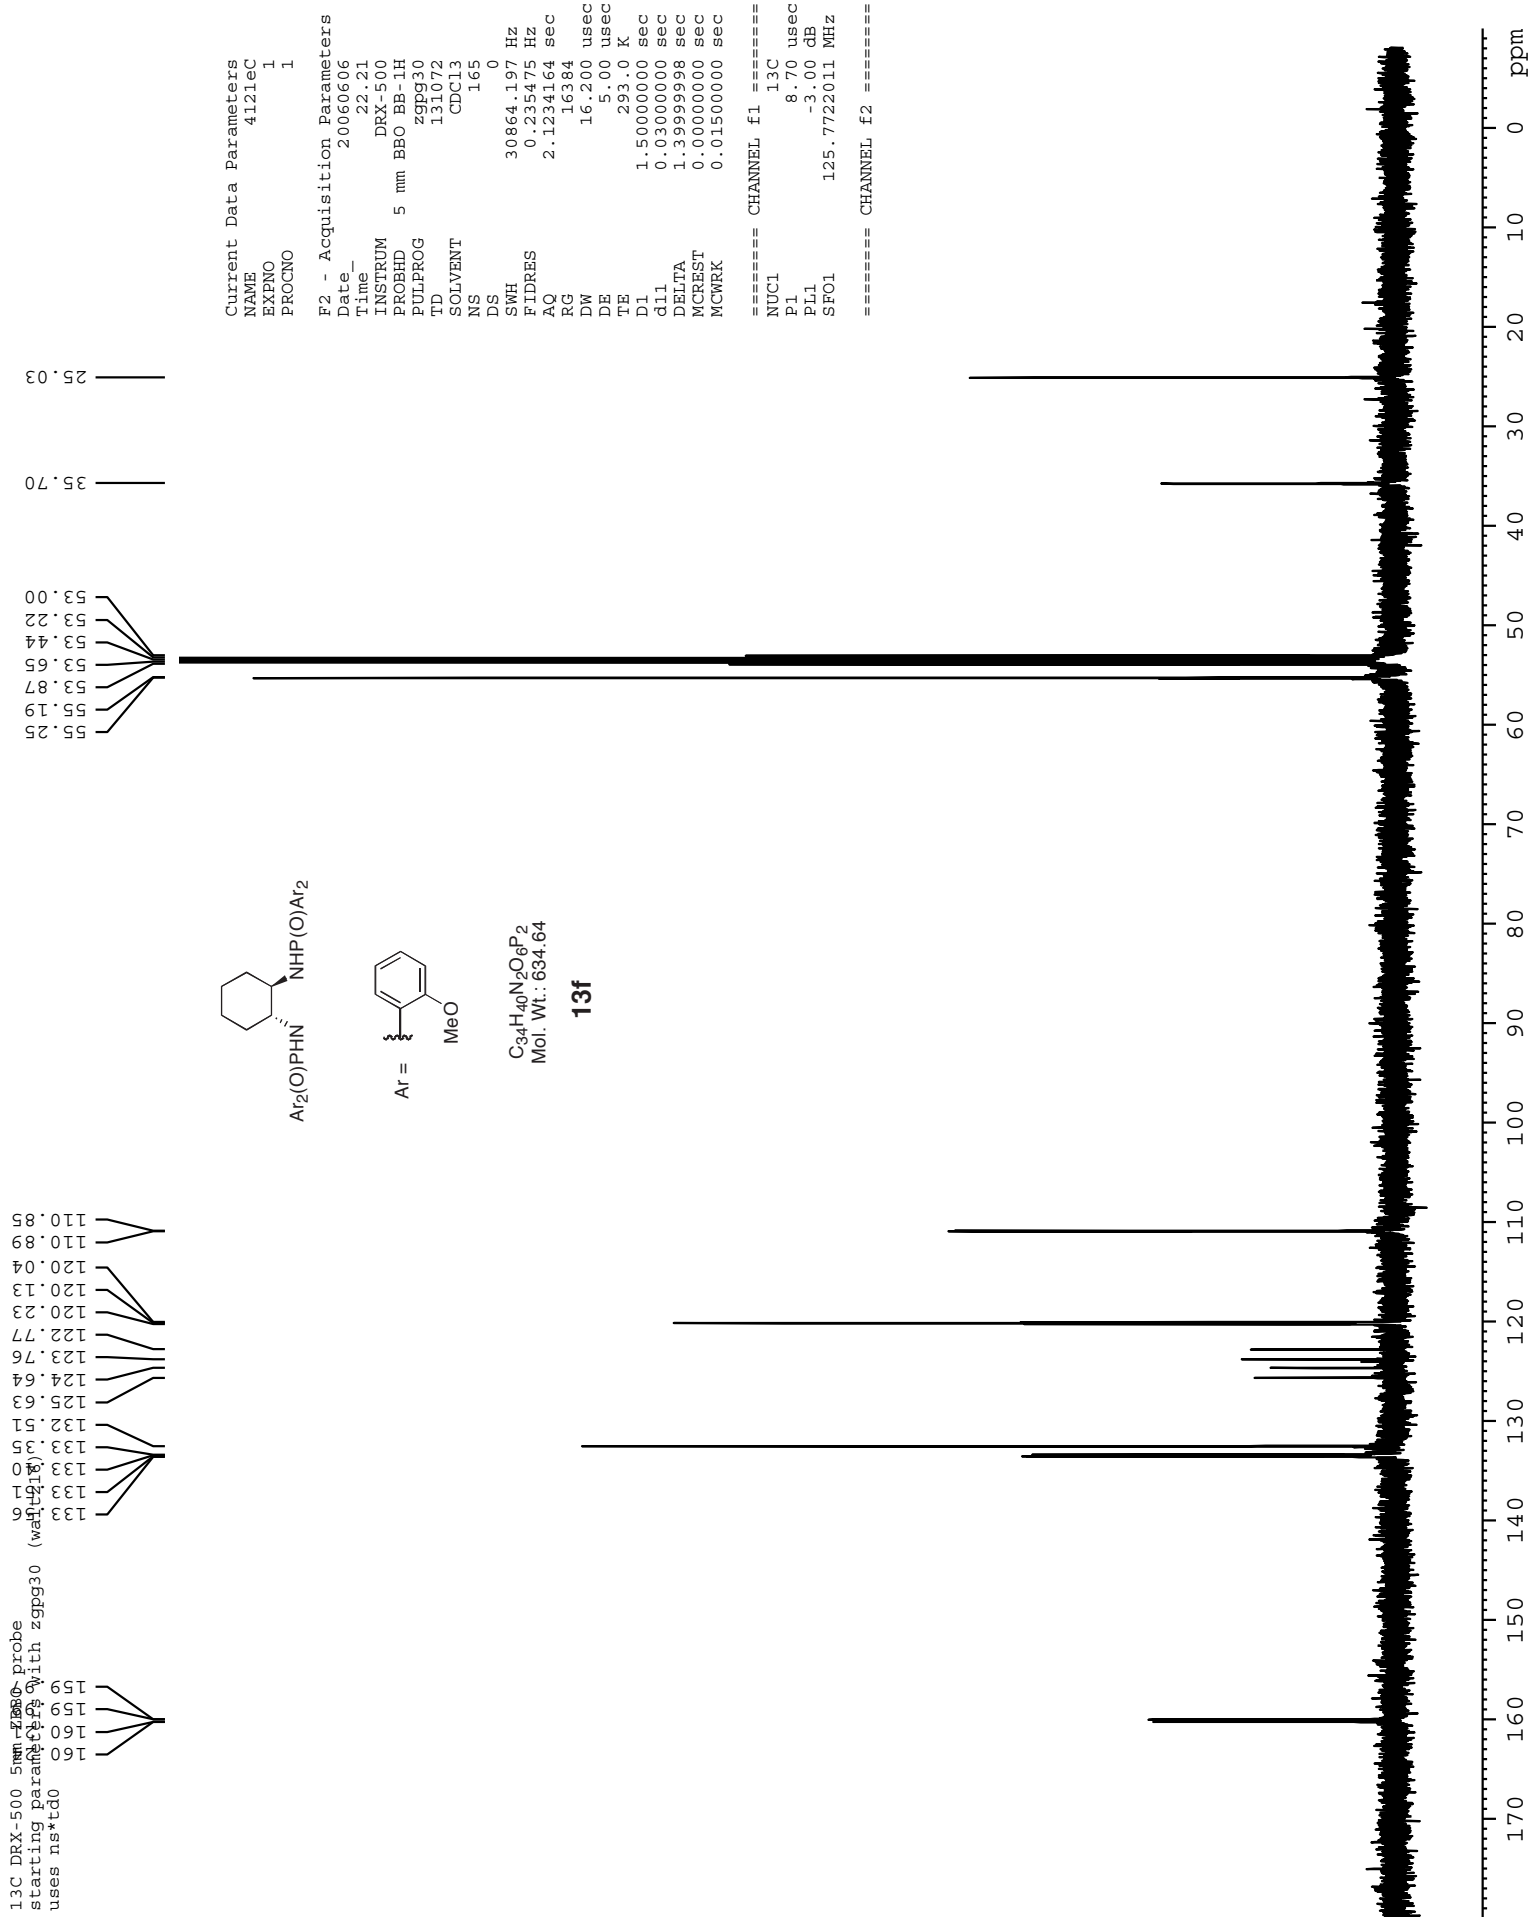

Supporting Information - Watson, Chiu and Bergman

1H starting parameters (zg30)

DRX-500 zBBO probe

=====

7.8888  
7.8888  
7.8733  
7.8600  
7.8455  
7.7844  
7.7699  
7.7566  
7.7411  
7.7436  
7.7421  
7.4066  
7.3833  
7.3688  
7.3522  
7.0422  
7.0288  
6.8322  
6.7555  
6.7399  
6.7288  
6.1033  
5.3488  
4.1155  
3.7277  
3.6077  
3.5244  
3.5022  
3.4788  
3.2166  
2.6399  
2.1344  
2.1222  
2.0411  
2.0211  
1.8844  
1.5722  
1.2444

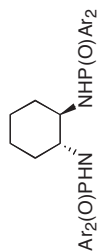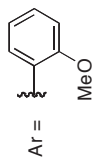

C<sub>34</sub>H<sub>40</sub>N<sub>2</sub>O<sub>6</sub>P<sub>2</sub>  
Mol. Wt.: 634.64

**13f**

Current Data Parameters  
NAME 4121eh  
EXPNO 1  
PROCNO 1

F2 - Acquisition Parameters  
Date\_ 20060606  
Time 22.19  
INSTRUM DRX-500  
PROBHD 5 mm BBO BB-IH  
PULPROG zg30  
TD 65536  
SOLVENT CDCl3  
NS 1  
DS 0  
SWH 10000.000 Hz  
FIDRES 0.152588 Hz  
AQ 3.2768500 sec  
RG 45.3  
DW 50.000 usec  
DE 7.11 usec  
TE 293.0 K  
D1 1.0000000 sec  
MCREST 0.0000000 sec  
MCWRK 0.01500000 sec

==== CHANNEL f1 =====  
NUC1 1H  
P1 12.20 usec  
PL1 -5.00 dB  
SFO1 500.1330883 MHz

F2 - Processing parameters  
SI 65536  
SF 500.1300127 MHz  
WDW EM  
SSB 0  
LR 0.20 Hz

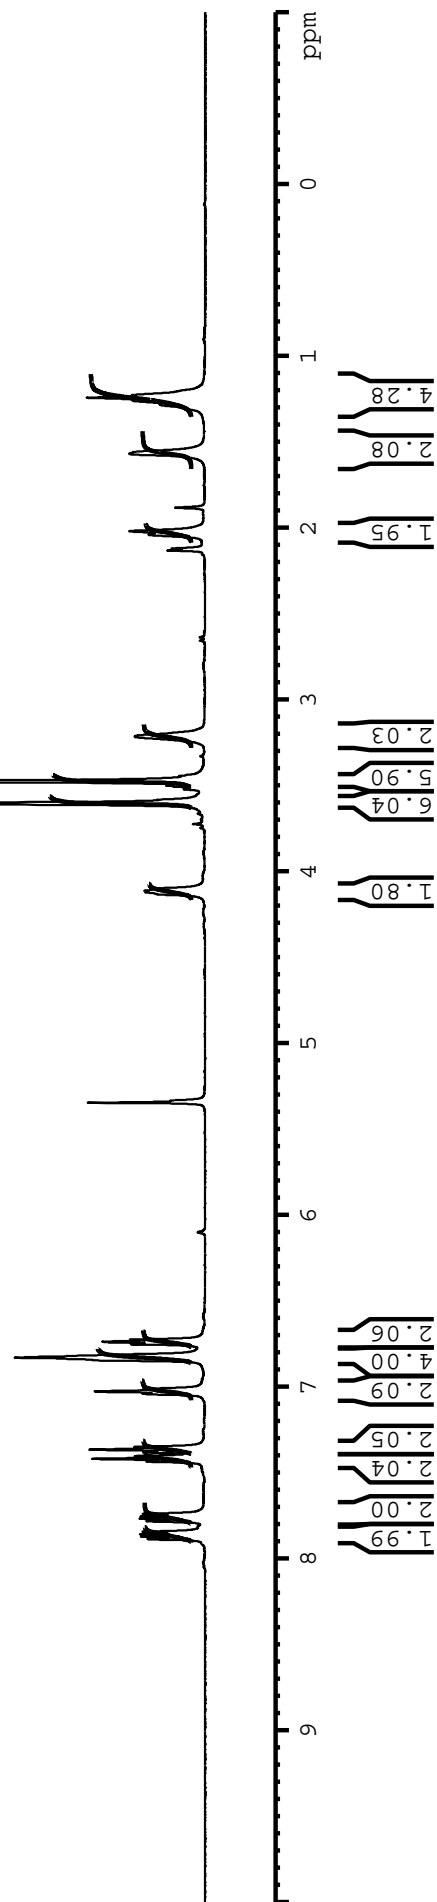



Supporting Information - Watson, Chiu and Bergman

Current Data Parameters  
 NAME 3112AH  
 EXPNO 1  
 PROCNO 1  
 DU /u  
 USER DAW

F2 - Acquisition Parameters  
 Date\_ 20060206  
 Time 14.19  
 INSTRUM AVB-400  
 PROBHD 5 mm PABBO BB-  
 PULPROG zg30  
 TD 65536  
 SOLVENT CDCl3  
 NS 8  
 DS 0  
 SWH 8278.146 Hz  
 FIDRES 0.126314 Hz  
 AQ 3.9584243 sec  
 RG 322.5  
 DW 60.400 usec  
 DE 6.00 usec  
 TE 294.6 K  
 DL 1.0000000 sec  
 MCREST 0.0000000 sec  
 MCVRK 0.0150000 sec

==== CHANNEL f1 =====  
 NUC1 1H  
 P1 8.20 usec  
 PL1 -3.00 dB  
 SFO1 400.1324710 MHz

F2 - Processing parameters  
 SI 32768  
 SF 400.1300000 MHz  
 WTMW RM

7.648  
7.617  
7.563  
7.485  
7.455  
7.367  
7.333  
7.304  
7.226  
7.147  
7.098

4.323

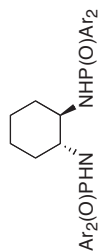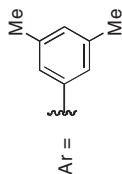

C<sub>38</sub>H<sub>48</sub>N<sub>2</sub>O<sub>2</sub>P<sub>2</sub>  
 Mol. Wt.: 626.75

13g

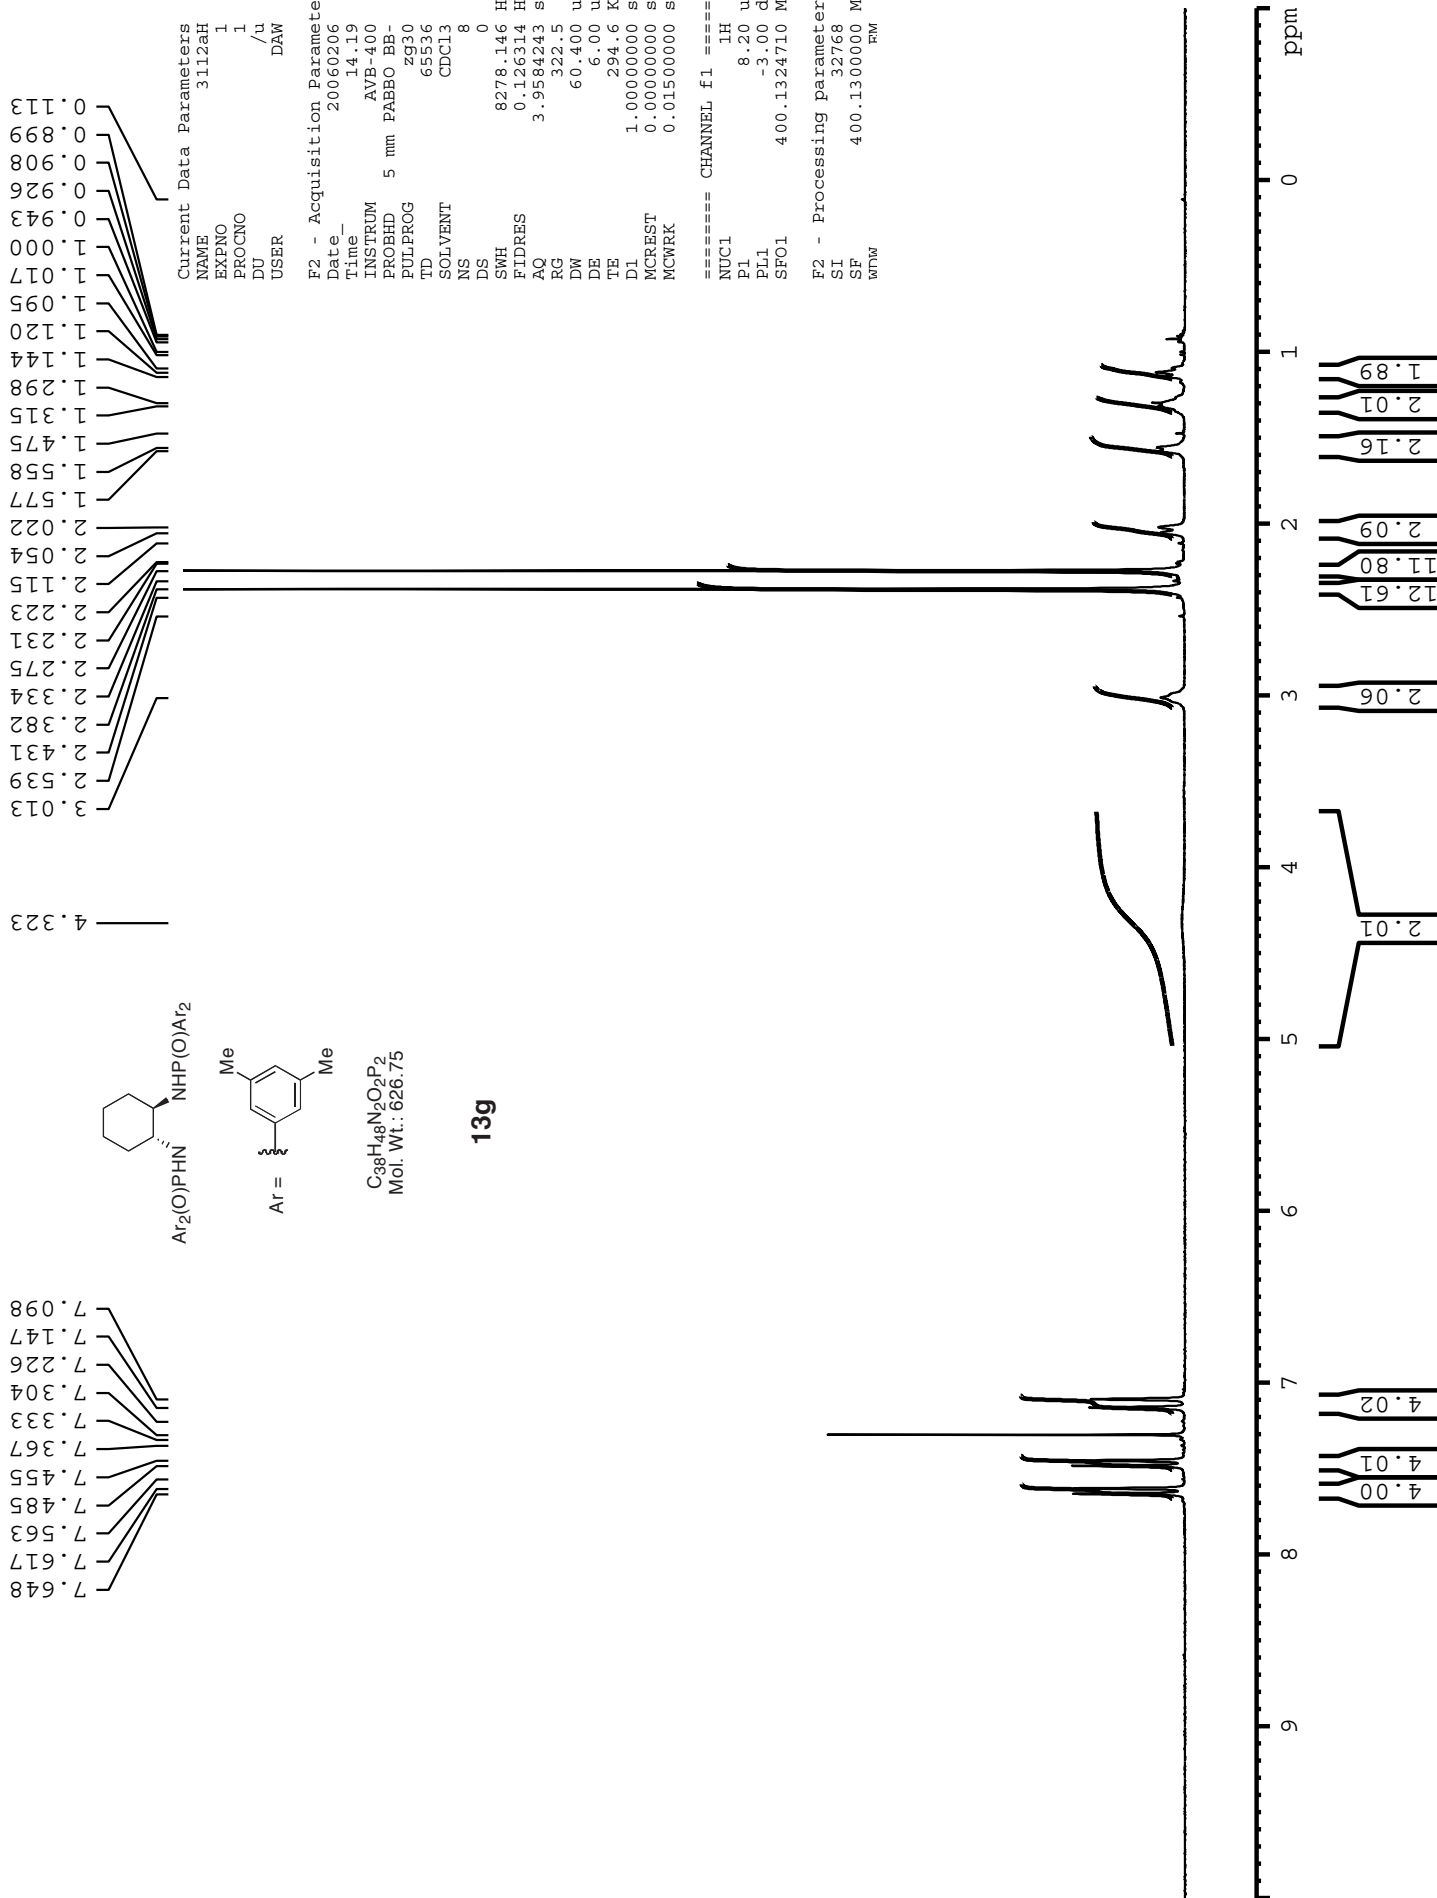

13C DRX-500 5mm ZBBO probe  
 starting parameters with zgpg30 (waltz16)  
 uses ns\*td0

130.0  
 128.0  
 129.0  
 128.0  
 96.0

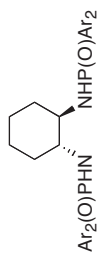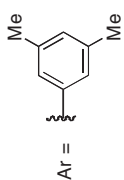

C<sub>38</sub>H<sub>48</sub>N<sub>2</sub>O<sub>2</sub>P<sub>2</sub>  
 Mol. Wt.: 626.75

**13g**

Current Data Parameters  
 USER DAW  
 NAME 3112aC  
 EXPNO 2  
 PROCNO 1

F2 - Acquisition Parameters  
 Date\_ 20060213  
 Time\_ 21.36  
 INSTRUM DRX-500  
 PROBED 5 mm BBO BB-IH  
 PULPROG zgpg30  
 TD 131072  
 SOLVENT CDCl<sub>3</sub>  
 NS 10000  
 DS 0  
 SWH 30864.197 Hz  
 FIDRES 0.235475 Hz  
 AQ 2.1234164 sec  
 RG 16384  
 DW 16.200 usec  
 DE 5.00 usec  
 TE 293.0 K  
 D1 1.5000000 sec  
 d11 0.0300000 sec  
 DELTA 1.3999998 sec  
 MCREST 0.0000000 sec  
 MCMRK 0.015000000 sec

==== CHANNEL f1 =====  
 NUC1 13C  
 P1 8.70 usec  
 PL1 -3.00 dB  
 SFO1 125.7722011 MHz

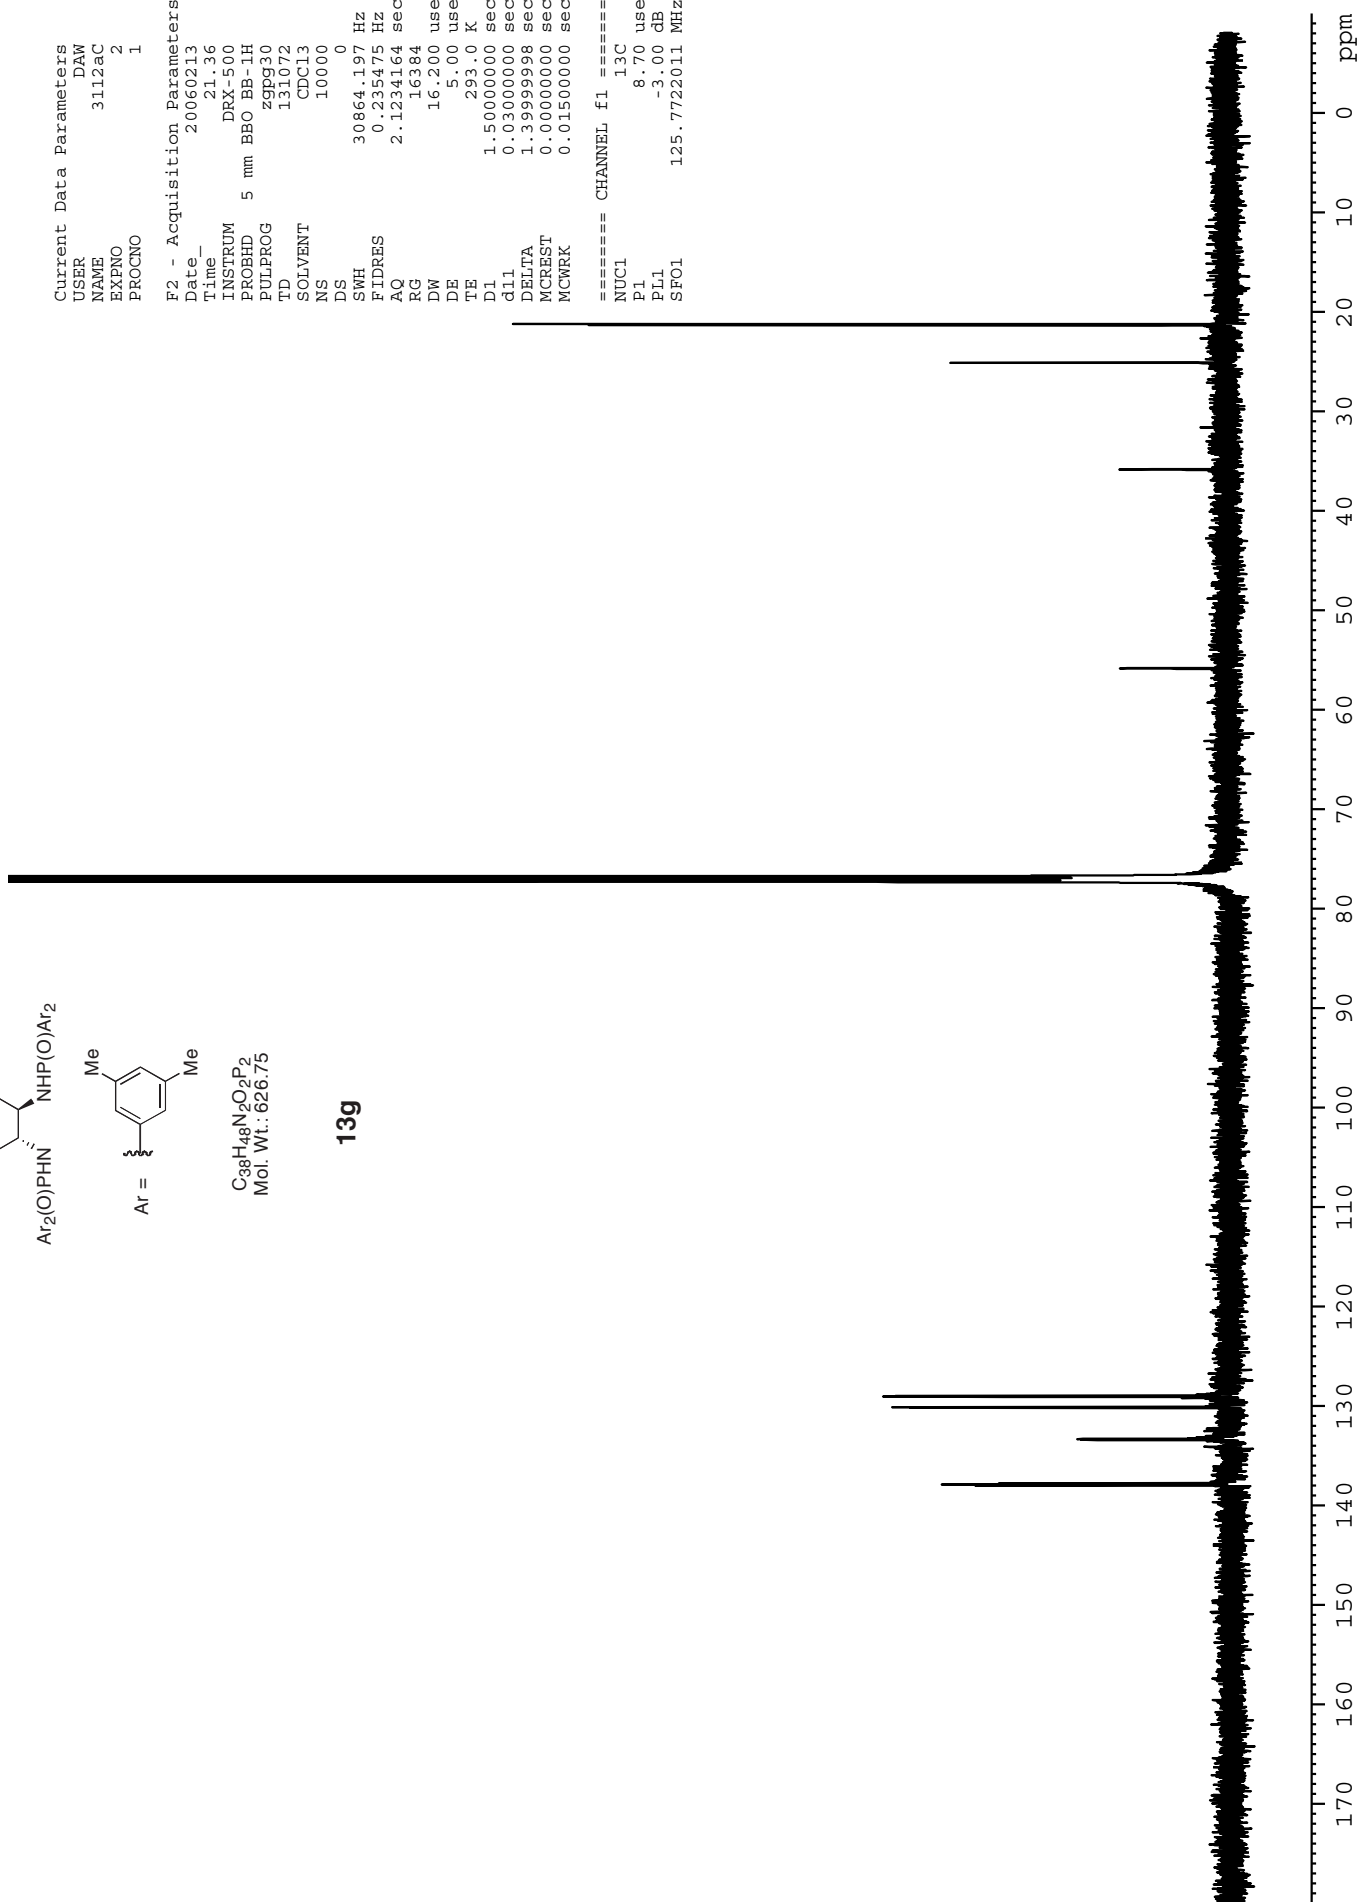



Supporting Information - Watson, Chiu and Bergman

S52

1H starting parameters (zg30)  
 DRX-500 zBBO probe

7.877  
7.851  
7.780  
7.755  
7.573  
7.553

5.335  
4.429

2.873

2.150  
2.125  
2.023  
1.539  
1.484  
1.361  
1.286  
1.158  
1.083  
0.992  
0.979  
0.904

Current Data Parameters  
 NAME 4015aH  
 EXPNO 1  
 PROCNO 1

F2 - Acquisition Parameters  
 Date\_ 20060606  
 Time\_ 20.03  
 INSTRUM DRX-500  
 PROBHD 5 mm BBO BB-IH  
 PULPROG zg30  
 TD 65536  
 SOLVENT CDCl3  
 NS 9  
 DS 0  
 SWH 10000.000 Hz  
 FIDRES 0.152588 Hz  
 AQ 3.2768500 sec  
 RG 128  
 DW 50.000 usec  
 DE 7.11 usec  
 TE 293.0 K  
 D1 1.0000000 sec  
 MCREST 0.0000000 sec  
 MCWRK 0.01500000 sec

==== CHANNEL f1 =====  
 NUC1 1H  
 P1 12.20 usec  
 PL1 -5.00 dB  
 SFO1 500.1330883 MHz

F2 - Processing parameters  
 SI 65536  
 SF 500.1300127 MHz  
 WDW EM  
 SSB 0  
 LB 0.20 Hz

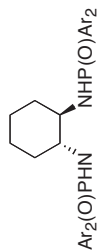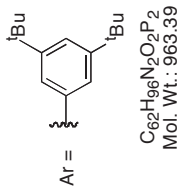

13h

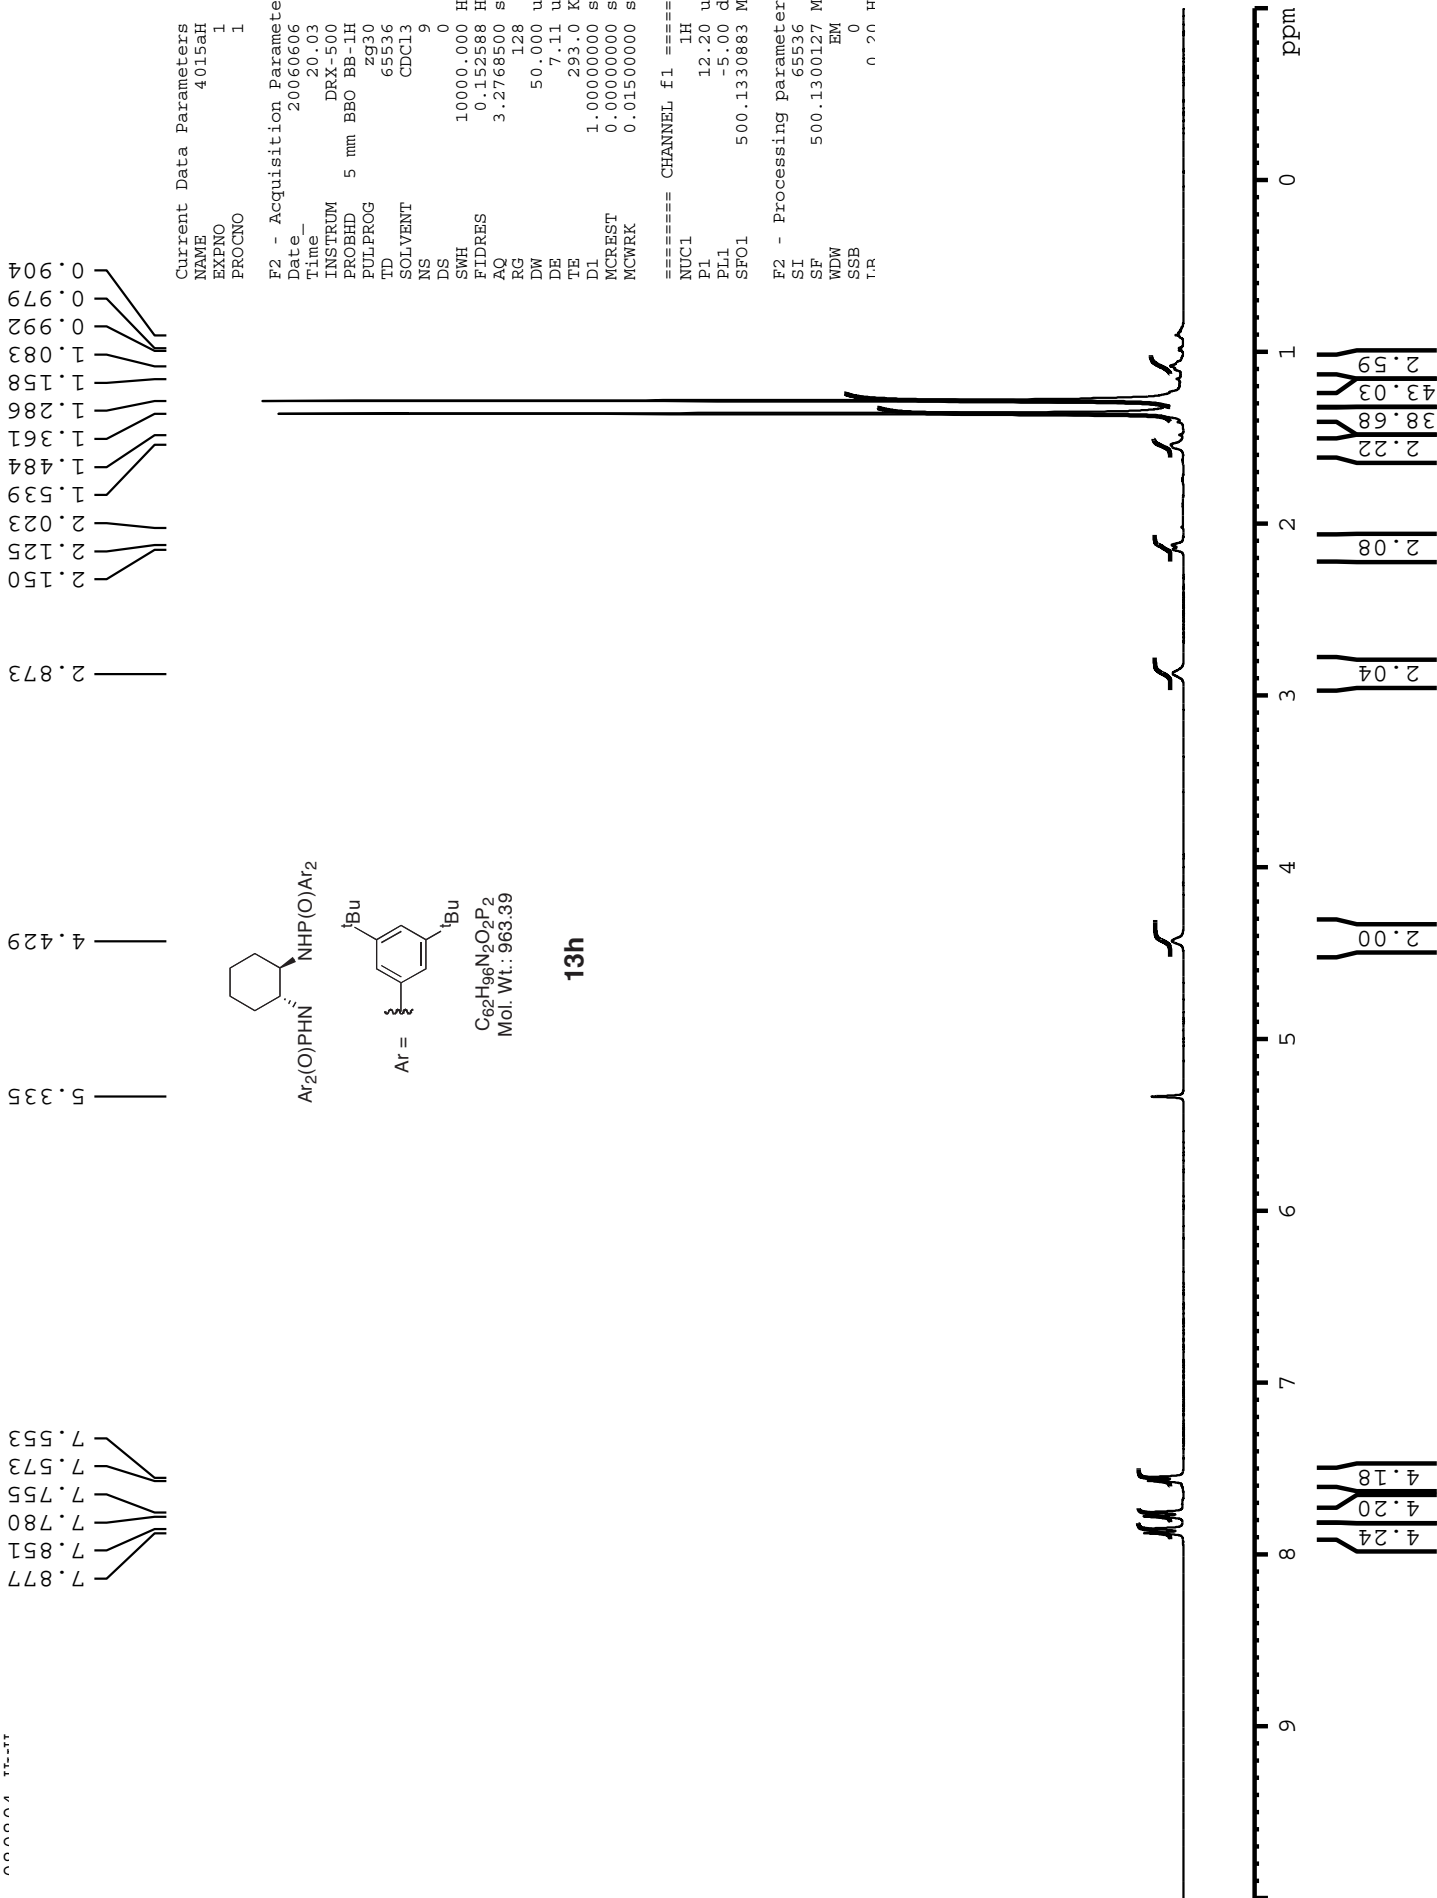

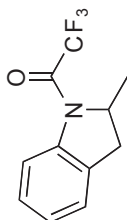

**C<sub>11</sub>H<sub>10</sub>F<sub>3</sub>NO**  
**Mol. Wt.: 229.20**

**18**

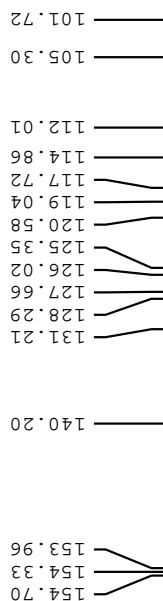

AVQ-400 QNP Carbon Starting parameters 7/16/03 revised 7

Current Data Parameters  
 NAME mc3p039pdt  
 EXPNO 13  
 PROCNO 1

F2 - Acquisition Parameters  
 Date\_ 20060707  
 Time 18.44  
 INSTRUM AVQ-400  
 PROBD 5 mm QNP 1H/13  
 PULPROG zgpg30  
 TD 65536  
 SOLVENT CDCl3  
 NS 77  
 DS 0  
 SWH 24038.461 Hz  
 FIDRES 0.366798 Hz  
 AQ 1.3631988 sec  
 RG 25.4  
 DW 20.800 usec  
 DE 6.00 usec  
 TE 293.0 K  
 D1 2.0000000 sec  
 d11 0.03000000 sec  
 DELTA 1.89999998 sec  
 MCREST 0.0000000 sec  
 MCWRK 0.01500000 sec

==== CHANNEL f1 =====  
 NUC1 13C  
 P1 8.50 usec  
 PL1 -2.00 dB  
 SFO1 100.6228298 MHz

==== CHANNEL f2 =====

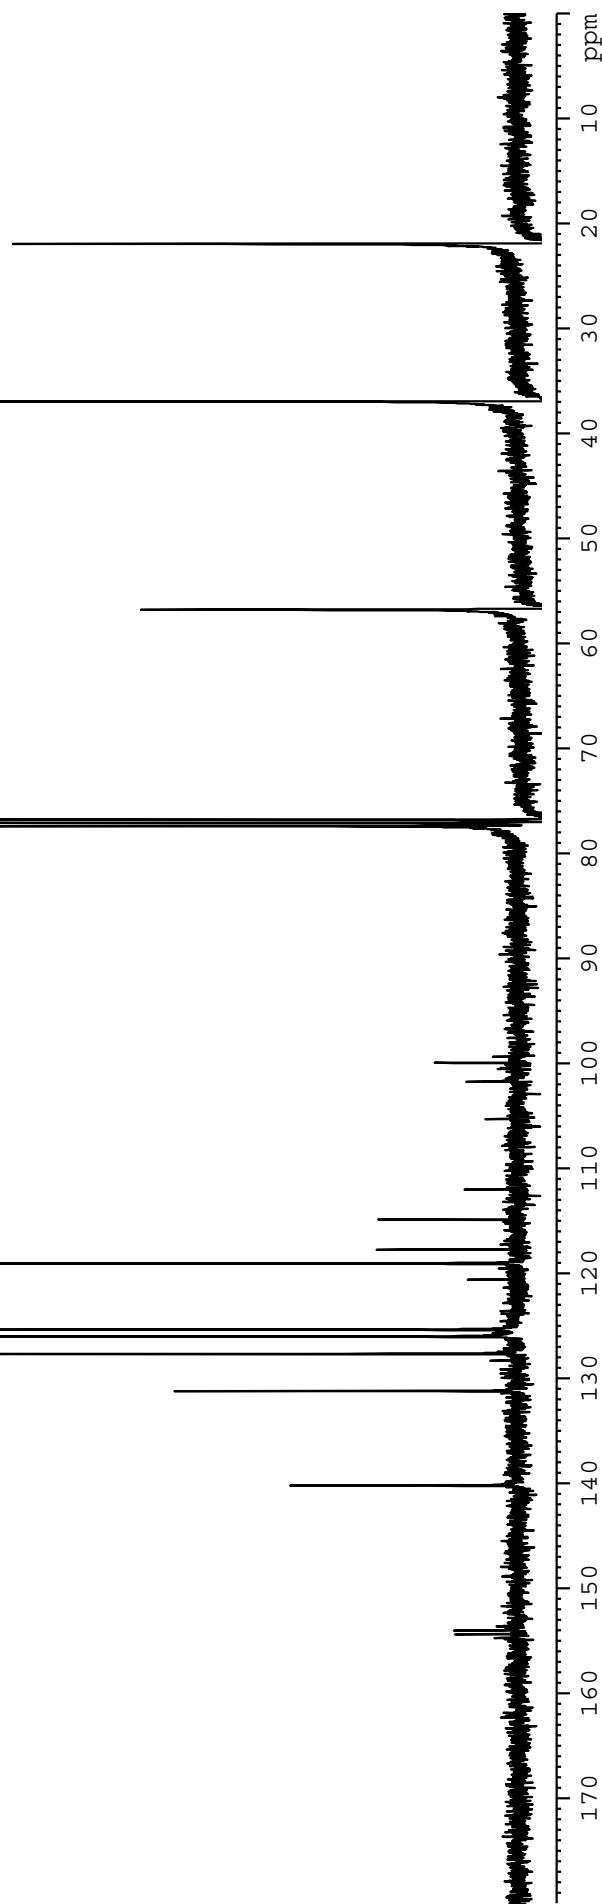

Supporting Information - Watson, Chiu and Bergman

0.043  
8.023  
7.384  
7.260  
7.205  
7.187  
7.167  
7.098  
7.079  
7.061  
4.751  
4.734  
4.717  
4.700  
4.684  
3.397  
3.365  
3.345  
3.326  
3.307  
2.650  
2.611  
2.257  
1.949  
1.724  
1.403  
1.387  
1.246  
1.230  
1.137  
1.120  
1.102  
1.084  
1.068  
0.797

Current Data Parameters  
NAME mc3p039pdt  
EXPNO 1  
PROCNO 1

F2 - Acquisition Parameters  
Date\_ 20060707  
Time 18.41  
INSTRUM AVQ-400  
PROBHD 5 mm QNP 1H/13  
PULPROG zg30  
TD 65536  
SOLVENT CDCl3  
NS 8  
DS 0  
SWH 8012.820 Hz  
FIDRES 0.122266 Hz  
AQ 4.0894966 sec  
RG 45.3  
DW 62.400 use  
DE 6.00 use  
TE 292.7 K  
D1 1.0000000 sec  
MCREST 0.0000000 sec  
MCWRK 0.01500000 sec

==== CHANNEL f1 =====  
NUC1 1H  
P1 14.40 use  
PL1 0.00 dB  
SFO1 400.1324700 MHz

F2 - Processing parameters  
SI 65536  
SF 400.1300539 MHz  
WDW EM  
SSB 0  
LR 0 20 Hz

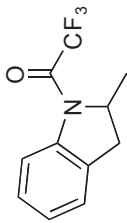

C<sub>11</sub>H<sub>10</sub>F<sub>3</sub>NO  
Mol. Wt.: 229.20

18

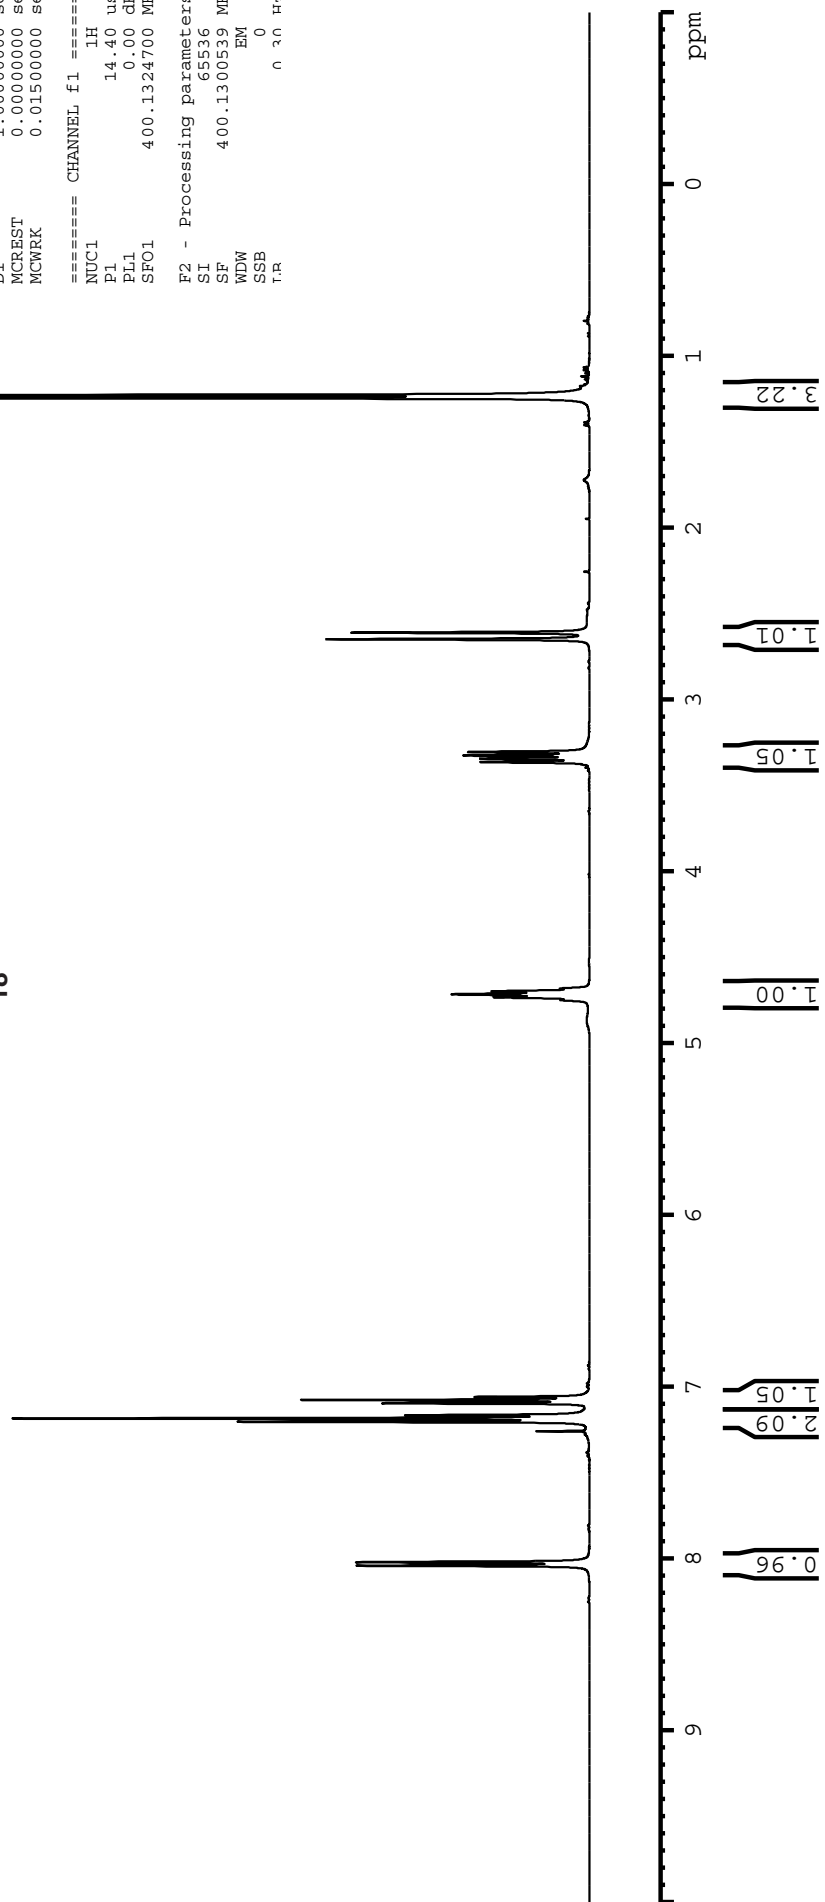

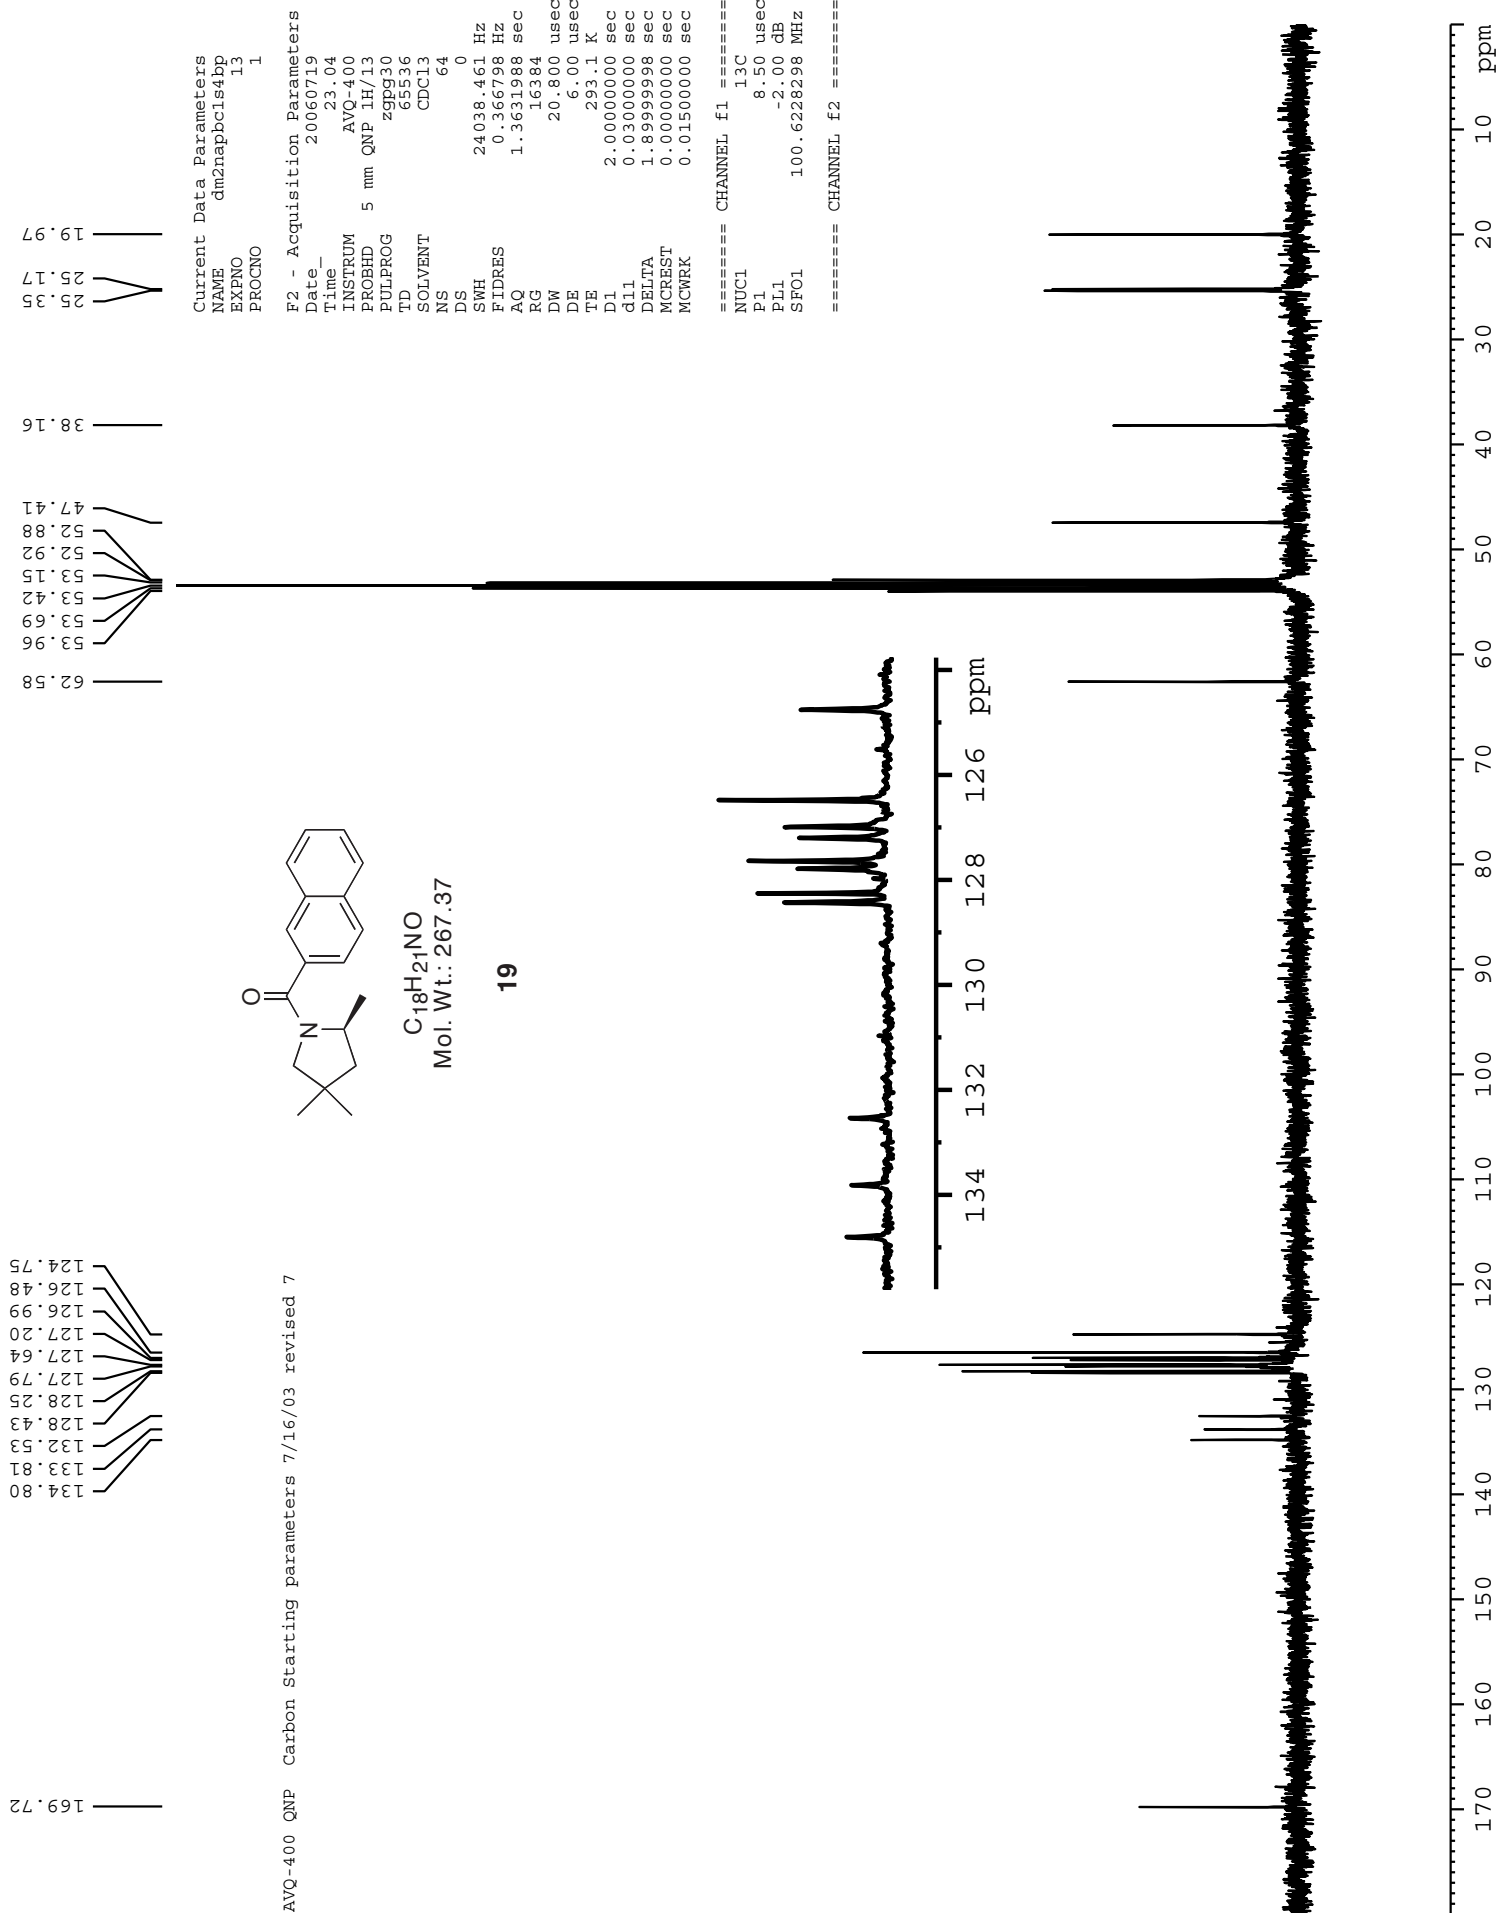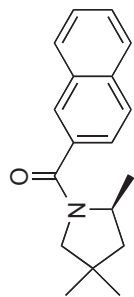

C<sub>18</sub>H<sub>21</sub>NO  
 Mol. Wt.: 267.37

19

AVO-400 QNP Carbon Starting parameters 7/16/03 revised 7

Supporting Information - Watson, Chiu and Bergman

7.934  
7.920  
7.908  
7.908  
7.894  
7.885  
7.819  
7.706  
7.682  
7.644  
7.623  
7.595  
7.592  
7.584  
7.578  
7.567  
7.564  
7.561  
7.553  
7.546  
7.543  
7.541  
7.529  
7.524  
7.524  
7.370  
5.324  
5.322  
5.319  
4.426  
4.411  
4.394  
4.387  
4.378  
4.371  
4.354  
4.339  
4.181  
3.754  
3.551  
3.405  
3.379  
3.252  
3.202  
3.157  
3.131  
2.935  
2.005  
2.001  
1.987  
1.982  
1.974  
1.969  
1.955  
1.951  
1.815  
1.594  
1.578  
1.496  
1.472  
1.465  
1.438  
1.422  
1.344  
1.289  
1.277  
1.262  
1.199

Current Data Parameters  
 NAME dm2napbcis4bp  
 EXPNO 1  
 PROCNO 1

F2 - Acquisition Parameters  
 Date\_ 20060719  
 Time 23.00  
 INSTRUM AVQ-400  
 PROBHD 5 mm QNP 1H/13  
 PULPROG zg30  
 TD 65536  
 SOLVENT CD2Cl2  
 NS 8  
 DS 0  
 SWH 8012.820 Hz  
 FIDRES 0.122266 Hz  
 AQ 4.0894966 sec  
 RG 50.8  
 DE 62.400 use  
 TE 292.9 K  
 D1 1.0000000 sec  
 MCREST 0.0000000 sec  
 MCWRK 0.01500000 sec

==== CHANNEL f1 =====  
 NUC1 1H  
 P1 14.40 use  
 PL1 0.00 dB  
 SFO1 400.1324700 MHz

F2 - Processing parameters  
 SI 65536  
 SF 400.1300142 MHz  
 WDW EM  
 SSB 0  
 T.R 0 30 Hz

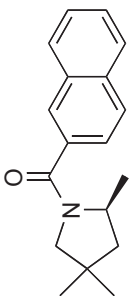

C<sub>18</sub>H<sub>21</sub>NO  
 Mol. Wt.: 267.37

19

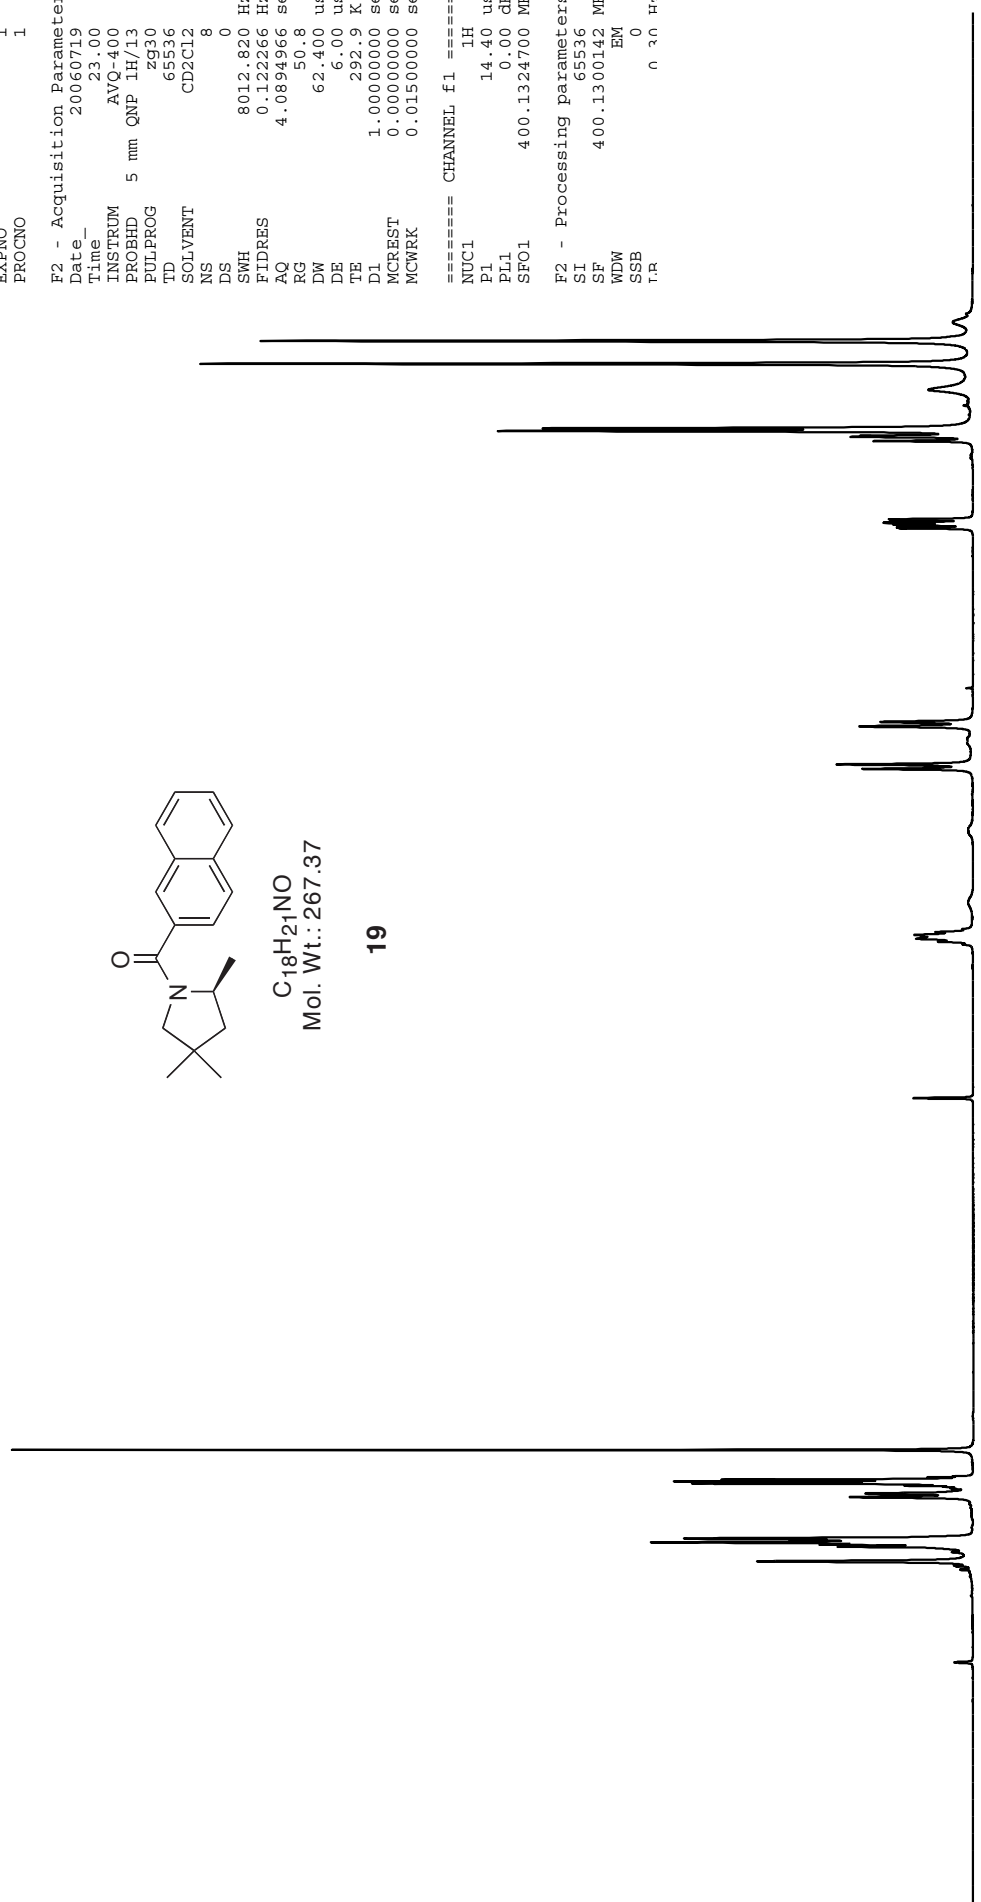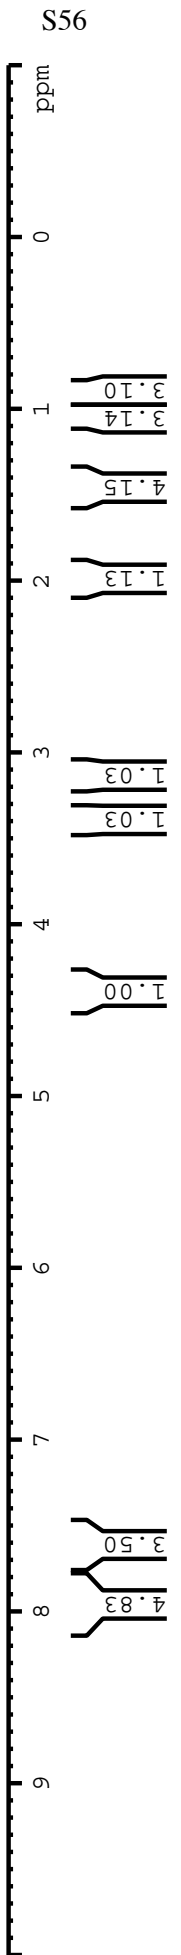



Supporting Information - Watson, Chiu and Bergman

S57

13C DRX-500 5mm ZBBO probe  
 starting parameters with zgpg30 (waltz16)  
 uses ns\*td0  
 012504 HH

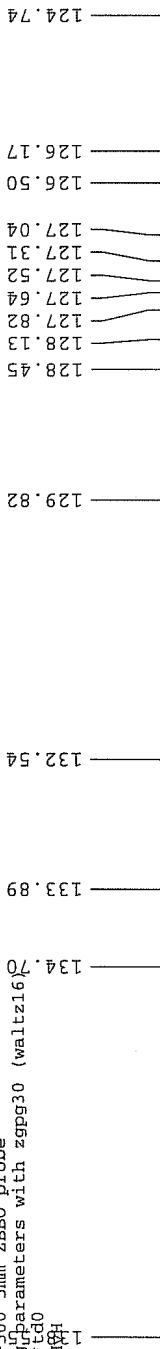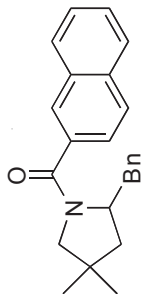

C<sub>24</sub>H<sub>25</sub>NO  
 Mol. Wt.: 343.46

20

Current Data Parameters  
 NAME bn2nabc2s3bp3  
 EXPNO 13  
 PROCNO 1  
 DU /u  
 USER labrat

F2 - Acquisition Parameters  
 Date\_ 20060722  
 Time 16.28  
 INSTRUM DRX-500  
 PROBHD 5 mm BBO BB-LH  
 PULPROG zgpg30  
 TD 131072  
 SOLVENT CDCl3  
 NS 608  
 DS 0  
 SMH 30864.197 Hz  
 FIDRES 0.235475 Hz  
 AQ 2.1234164 sec  
 RG 16384  
 DW 16.200 usec  
 DE 5.00 usec  
 TE 293.0 K  
 D1 1.5000000 sec  
 d11 0.0300000 sec  
 DELTA 1.3999998 sec  
 MCREST 0.0000000 sec  
 MCWRK 0.0150000 sec

==== CHANNEL f1 =====  
 NUC1 13C  
 P1 8.70 usec  
 PL1 -3.00 dB  
 SF01 125.7722011 MHz

==== CHANNEL f2 =====  
 CPDPRG2 waltz16  
 NUC2 1H  
 PCPD2 97.00 usec  
 PL2 -5.00 dB  
 PL12 15.50 dB  
 PL13 21.50 dB  
 SF02 500.1321560 MHz

F2 - Processing parameters  
 SI 131072  
 SF 125.7577971 MHz  
 WDW EM  
 SSB 0  
 LB 0.75 Hz  
 GB 0  
 PC 4.00

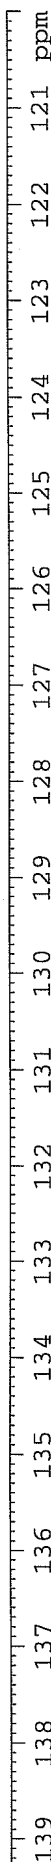

Supporting Information - Watson, Chiu and Bergman

13C DRX-500 5mm ZBBO probe  
 starting parameters with zgpg30 (waltz16)  
 uses ns\*td0  
 012504 HvH

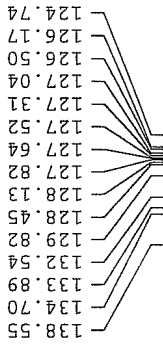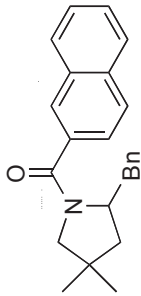

C<sub>24</sub>H<sub>25</sub>NO  
 Mol. Wt.: 343.46

20

Current Data Parameters  
 NAME: C bn2nbc23bp3  
 EXPNO: 13  
 PROCNO: 1  
 DU: /u  
 USER: labrat

F2 - Acquisition Parameters

Date\_ 20060722  
 Time 16.28  
 INSTRUM DRX-500  
 PROBHD 5 mm BBO BB-1H  
 PULPROG zgpg30  
 TD 131072  
 SOLVENT CDCl3  
 NS 592  
 DS 0  
 SWH 30864.197 Hz  
 FIDRES 0.235475 Hz  
 AQ 2.1234164 sec  
 RG 16384  
 DE 16.200 usec  
 TE 293.0 K  
 D1 1.5000000 sec  
 d11 0.0300000 sec  
 DELTA 1.3999998 sec  
 MCREST 0.0000000 sec  
 MCWRK 0.0150000 sec

==== CHANNEL f1 =====  
 NUC1 13C  
 P1 8.70 usec  
 PL1 -3.00 dB  
 SFO1 125.7722011 MHz

==== CHANNEL f2 =====  
 CPDPRG2 waltz16  
 NUC2 1H  
 PCPD2 97.00 usec  
 PL2 -5.00 dB  
 PL12 15.50 dB  
 PL13 21.50 dB  
 SFO2 500.1321560 MHz

F2 - Processing parameters  
 SI 131072  
 SF 125.7577971 MHz  
 WDM EM  
 SSB 0  
 LB 0.75 Hz  
 GB 0  
 PC 4.00

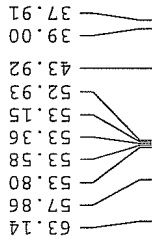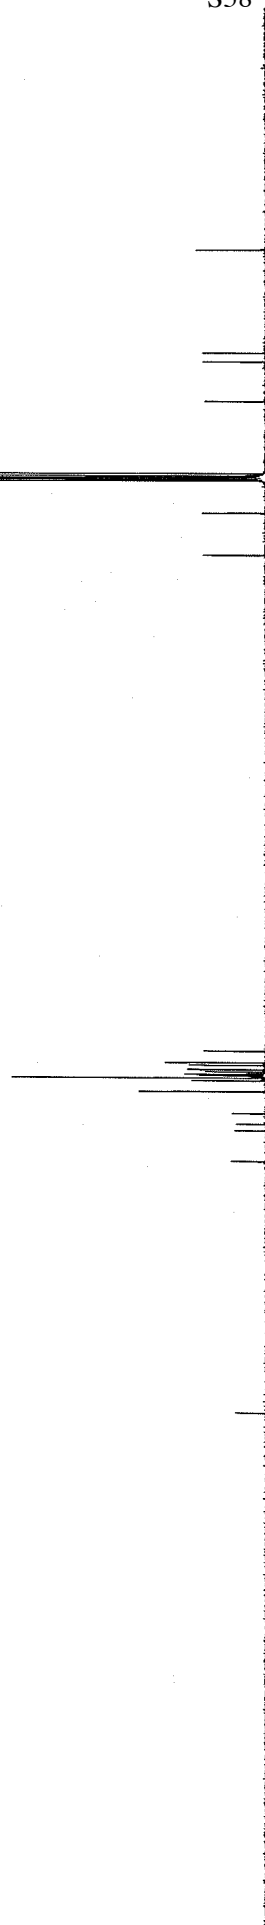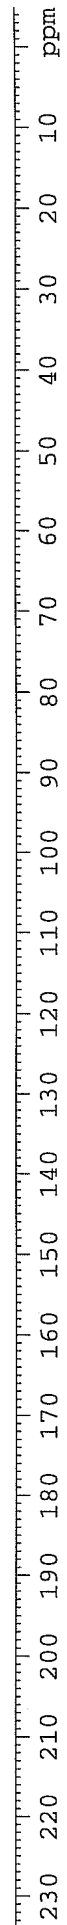

Supporting Information - Watson, Chiu and Bergman

8.116  
7.993  
7.811  
7.790  
7.644  
7.614  
7.593  
7.572  
7.318  
7.301  
7.266  
7.253  
7.248  
7.239  
7.229  
7.224  
7.211  
7.197  
7.179  
7.150  
7.124  
6.954  
4.759  
4.740  
3.491  
3.461  
3.061  
3.039  
3.009  
2.934  
2.909  
2.804  
2.779  
1.966  
1.415  
1.382  
1.372  
1.365  
1.349  
1.317  
1.264  
1.227  
0.979  
0.960  
0.933  
0.891  
0.791  
0.737  
0.564  
0.543

Current Data Parameters  
 NAME bn2napc2s3bp2  
 EXPNO 1  
 PROCNO 1

F2 - Acquisition Parameters  
 Date\_ 20060722  
 Time 14.17  
 INSTRUM AVQ-400  
 PROBHD 5 mm QNP 1H/13  
 PULPROG zg30  
 TD 65536  
 SOLVENT C6D6  
 NS 8  
 DS 0  
 SWH 8012.820 Hz  
 FIDRES 0.122266 Hz  
 AQ 4.0894966 sec  
 RG 128  
 DW 62.400 use  
 DE 6.00 use  
 TE 294.3 K  
 D1 1.0000000 sec  
 MCREST 0.0000000 sec  
 MCWRK 0.01500000 sec

==== CHANNEL f1 =====  
 NUC1 1H  
 P1 14.40 use  
 PL1 0.00 dB  
 SFO1 400.1324700 MHz

F2 - Processing parameters  
 FI 65536  
 SF 400.1300461 MHz  
 TDW EM  
 ASB 0  
 IR 0 2x Hz

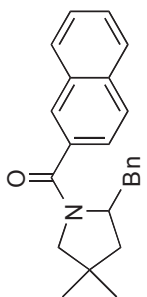

C<sub>24</sub>H<sub>25</sub>NO  
 Mol. Wt.: 343.46

20

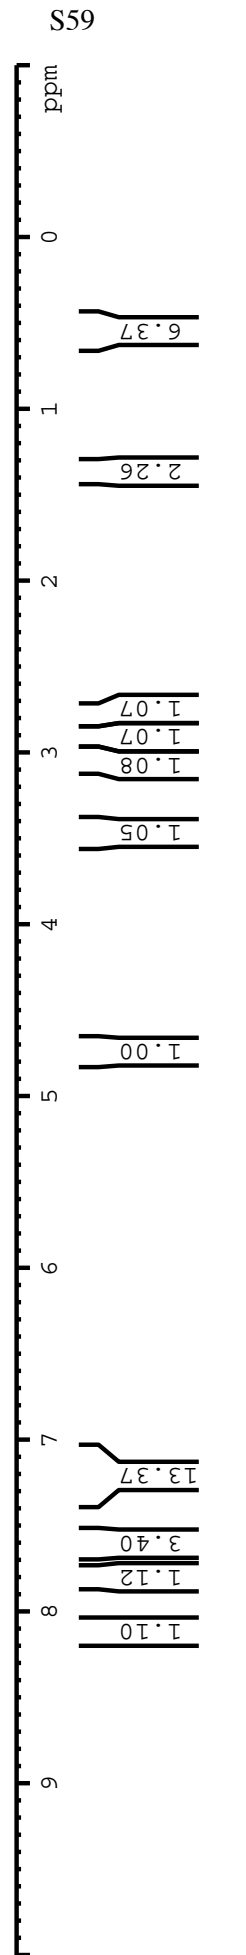

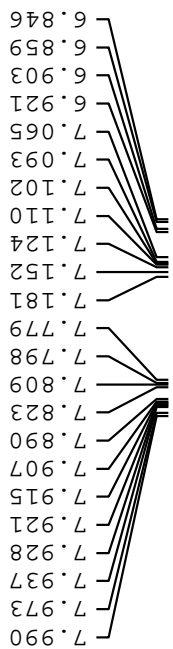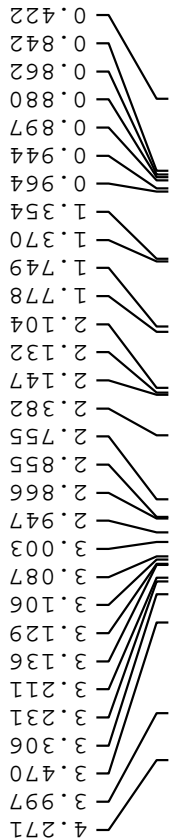

Current Data Parameters  
 USER DAW  
 NAME 3170aH13515m  
 EXPNO 1  
 PROCNO 1

F2 - Acquisition Parameters  
 Date\_ 20060214  
 Time 14.09  
 INSTRUM AVB-400  
 PROBHD 5 mm PABBO BB-  
 PULPROG zg30  
 TD 65536  
 SOLVENT CDCl3  
 NS 1  
 DS 0  
 SWH 8278.146 Hz  
 FIDRES 0.126314 Hz  
 AQ 3.9584243 sec  
 RG 203.2  
 DW 60.400 use  
 DE 6.00 use  
 TE 295.5 K  
 D1 1.0000000 sec  
 MCREST 0.0000000 sec  
 MCWRK 0.01500000 sec

==== CHANNEL f1 =====  
 NUC1 1H  
 P1 8.20 use  
 PL1 -3.00 dB  
 SFO1 400.1324710 MHz  
 F2 - Processing parameters  
 SI 32768  
 SF 400.1300000 MHz  
 WDW EM  
 SSR n

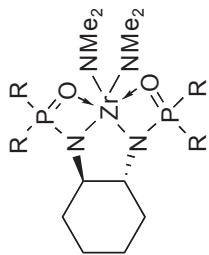

**20a** R = Ph  
 Generated In Situ  
 Contains Traces of 21a

**20a**

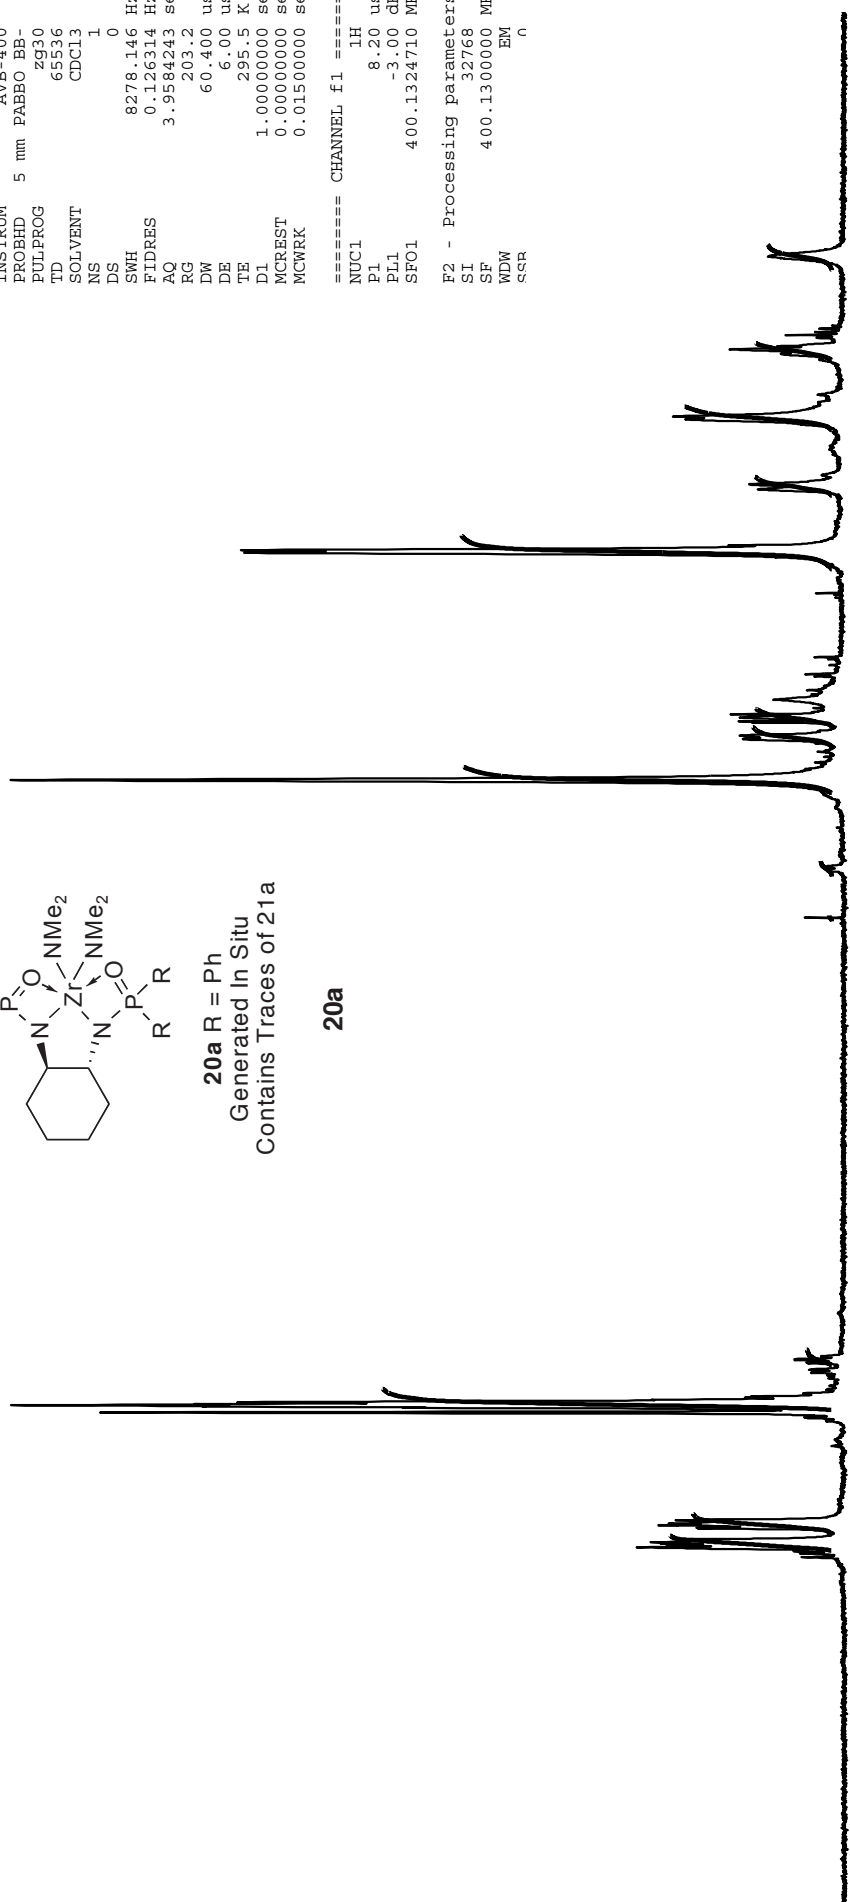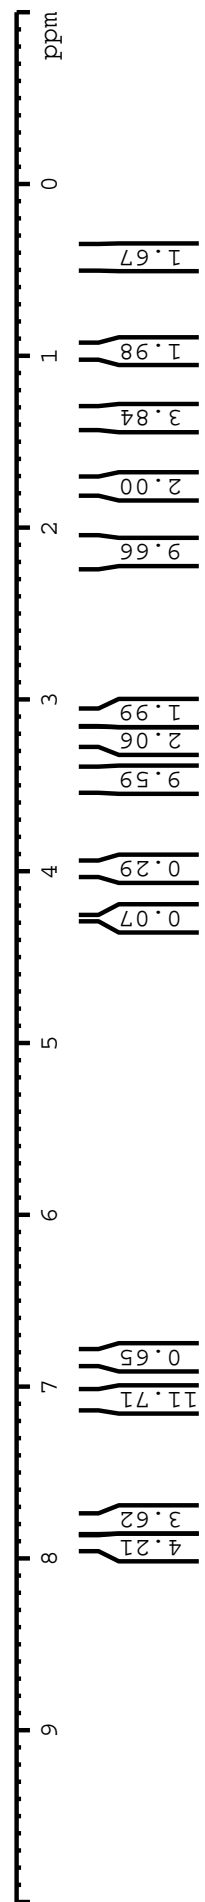

Supporting Information - Watson, Chiu and Bergman

0.291  
1.101  
1.458  
1.622  
1.671  
1.759  
1.782  
1.817  
1.880  
2.024  
2.039  
2.074  
2.104  
2.115  
2.142  
2.181  
2.196  
2.276  
2.361  
2.523  
2.755  
2.856  
2.972  
3.053  
3.087  
3.130  
3.160  
3.339  
3.568

Current Data Parameters  
NAME 3168AH456d  
EXPNO 1  
PROCNO 1

F2 - Acquisition Parameters  
Date\_ 20060220  
Time 12.34  
INSTRUM AVB-400  
PROBHD 5 mm PABBO BB-  
PULPROG zg30  
TD 65536  
SOLVENT C6D6  
NS 1  
DS 0  
SWH 8278.146 Hz  
FIDRES 0.126314 Hz  
AQ 3.9584243 sec  
RG 228.1  
DW 60.400 usec  
DE 6.00 usec  
TE 294.6 K  
D1 1.0000000 sec  
MCREST 0.0000000 sec  
MCWRK 0.01500000 sec

==== CHANNEL f1 =====  
NUC1 1H  
P1 8.20 usec  
PL1 -3.00 dB  
SFO1 400.1324710 MHz

F2 - Processing parameters  
SI 32768  
SF 400.1300000 MHz  
WDW EM  
SSB 0  
LR 0.30 Hz

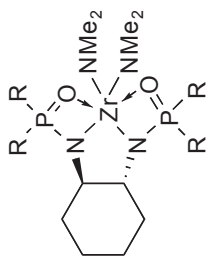

**20b** R = 3,5-C<sub>6</sub>H<sub>3</sub>Me<sub>2</sub>  
Generated In Situ

**20b**

7.803  
7.771  
7.657  
7.626  
7.152  
6.821  
6.777

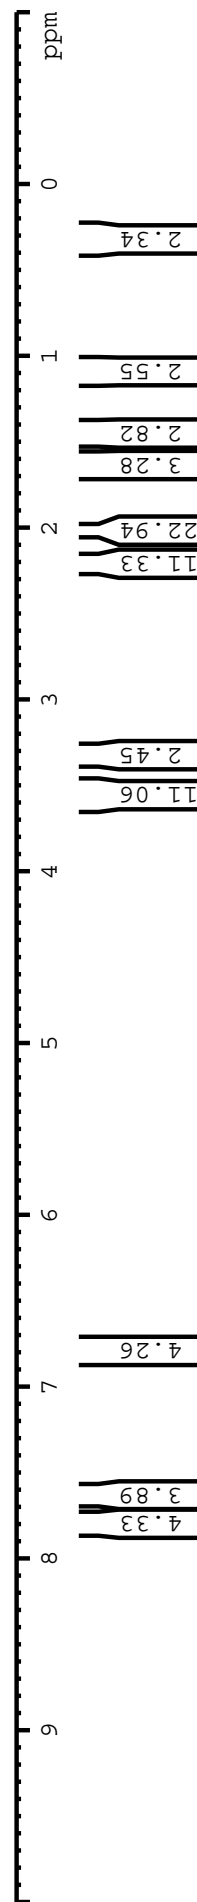

<sup>13</sup>C DRX-500 5mm ZBBO probe  
starting parameters with zgpg30 (waltz16)  
uses ns\*td0

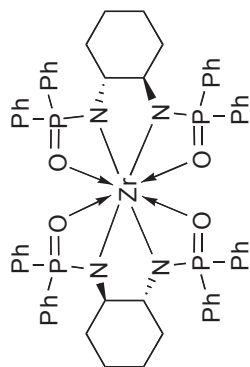

$C_{60}H_{60}N_4O_4P_4Zr$   
Mol. Wt.: 1116.2618

**21a**

```
Current Data Parameters
NAME          4138bC
EXPNO        2
PROCNO       1

F2 - Acquisition Parameters
Date_        20060620
Time         20.10
INSTRUM      DRX-500
PROBHD       5 mm BBO BB-1H
PULPROG      zgpg30
TD           131072
SOLVENT      CDCl3
NS           11309
DS           0
SWH          30864.197 Hz
FIDRES       0.235475 Hz
AQ           2.1234164 sec
RG           16384
DE           16.200 usec
TE           293.0 K
D1           1.5000000 sec
d11          0.03000000 sec
DELTA        1.39999998 sec
MCREST       0.0000000 sec
MCWRK        0.01500000 sec

===== CHANNEL f1 =====
NUC1         13C
P1           8.70 usec
PL1         -3.00 dB
SFO1        125.7722011 MHz

===== CHANNEL f2 =====
```

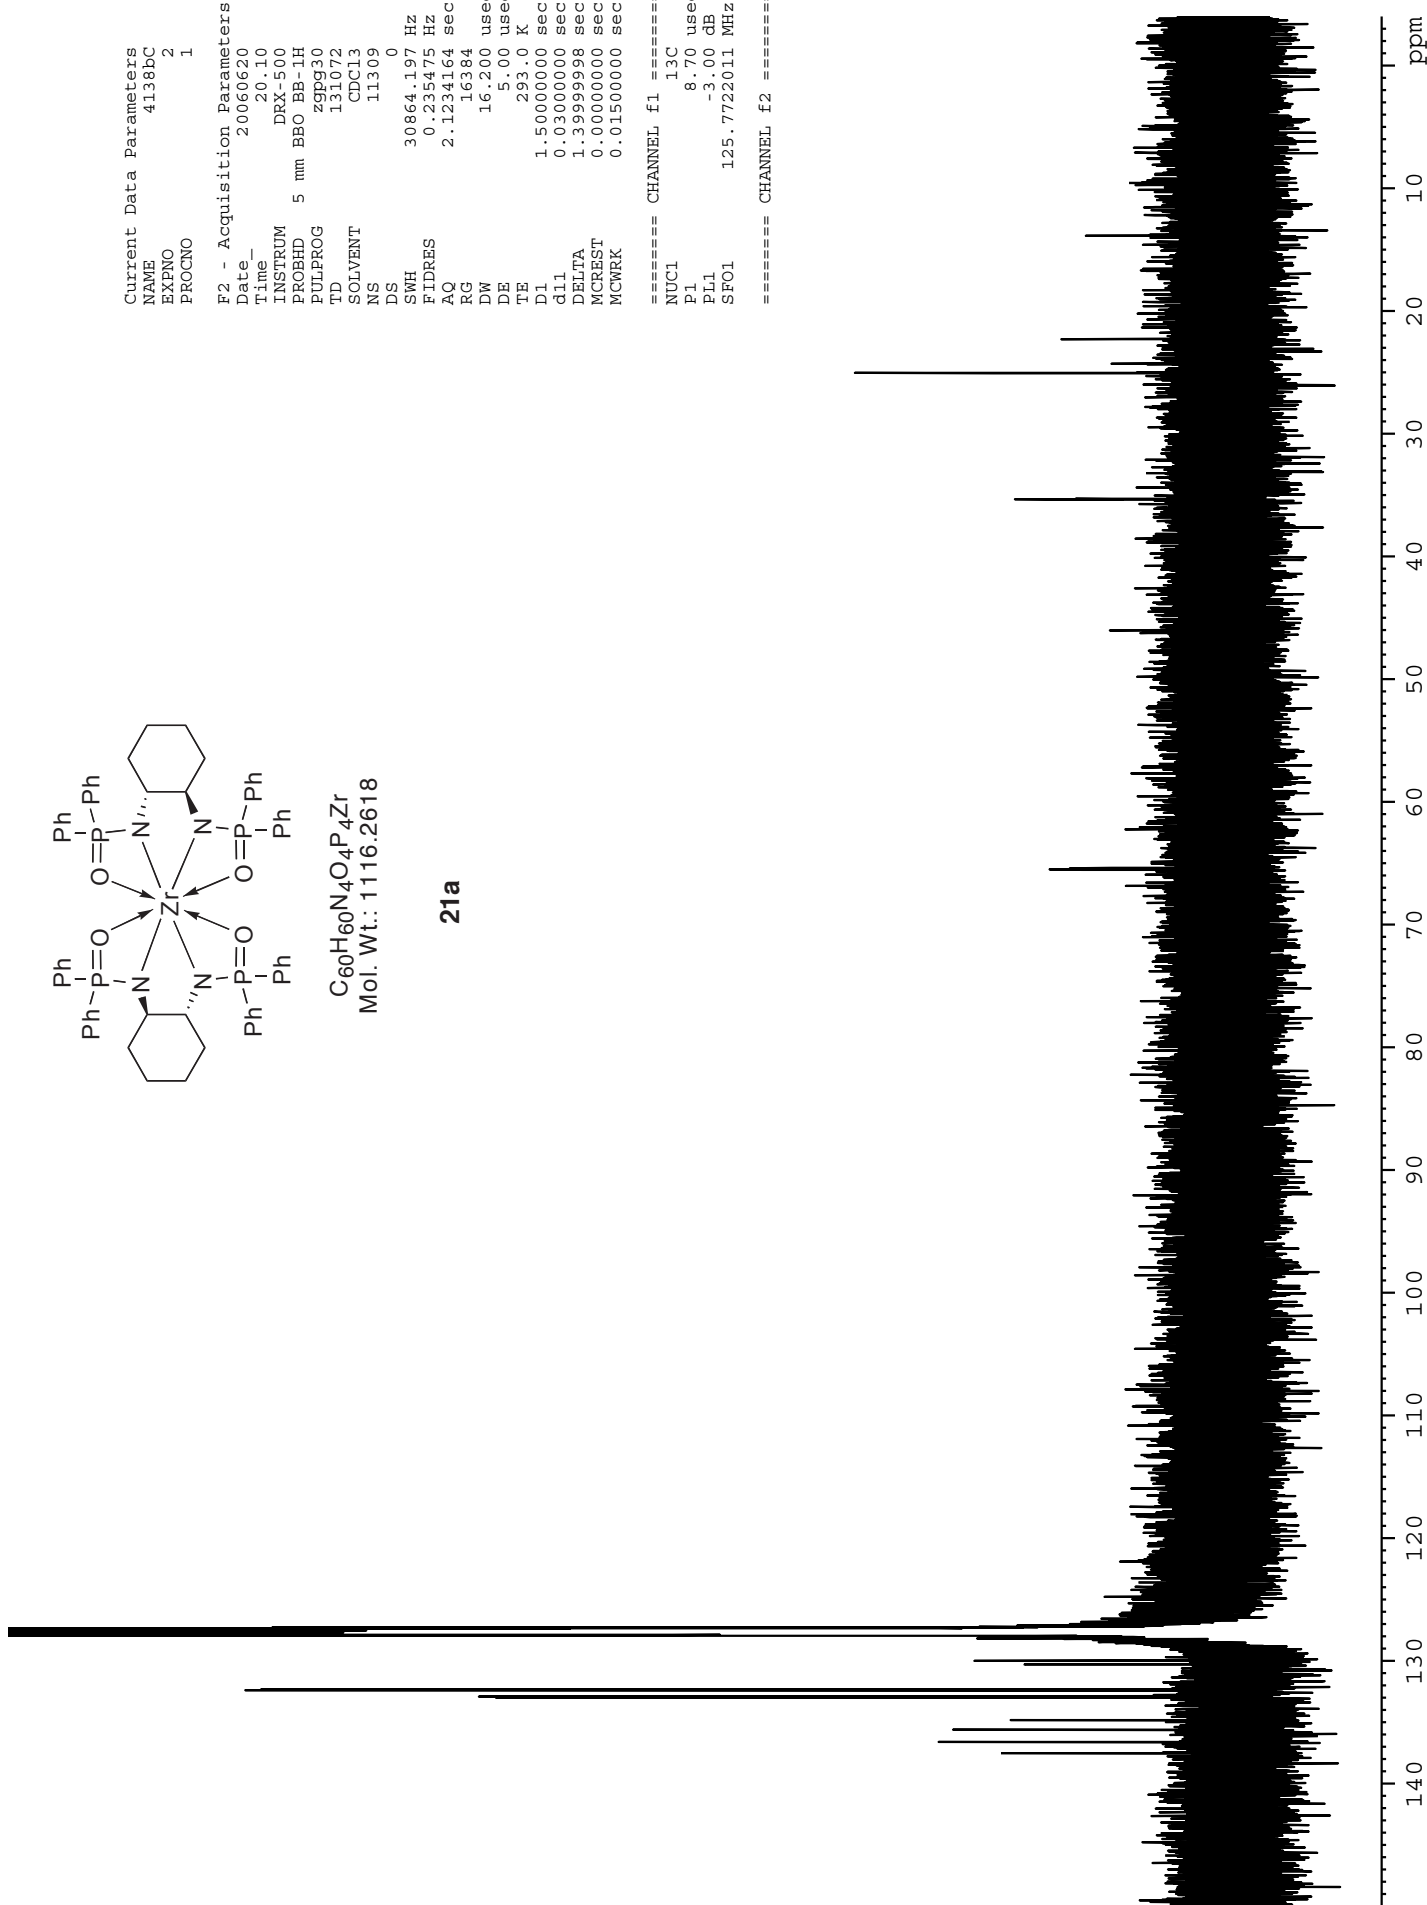

Supporting Information - Watson, Chiu and Bergman

4.083  
4.059

1.779  
1.606  
1.353  
1.083

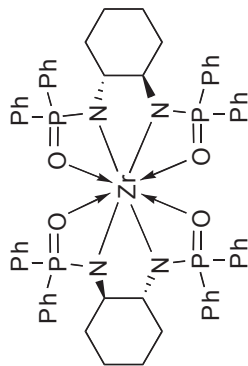

$C_{60}H_{60}N_4O_4P_4Zr$   
Mol. Wt.: 1116.2618

21a

```

Current Data Parameters
NAME      4138BH
EXPNO    1
PROCNO   1

F2 - Acquisition Parameters
Date_    20060620
Time     14.14
INSTRUM  AVQ-400
PROBHD   5 mm QNP 1H/13
PULPROG  zg30
TD        65536
SOLVENT  CDCl3
NS        1
DS        0
SWH       8012.820 Hz
FIDRES    0.122266 Hz
AQ         4.0894966 sec
RG         382
DE         62.400 use
TE         6.00 use
TE        293.4 K
D1         1.0000000 sec
MCREST    0.0000000 sec
MCWRK     0.0150000 sec

===== CHANNEL f1 =====
NUC1      1H
P1        12.80 use
PL1       0.00 dB
SFO1      400.1324700 MHz

F2 - Processing parameters
SI         65536
SF         400.1300142 MHz
WDW        EM
SSB        0
LR         0.30 Hz
    
```

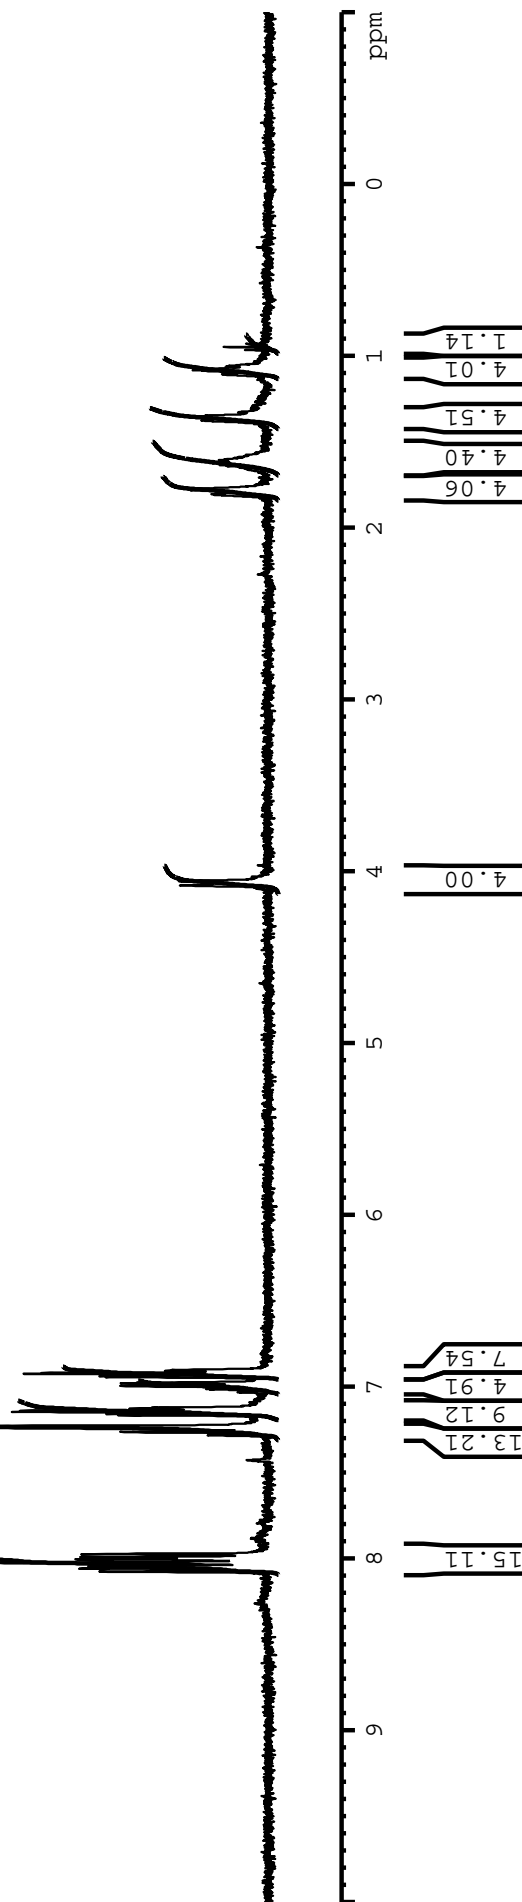

Supporting Information - Watson, Chiu and Bergman

```

Current Data Parameters
NAME      3169aH15024h
EXPNO    1
PROCNO   1

F2 - Acquisition Parameters
Date_    20060216
Time     14.39
INSTRUM  AVB-400
PROBHD   5 mm PABBO BB-
PULPROG  zg30
TD       65536
SOLVENT  CDCl3
NS       1
DS       0
SWH      8278.146 Hz
FIDRES   0.126314 Hz
AQ        3.9584243 sec
RG        287.4
DW        60.400 usec
DE        6.00 usec
TE        294.8 K
D1        1.0000000 sec
MCREST   0.0000000 sec
MCWRK    0.01500000 sec

===== CHANNEL f1 =====
NUC1      1H
P1        8.20 usec
PL1       -3.00 dB
SFO1      400.1324710 MHz

F2 - Processing parameters
SI        32768
SF        400.1300000 MHz
WDW       EM
SSB       0
LR        0.30 Hz
    
```

0.115  
0.881  
1.126  
1.361  
1.882  
1.949  
1.994  
2.022  
2.039  
2.095  
2.176  
2.181  
2.199  
2.260  
2.496  
2.524  
2.558  
3.438

4.086

7.810  
7.779  
7.152  
6.868  
6.652

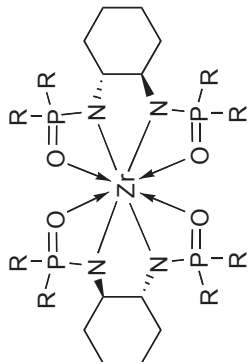

**21b** R = 3,5-C<sub>6</sub>H<sub>3</sub>Me<sub>2</sub>  
Generated In Situ

**21b**

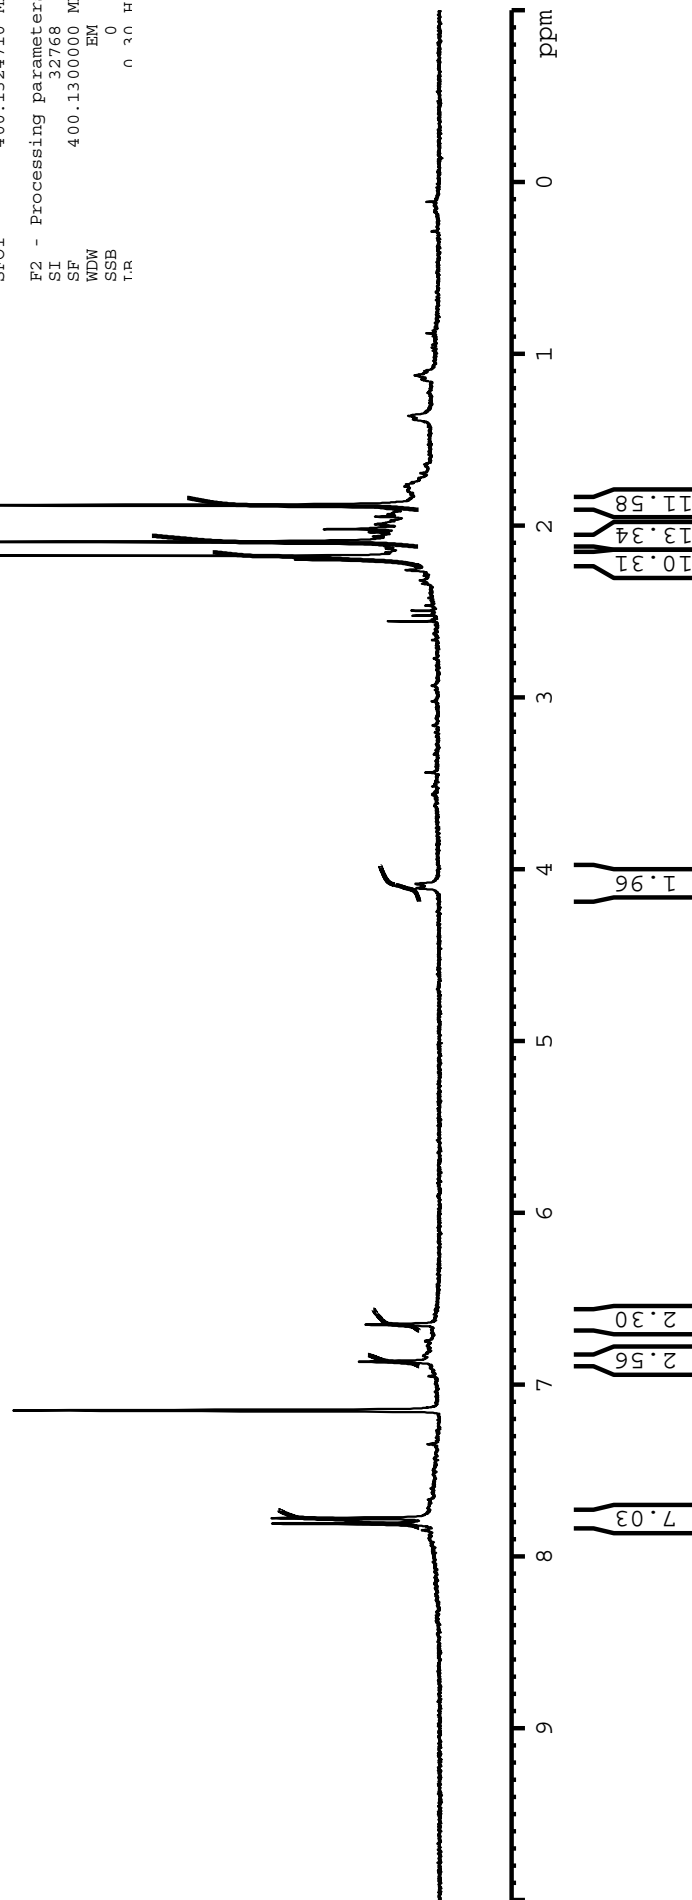



```

=====
Injection Date   : 6/30/06 11:39:42 AM      Seq. Line   :    2
Sample Name     : AN1048 - Watson, Chiu and Bergman  Vial        :    2
Acq. Operator   : MC                          Inj         :    1
                                           Inj Volume  : 2 µl

Acq. Method     : D:\HPCHEM\1\METHODS\HA_SUBFM.M
Last changed    : 6/16/06 10:32:54 PM by MC
Analysis Method : D:\HPCHEM\1\METHODS\DYW.M
Last changed    : 7/23/06 10:16:15 PM by MC
                  (modified after loading)
    
```

S65

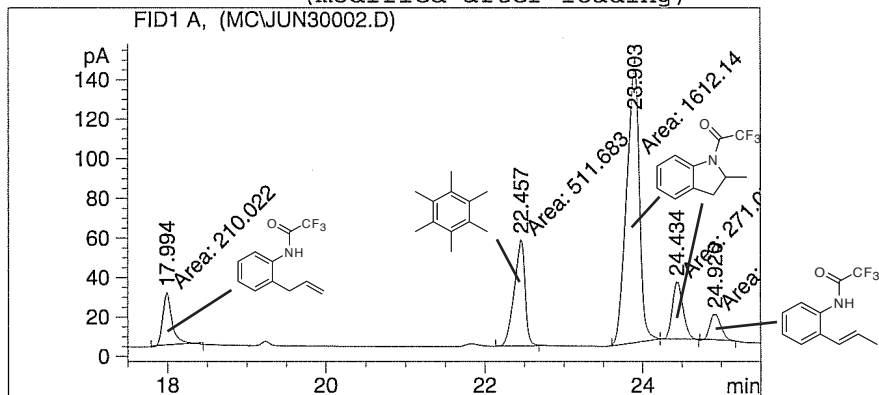

Area Percent Report

```

Sorted By      : Signal
Multiplier     : 1.0000
Dilution       : 1.0000
    
```

Signal 1: FID1 A,

| Peak # | RetTime [min] | Type | Width [min] | Area [pA*s] | Height [pA] | Area %   |
|--------|---------------|------|-------------|-------------|-------------|----------|
| 1      | 1.592         | BP   | 0.0152      | 6.52783     | 6.82050     | 0.00247  |
| 2      | 1.652         | VV S | 0.0277      | 1.38883e5   | 6.56908e4   | 52.45353 |
| 3      | 1.943         | VB S | 0.0255      | 1.22989e5   | 8.02763e4   | 46.45082 |
| 4      | 2.356         | PP   | 0.0260      | 10.88994    | 6.67721     | 0.00411  |
| 5      | 2.479         | BP   | 0.0269      | 4.44667     | 2.74909     | 0.00168  |
| 6      | 3.214         | PB   | 0.0385      | 148.28819   | 53.24548    | 0.05601  |
| 7      | 17.994        | MM   | 0.1326      | 210.02168   | 26.40137    | 0.07932  |
| 8      | 22.457        | MM   | 0.1586      | 511.68347   | 53.78419    | 0.19325  |
| 9      | 23.903        | MM   | 0.1863      | 1612.14307  | 144.22220   | 0.60888  |
| 10     | 24.434        | MM   | 0.1560      | 271.07623   | 28.95608    | 0.10238  |
| 11     | 24.920        | MM   | 0.1614      | 125.91330   | 13.00030    | 0.04756  |

Totals : 2.64773e5 1.46303e5

Results obtained with enhanced integrator!

\*\*\* End of Report \*\*\*

```

=====
Injection Date   : 6/28/06 4:14:45 PM          Seq. Line   :    1
Sample Name     : Supporting Information 176    Vial        :    3
Acq. Operator   : DAW                        Inj         :    1
                                           Inj Volume  : 2 µl

Acq. Method     : D:\HPCHEM\1\METHODS\X_SUBA.M
Last changed    : 6/9/06 10:01:56 AM by MC
Analysis Method : D:\HPCHEM\1\METHODS\SHUTDWN.M
Last changed    : 6/29/06 9:22:36 AM by DAW
                  (modified after loading)
=====

```

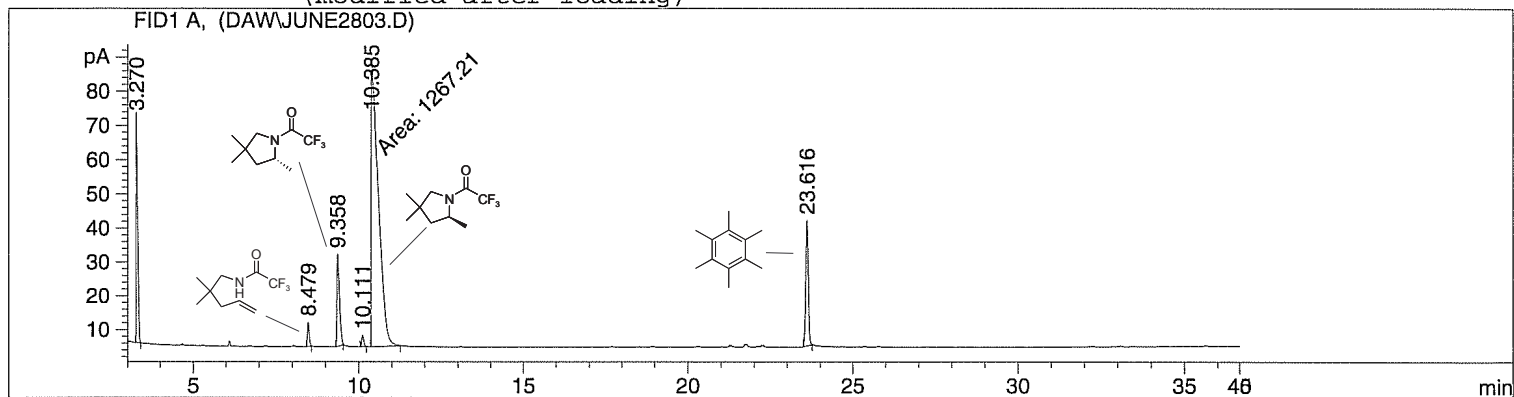

```

=====
                          Area Percent Report
=====

```

```

Sorted By      :      Signal
Multiplier     :      1.0000
Dilution       :      1.0000

```

Signal 1: FID1 A,

| Peak # | RetTime [min] | Type | Width [min] | Area [pA*s] | Height [pA] | Area %   |
|--------|---------------|------|-------------|-------------|-------------|----------|
| 1      | 1.571         | PV   | 0.0110      | 2.62242     | 3.84290     | 0.00115  |
| 2      | 1.593         | VV   | 0.0111      | 2.74232     | 3.93816     | 0.00120  |
| 3      | 1.618         | VV   | 0.0118      | 26.58545    | 35.18530    | 0.01165  |
| 4      | 1.652         | VB S | 0.0284      | 1.56971e5   | 6.93598e4   | 68.79561 |
| 5      | 1.952         | PB S | 0.0255      | 6.92840e4   | 4.14704e4   | 30.36496 |
| 6      | 2.371         | PP   | 0.0280      | 6.25669     | 3.65211     | 0.00274  |
| 7      | 3.270         | PB   | 0.0442      | 228.19263   | 66.27210    | 0.10001  |
| 8      | 8.479         | PB   | 0.0570      | 26.70593    | 7.08096     | 0.01170  |
| 9      | 9.358         | PB   | 0.0717      | 141.81641   | 27.26009    | 0.06215  |
| 10     | 10.111        | PB   | 0.0665      | 14.35946    | 3.38737     | 0.00629  |
| 11     | 10.385        | MM T | 0.2495      | 1267.21167  | 84.64605    | 0.55538  |
| 12     | 23.616        | BB   | 0.0806      | 198.84915   | 37.03812    | 0.08715  |

```
Totals :                      2.28171e5  1.11102e5
```

Results obtained with enhanced integrator!

```

=====
*** End of Report ***
=====

```

```

=====
Injection Date   : 6/23/06 10:33:13 AM          Seq. Line   :    2
Sample Name     : Supporting Information 1       Vial        :    8
Acq. Operator  : DAW                          Inj         :    1
                                           Inj Volume  : 2 µl
                                           Actual Inj Volume : 0.1 µl

Different Inj Volume from Sequence !
Acq. Method     : D:\HPCHEM\1\METHODS\X_SUBE.M
Last changed    : 6/21/06 3:26:59 PM by dg
Analysis Method : D:\HPCHEM\1\METHODS\SHUTDWN.M
Last changed    : 6/23/06 11:58:56 AM by DAW
                 (modified after loading)
=====

```

S67

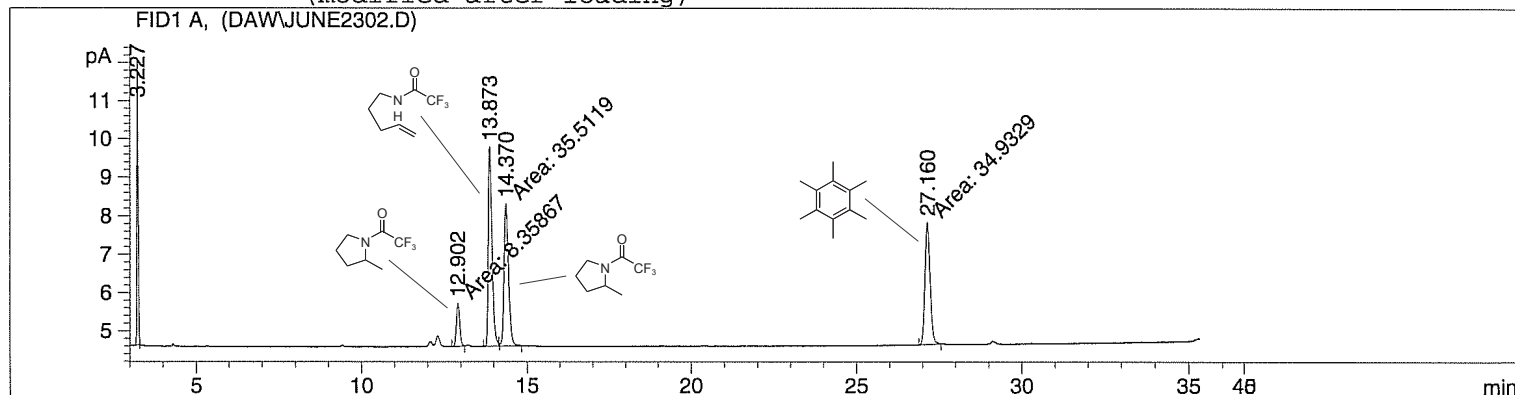

```

=====
Area Percent Report
=====

```

```

Sorted By      :      Signal
Multiplier     :      1.0000
Dilution       :      1.0000

```

Signal 1: FID1 A,

| Peak # | RetTime [min] | Type | Width [min] | Area [pA*s] | Height [pA] | Area %   |
|--------|---------------|------|-------------|-------------|-------------|----------|
| 1      | 0.692         | BP   | 0.0115      | 7.55765     | 10.37646    | 0.03686  |
| 2      | 0.786         | BB S | 0.0165      | 1.29078e4   | 1.11437e4   | 62.95304 |
| 3      | 1.008         | PB S | 0.0117      | 7446.75293  | 1.00331e4   | 36.31869 |
| 4      | 3.227         | BB   | 0.0420      | 20.50775    | 7.48248     | 0.10002  |
| 5      | 12.902        | MM T | 0.1226      | 8.35867     | 1.13644     | 0.04077  |
| 6      | 13.873        | MM R | 0.1363      | 42.45444    | 5.19316     | 0.20706  |
| 7      | 14.370        | MM T | 0.1594      | 35.51193    | 3.71375     | 0.17320  |
| 8      | 27.160        | MM T | 0.1816      | 34.93287    | 3.20565     | 0.17037  |

```
Totals :                2.05039e4  2.12079e4
```

```
Results obtained with enhanced integrator!
```

```
*** End of Report ***
```

Sample ID: bn2nc2s3c  
Filename:  
C:\EZStart\Projects\Default\Data\MC\bn2nc2s3c7-23-2006 10-29-52  
PMOD9010IP60min15mL.met.dat Method:  
C:\EZStart\Projects\Default\Method\MC\OD9010IP60min15mL.met  
Injection volume: 5 uL

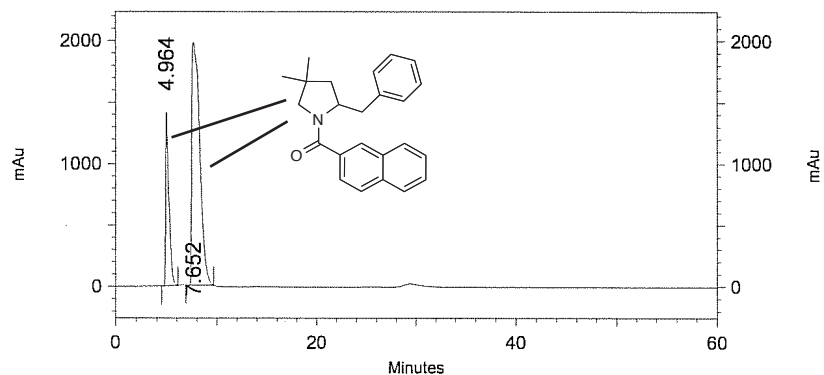

3: 280 nm, 4 nm Results

| Retention Time | Area      | Area Percent |
|----------------|-----------|--------------|
| 4.964          | 31663378  | 22.336       |
| 7.652          | 110098768 | 77.664       |

```

=====
Injection Date   : 6/28/06 5:46:12 PM           Seq. Line   :    3
Sample Name     : DAW41480                     Vial        :    5
Supporting Information: Watson, Chiu and Bergman Inj         :    1
Acq. Operator   : DAW                          Inj Volume  : 2 µl
=====
Acq. Method     : D:\HPCHEM\1\METHODS\X_SUBB.M
Last changed    : 6/9/06 10:03:13 AM by MC
Analysis Method : D:\HPCHEM\1\METHODS\SHUTDWN.M
Last changed    : 6/29/06 9:21:46 AM by DAW
                  (modified after loading)
    
```

S69

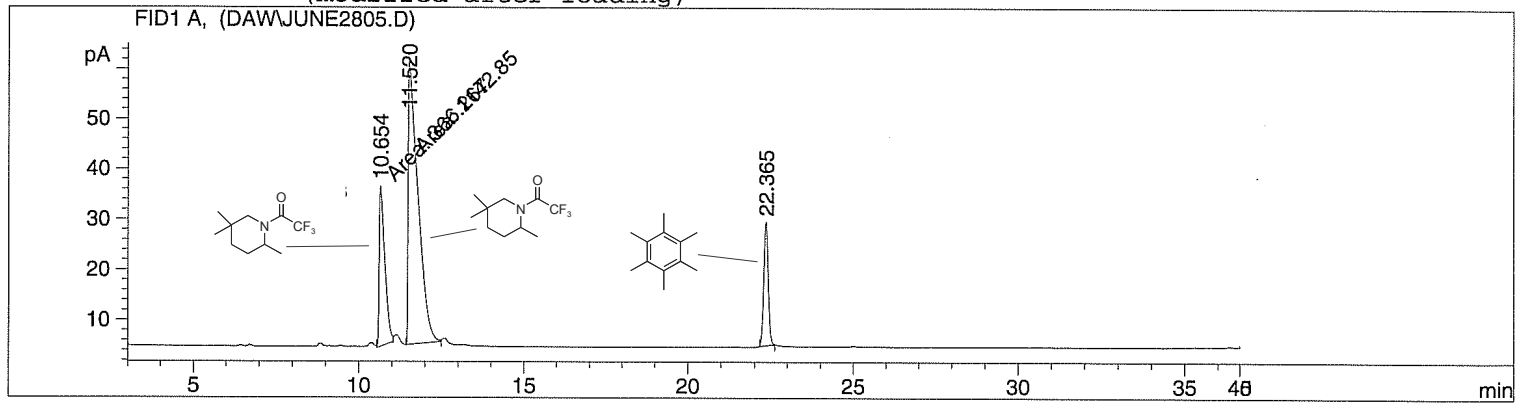

Area Percent Report

```

Sorted By      :      Signal
Multiplier     :      1.0000
Dilution       :      1.0000
    
```

Signal 1: FID1 A,

| Peak # | RetTime [min] | Type | Width [min] | Area [pA*s] | Height [pA] | Area %   |
|--------|---------------|------|-------------|-------------|-------------|----------|
| 1      | 0.727         | BP S | 0.0175      | 1.75196e5   | 1.41437e5   | 70.38090 |
| 2      | 0.876         | VB S | 0.0184      | 7.17398e4   | 6.50759e4   | 28.81977 |
| 3      | 1.096         | BP   | 0.0206      | 6.31058     | 5.04526     | 0.00254  |
| 4      | 1.169         | BP   | 0.0190      | 1.73517     | 1.55988     | 0.00070  |
| 5      | 1.496         | BP   | 0.0222      | 1.66162     | 1.12613     | 0.00067  |
| 6      | 1.695         | BB   | 0.0326      | 227.40259   | 95.95634    | 0.09135  |
| 7      | 10.654        | MM T | 0.1909      | 366.26709   | 31.97196    | 0.14714  |
| 8      | 11.520        | MM T | 0.3327      | 1142.85339  | 57.24689    | 0.45911  |
| 9      | 22.365        | BB   | 0.1194      | 243.50099   | 24.61148    | 0.09782  |

Totals : 2.48926e5 2.06731e5

Results obtained with enhanced integrator!

\*\*\* End of Report \*\*\*

|                                                                   |                     |
|-------------------------------------------------------------------|---------------------|
| <b>Sample ID:</b>                                                 | <b>dm2nap2c1s4a</b> |
| <b>Filename:</b>                                                  |                     |
| C:\EZStart\Projects\Default\Data\MC\dm2nap2c1s4a7-20-2006 8-04-49 |                     |
| PMMCWH9010IP2mL.met.dat                                           | Method:             |
| C:\EZStart\Projects\Default\Method\MC\MCWH9010IP2mL.met           |                     |
| <b>Injection volume:</b>                                          | <b>5 uL</b>         |

Description: {Data Description}

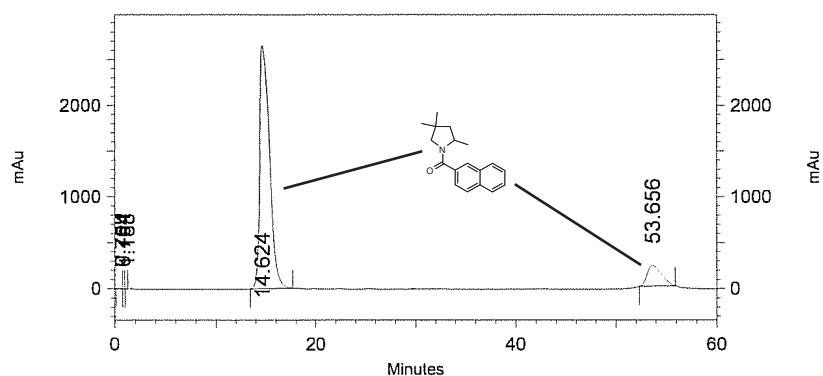

1: 230 nm, 4 nm Results

| Retention Time | Area      | Area Percent |
|----------------|-----------|--------------|
| 0.280          | 42145     | 0.020        |
| 0.764          | 12103     | 0.006        |
| 1.188          | 6015      | 0.003        |
| 14.624         | 183288888 | 89.144       |
| 53.656         | 22260222  | 10.826       |

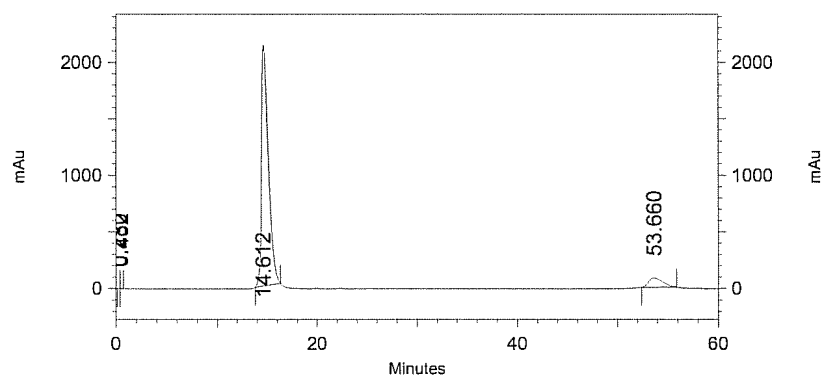

2: 240 nm, 4 nm Results

| Retention Time | Area      | Area Percent |
|----------------|-----------|--------------|
| 0.280          | 2239      | 0.002        |
| 0.432          | 3770      | 0.003        |
| 14.612         | 102679324 | 92.651       |
| 53.660         | 8137998   | 7.343        |



```

=====
Injection Date   : 6/17/06 4:11:57 PM           Seq. Line   :    3
Sample Name     : DAW4133f                     Vial        :    4
Supporting Information: Watson, Chiu and Bergman Inj         :    1
Acq. Operator   : DAW                          Inj Volume  : 2 µl

Acq. Method     : D:\HPCHEM\1\METHODS\X_SUBD.M
Last changed    : 6/9/06 10:05:13 AM by MC
Analysis Method : D:\HPCHEM\1\METHODS\GORIN.M
Last changed    : 4/4/06 3:50:43 PM by KAN
    
```

S72

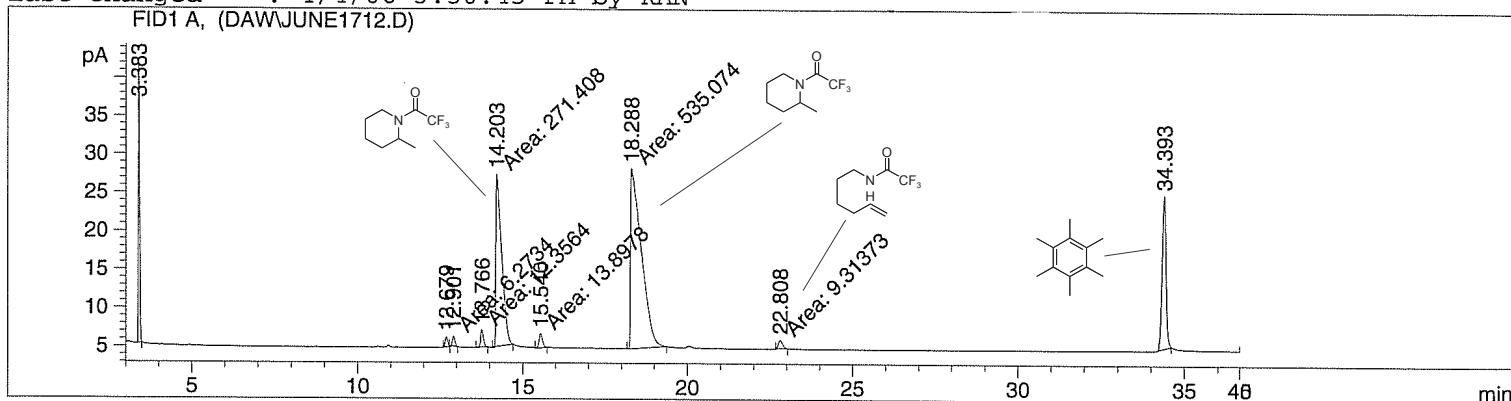

Area Percent Report

```

Sorted By      : Signal
Multiplier    : 1.0000
Dilution      : 1.0000
    
```

Signal 1: FID1 A,

| Peak # | RetTime [min] | Type | Width [min] | Area [pA*s] | Height [pA] | Area %   |
|--------|---------------|------|-------------|-------------|-------------|----------|
| 1      | 1.580         | BV   | 0.0186      | 7.89778     | 5.91077     | 0.00575  |
| 2      | 1.628         | VP   | 0.0161      | 46.23575    | 41.20645    | 0.03367  |
| 3      | 1.677         | VB S | 0.0334      | 7.13816e4   | 3.56321e4   | 51.98667 |
| 4      | 1.961         | PB S | 0.0211      | 6.47520e4   | 4.70268e4   | 47.15844 |
| 5      | 2.388         | PB   | 0.0265      | 6.55903     | 3.92605     | 0.00478  |
| 6      | 3.383         | PB   | 0.0391      | 96.69431    | 36.30813    | 0.07042  |
| 7      | 12.679        | MM R | 0.0876      | 6.78294     | 1.29008     | 0.00494  |
| 8      | 12.901        | MM T | 0.0821      | 6.27340     | 1.27406     | 0.00457  |
| 9      | 13.766        | MM T | 0.0930      | 12.35639    | 2.21524     | 0.00900  |
| 10     | 14.203        | MM T | 0.2018      | 271.40753   | 22.41681    | 0.19766  |
| 11     | 15.540        | MM T | 0.1245      | 13.89779    | 1.86032     | 0.01012  |
| 12     | 18.288        | MM T | 0.3799      | 535.07355   | 23.47433    | 0.38969  |
| 13     | 22.808        | MM T | 0.1448      | 9.31373     | 1.07188     | 0.00678  |
| 14     | 34.393        | BB   | 0.1259      | 161.33351   | 19.82506    | 0.11750  |

Totals : 1.37307e5 8.28196e4

Results obtained with enhanced integrator!

\*\*\* End of Report \*\*\*
